# Supplementary material for: Quantitative Trait Locus Analysis of Late Leaf Spot Resistance and Plant-Type-Related Traits in Cultivated Peanut (Arachis hypogaea L.) under Multi-Environments
Source: PLoS One. 2016 Nov 21;11(11):e0166873. doi: 10.1371/journal.pone.0166873 (PMC5117734; doi:10.1371/journal.pone.0166873)
Supplement: S1 Table — (XLSX) [file pone.0166873.s004.xlsx]

## Sheet: SNP
S1 Table. The sequence information of SNP markers of the genetic map used for QTL mapping in this study.
Name	SNP	Seq	Reference
Ahsnp295	[C/A]	AGCTCACGGCCAGTAGGAAAGGCATG[C/A]ATCATGTGTATTTGTATGATTTGGTTGAATATGTAATTATTTTAGTTTGCCTAAGTGC	Zhou et al. 2014
Ahsnp333	[G/A]	AGCTCAGATGGGGGGAGGCAAGGGTTACCCCTTGTAAAATGGGAAGTTATTATGGCTCCAAAGAAAGCA[G/A]GAGGACTGGGGGTTG	Zhou et al. 2014
Ahsnp868	[C/T]	AGCTCGCCCCTTTTTTTTGGATGAGAATGATGAGCCTGCTTTTCCCTTGGAATGGCAAAAAGATGTGAGGGTCTCC[C/T]GGTATTCG	Zhou et al. 2014
Ahsnp1059	[A/G]	AGCTCTATCTTTCTCATCATTCCATTCAGCCTCAGCCTTAGGAACAATTACACCATTAGTTCCTGTTTT[A/G]TTGGAACTTGGGGAC	Zhou et al. 2014
Ahsnp297	[C/T]	AGCTCACGGGTAAGAGAGGAAGCGTCGCGCTAGCCACTGAACTTGCGTTCGTCGTCGTCTTCGCGGGTTCCTGTCGCCAC[C/T]GTCG	Zhou et al. 2014
Ahsnp1315	[G/A]	TAAGACAGAGGCTGATAAAGCTCCTGCGAGACATTCCGACCTCTTCACCT[G/A]AAAAGCTTCCGACATGCCAGGGATAGACCCTC	Zhou et al. 2014
Ahsnp1103	[C/T]	AGCTCTCTCTTTCTGTTCTCTGAGTCTGACCGAGGTAGATGTGAAGAGCTTGAAAGGCATCAGTGTT[C/T]CGGAGATTACCTGAAAC	Zhou et al. 2014
Ahsnp1280	[G/A]	TAATCAGGGAAGCTCCGC[G/A]GACATCCTATTCAAATCCGCCTTTGACAAGCTTGAACTACAAGCATATCCCAATAGCCTGTTCGAG	Zhou et al. 2014
Ahsnp1883	[C/A]	TAAATGCCAGGGAG[C/A]AACTAGAAAGATTTTGGCTTTTGAATCATTGAAGAACCAGCCTTTTAGCCGATTGCATCTGAAAATGAAG	Zhou et al. 2014
Ahsnp768	[G/A]	AGCTCCTGTTCTACTCGTAAAGAAGAAGGATAAAACAATGCAACTATGTGTGGACTATCGTCA[G/A]CTCAATAAGATAACTGTTCGC	Zhou et al. 2014
Ahsnp1196	[G/A]	AGCTCTTCCCCTAACTTTTGTTGAGACTCATGGTGAAGAATTAG[G/A]AACAATGTTCTATGTCATTGACGAGCTAGATAATTGTTTA	Zhou et al. 2014
Ahsnp1471	[A/T]	TAACCGACCCATCCACATTCAATTTGGTCCAATTCCAATTTGGCGCCTCCCAACCAA[A/T]AAGCTCCTCTCTGGTAGGGCTTAGTAA	Zhou et al. 2014
Ahsnp1795	[C/T]	CGCTCCGTTGTACCTTCTAACCT[C/T]CCAGTTACCCTTGCGCTGCCGAAGTGCCACGCGGATCATCCACGTGCAGCCGTTTCCAAAC	Zhou et al. 2014
Ahsnp40	[G/A]	TAATCTAAACCACAATGGTGATACAGGAGTTGGTGAGGCTGAACC[G/A]TTGGGAGAGGTTGCAATCGCGATGCCCGATTATCCTG	Zhou et al. 2014
Ahsnp204	[G/A]	AGCTCAACCTGAGAATTATTTAGTATTTGTATCGAGATGAACTGCGTCGAACTATTAGT[G/A]GCAAGTGATAACAAATAAAATGGAA	Zhou et al. 2014
Ahsnp394	[G/T]	AGCTCATCAGTGTAACATCACCTTGGCCGTTC[G/T]CAAAGCTATTTCCCCAAGGATTGGGACAAGTCAAGTTCCTCATTGTAGGGGT	Zhou et al. 2014
Ahsnp490	[G/A]	AGCTCCAAAACTCCAAATGGTGC[G/A]CTCTCAATTGCGTTGGAAAGTAGACATCCAAGGATTTCCCACAATATATAATAGTACATTC	Zhou et al. 2014
Ahsnp564	[G/T]	AGCTCCATCTCAGGGTCCCGATCAACCTGTTCTGTCCTCTCCTGGTGCTGCTCCGACTTCTCTCCCT[G/T]GTCCTGATGGTGCTCCG	Zhou et al. 2014
Ahsnp964	[G/A]	AGCTCGTCACTGCGGATGCGTGGCCGTAAATAGTGCGGCGATCGGAGGTCTAGATCAAAAGTTATGTGG[G/A]TTTGAATTTATGCCC	Zhou et al. 2014
Ahsnp1053	[G/T]	AGCTCTATCCACCTCTTCTAACTCATATTCA[G/T]TTCTTTCTTATCAAAGAGGTACTTCAAACTTTTGTGATCTGAGAAAACTTGAA	Zhou et al. 2014
Ahsnp1305	[C/T]	TAAACGCTCGGCGCAAAGAACGAGGCGACAAAGGGCGTTCCTTCGAAGTGACGAGCCTCACTCGCG[C/T]GTAGGGGGCACGCCCCTA	Zhou et al. 2014
Ahsnp859	[G/A]	AGCTCGCAGAGACCCCCAGACGGTTTGTGGAGTGGATCCG[G/A]AACGTCCAAAGTAAACCGGATTTGAAGGTGAATAATTTTCTTTG	Zhou et al. 2014
Ahsnp1312	[G/A]	TAACACTGCCACCAGTAGCGGTGCTATCACTAGTAGGGTCGATGCCAGTGGTGC[G/A]CATCTAGGCCTGGTACACCTTTATCTAAGT	Zhou et al. 2014
Ahsnp1680	[A/G]	AGCTCCAAGTCTTTGGCAATGGTGTCAATGTTCC[A/G]AAGGTTACCTGAAACGGATGGATTGGGTCTGAACGTGAGGTTCGTCAAAG	Zhou et al. 2014
Ahsnp47	[C/A]	AGCTCCTAGGTATCAAG[C/A]AACTAGATCTTCCCTAGTGTCTTCATCCTCACTTGAGGATGAGTAGTCATTGAAACTAATGCACTGC	Zhou et al. 2014
Ahsnp52	[G/A]	TAAACAACTTTTAGAGACTTATTTGTATCTCATGACATTCTTAGATCTGAATTTTTATAATCTTTGAC[G/A]GCATGAGTCTCTAAAC	Zhou et al. 2014
Ahsnp178	[C/T]	AGCTCAAATCGTTACCTC[C/T]TCTGAAATATGTGTTCTTGGGTGAAAATGATTCCTATCAAGTGATTATTAGCTCTTCCTTGAAGTC	Zhou et al. 2014
Ahsnp361	[C/T]	AGCTCAGGCTGGAGTTTAGAGAGTCCCTGGAGCAGATGAAGCGTATGGAAACTTAGATAAAGGTGTACCAGGCCTAGATG[C/T]GCAC	Zhou et al. 2014
Ahsnp438	[C/T]	AGCTCATGGCCTT[C/T]ATTGGAAAGATGTGCATCGTGATTGTTTCCCGCATACTCTTTATGATATTGCTTTGTGTTCTTGATCTGTG	Zhou et al. 2014
Ahsnp614	[G/A]	AGCTCCCGTCCA[G/A]TATAACTCCAAAACTGTTGGCAGGTTGATTGGAACATGGTACAACAAGTATACAACACCTCCTATTTCTACT	Zhou et al. 2014
Ahsnp693	[C/T]	AGCTCCTACGATGATTCGACGGCACACAAGTGCTTCATGGACCCGATCCGGT[C/T]TAGTGCGGCCTGAAGCGTAAACTGTCCAGACC	Zhou et al. 2014
Ahsnp997	[T/C]	AGCTCTAAAGCTGAAATTTGGGTCTTTTCTCTTTGAGTCACTCAGGGAACTC[T/C]TATTCAAATGACAACAAACAACTACAGTAGGC	Zhou et al. 2014
Ahsnp1291	[G/A]	TAATAATCATAACATAACTGTATTCGTATACTCAGAAAATTCCGGTGCATGCATG[G/A]CTTCGAGATCTAGAGTCCGCATAAAAGAC	Zhou et al. 2014
Ahsnp1432	[G/A]	TAAACATCCCGAAGCCAATG[G/A]ACAAGCTGAAGATGCCAACAAAGTCATACTGGCTGGGCTGAAGCAGAGTTTACAGGATGCAAAA	Zhou et al. 2014
Ahsnp1892	[C/A]	TAACACACAGGTCACGG[C/A]ATCGAATGGCACCAATAGGAGAATAGAAATGTATCTAGTTTAGTGCAAAATAAGCATGTTTTCATCC	Zhou et al. 2014
Ahsnp114	[G/A]	AGCTCAACTGGTCT[G/A]ACGACGACAGAAGCCATGTTGTGAAGCCAATGCAAGAGCCCGAAGAAGACAACGACCGCAGCCTCACTGT	Zhou et al. 2014
Ahsnp149	[G/A]	AGCTCAAGCAAAGCATGTATATCATTTTGAGCGTGTCGCACATCCAGCCAAGCATCGCCTAGTGTGTGTGCGCACA[G/A]CTACTTGT	Zhou et al. 2014
Ahsnp151	[C/T]	AGCTCTTTTGTTATTAGAGCCTTCCCATCTTCTTCTTCTCGTCATCTTTGCCTTCGCAT[C/T]GTACTCTCTTTCACATTGTTCTTGC	Zhou et al. 2014
Ahsnp345	[A/C]	AGCTCAGCCAAATCGCCAAAGGAGCCCAAAGCAGGCCC[A/C]AAACGAAGGAACACAGCTGATGAGCGGATAATTTATACGCTTTTTG	Zhou et al. 2014
Ahsnp628	[G/A]	AGCTCCCTGTTATGGT[G/A]GCTTGTGCTTGAATTTATCCAAAAATCTCCACCAATGTTTGGAATTCCCAGGCTACCCACACTAGTTG	Zhou et al. 2014
Ahsnp635	[G/A]	AGCTCCGAACAACTAAC[G/A]CCAGGACCGTTATCAAAGGACAAAGAGAAAGCTCCTACTCACCCTCAAAACAATAAGACAAGATTTG	Zhou et al. 2014
Ahsnp651	[C/T]	AGCTCCGATTGACAAACCATTTGCGA[C/T]TACGTGTTCATTGTGATGAGGTCTACAAAACCCATGGAATAATTTGGTAGGTAACTCA	Zhou et al. 2014
Ahsnp740	[C/T]	AGCTCCTCTAGAATACCTCTGCCACCTTTACCACGTCCTCTTCCTCTTCCTCTT[C/T]CTCTGACACTGCCTTGCCTAATCTGATATG	Zhou et al. 2014
Ahsnp917	[C/T]	AGCTCGGCCAAATTGTCAGGAAAGTTCAGAAGAGGGCCCAAATGGAGGAACATGACCCAAGTCCAGAGG[C/T]AGCCCAAACCTACAG	Zhou et al. 2014
Ahsnp949	[G/A]	AGCTCGGTCTTCCTTTTGAGGTTGAGTCTTTAGTTTTATGACTTTTGATCCTTCTCGGGTGAAGCCGAACTCGAGCATTTT[G/A]TCA	Zhou et al. 2014
Ahsnp1149	[A/C]	AGCTCTGGGGGTGGATGA[A/C]TCAGTTCGAGGTCACCCATATGACCTACGGACGGAGCGAAAGCTACCTGATAGGATATTCCATCGC	Zhou et al. 2014
Ahsnp1337	[C/T]	TAACTGCATCATCACCTCGACCAGCAAGTCCCTGATCCATCCTA[C/T]AACCCGTACTAGTGACATTTTGTACATTGACGCCGTCTGT	Zhou et al. 2014
Ahsnp1587	[G/C]	TAATGTAAATACCGTGTAACAGTGAGGGTGGGGATGTTGACGGTGGAAGCTGGTGGCGC[G/C]GCGGTGGCCGAAGCGAGAGGAGAAG	Zhou et al. 2014
Ahsnp2020	[A/G]	TAATTATTATTATATTTGCTACTAAACAG[A/G]GGGACGGTTGAGCGCAGTAGAAGCATTGACATCCACAGCACTATGTGGAATTATT	Zhou et al. 2014
Ahsnp98	[C/T]	AGCTCTTACTGAACCAAGAGCCTTGTGGGTCAGAACAGTCCCATCCAGTG[C/T]AGAAAAATTCTCACAGACTTGAGTTAGAGTAATC	Zhou et al. 2014
Ahsnp448	[G/T]	AGCTCATTACCTATAGTAGGATCAGACATGCATCATGCTTGTTTGC[G/T]CATAATTGTGTGATTGCATATTGGATGTGATCGTGCAT	Zhou et al. 2014
Ahsnp550	[G/A]	AGCTCCAGGTCCCCGGCAACGGCGCCAATGTTCCGGG[G/A]CTTACCTAGAACCGGACGGTGGTTGCATTATGTGTTAGGCTTTCAGC	Zhou et al. 2014
Ahsnp695	[G/T]	AGCTCCTAGCTAACGCCACT[G/T]CTCAAAGAAGCCAAAAATTCCTATATAGAAACATTGTCACAAGGTTTAGGGTTCCTTACTCCAT	Zhou et al. 2014
Ahsnp722	[A/C]	AGCTCCTCATGAAAGAATTCCTACATGATATAAAGACAAGTGTCAAAAATTGT[A/C]GAGAATTATGTGCAGACGATGATCAAGAACC	Zhou et al. 2014
Ahsnp739	[G/A]	AGCTCCTCGGCGACGATCGATGTTTGACGGTGGTGTGAG[G/A]GAGGGGCGCGGGAAAAGGGAAGTACCACGCGACCACCGTAAAGGG	Zhou et al. 2014
Ahsnp772	[A/G]	AGCTCCTTCAACTCAGACTTCAGAAGCCTTTGG[A/G]TCGAGCATAGGAGTATCCTCCTCATCTTCTGGTGCAGAGACAATCTTCCCA	Zhou et al. 2014
Ahsnp783	[G/C]	AGCTCCTTGAGATGGTTGCCAATAACCAGTACTTATACTCATCTAAGAGGACTCCAGTTAGGAAGGAAGCTCAA[G/C]GGTGAAGGAA	Zhou et al. 2014
Ahsnp954	[C/T]	AGCTCGGTTTCTTTTTTGAGGC[C/T]GAGTTCTCAACTTTGGTCCTTCTCTAGTAGAGCCGAAATCAAGCACTTTTGTCGATTCCTTT	Zhou et al. 2014
Ahsnp1098	[G/A]	AGCTCTCTCCATCACCGCTCTCGTCGCCATCGACGCACGAGCTTTCTCCGCCGCTGCTCTCGCTATGTCTGCTCTCTTC[G/A]TGAAT	Zhou et al. 2014
Ahsnp1184	[C/A]	AGCTCTTCAATTTTATCTGAACAAAGTGGTAAGAAACTTTGATTTTCATGCCTAGTT[C/A]TTCCTTCCACTCAGTTTCACGTTTTTG	Zhou et al. 2014
Ahsnp1488	[G/T]	TAACTACACGGGAATCAAATGAATTAGTAGTAAATGAGCTTGTTTCGCTCTCAGATGGAGGTTCAGATTC[G/T]CCCTCAGATGAG	Zhou et al. 2014
Ahsnp1547	[C/A]	TAATAATGAG[C/A]AAATATAAGATCAAAGGAGCATGTTTTCAATCATTGCACATATTTAGGAAGGAGAATGTAAACTCATGCAAATA	Zhou et al. 2014
Ahsnp1569	[C/T]	TAATCTGGGTAGTTATCTTTGTTCTGATGCTATCTTAGATCATTGGGAGGCTGGCCATTCGGCCATG[C/T]CTAAACCTTGTTCTTAT	Zhou et al. 2014
Ahsnp1573	[G/T]	TAATGAAGTGGTTGTCATAAGTTACATTGTCACTGCCAGAGAAGCTATTGTGGTCGCCGGAACCATCACCGGAGCTTCT[G/T]CAGTT	Zhou et al. 2014
Ahsnp1637	[G/T]	AAATGAAGCAC[G/A]TGGCTTGCAATTTTTGGGACTCTTTGGCCCAATTTTGGAAGTGCTGAAGCCATTTTGGAGTGCTATATGAA	Zhou et al. 2014
Ahsnp1643	[G/A]	AACTCCACTGTGCCACTAGACCGCCGCTCTGCTCTGGCCGGTTCACCCCTCTCT[G/A]TTCTCTCTCTCCTTCCGTTTGCTCTATTCT	Zhou et al. 2014
Ahsnp1658	[G/A]	AGCTCAATTGTGTGGACTTCTTCTTCTCTGCCTCTA[G/A]GGTGTAGACTTTCGTTGTAACAGCGGGGCGCGATCCTCTGGTCTGCTT	Zhou et al. 2014
Ahsnp1669	[C/A]	AGCTCAGGAGTAGGTTGGAATCAGTTCAGGTTGATTACACCGGACTTCACGGTCATCTTGTAGGAGGTGTTCCTGCGG[C/A]TTATGA	Zhou et al. 2014
Ahsnp1673	[A/G]	AGCTCATCAATTTC[A/G]GAGGAAGAAAAGGTACTAGCCATATTAGGTTAGGATCAATGATGGATAACTCCCAAAATCAGCTACCTCC	Zhou et al. 2014
Ahsnp1734	[G/A]	AGCTCGTCAAGAGCTTCGTGTGGCT[G/A]CAAACAGCTCGTCAATCGGAGTCTCGTAGCTCAAGTTATGACTCCCAGAAGGTGGAGGC	Zhou et al. 2014
Ahsnp1994	[C/T]	TAATCTTGTGCAAGTTTATGTTGATGATATCATATTTGGTTCGGCTAATGAGGATTTGTGTGCAGATTTTGCTAAG[C/T]TTATGACA	Zhou et al. 2014
Ahsnp226	[C/G]	AGCTCAA[C/G]GCGATGAACGCGTGGCAGCAAACGGTGAAGTAATCGGAACTCCGGATCAAAAGTTATGGTGGTTTGAAGATCAAGCA	Zhou et al. 2014
Ahsnp419	[G/T]	AGCTCATGAATGGTAAAAGGAGGTTCAATAGAATCTTTATGGTCTTCTA[G/T]ATGAGCCTCAGATTCCTCAGGTTCCTCAGTTTGGA	Zhou et al. 2014
Ahsnp465	[C/T]	AGCTCATT[C/T]CTGGCCCAGTTTTGAGCCCAGTATGCAGATTAGAGGCTGGGAAGTGGAGCTGAATCATTCCATTCATTCATTCACA	Zhou et al. 2014
Ahsnp553	[C/T]	AGCTCCAGTAGACAGCATAGAGCACAACTT[C/T]GTACTGGAACGAGTAGAGAACGTTGTCATTGTAGAAGAAGAAGAGTTGGTTGAG	Zhou et al. 2014
Ahsnp602	[G/A]	AGCTCCCCTTCATCTATCTTTGGATTTTGAATTCTCTC[G/A]CTTGGGTCGATGAATAACATGCTAATGCACCACTATTTCGTGGTAC	Zhou et al. 2014
Ahsnp618	[T/G]	AGCTCCCTAGGTAGATGCA[T/G]TAGAGGGATTCCACTTGTTTCGGGTGGAGATTTTATGTGTTGAGATAGAATCACTGAGTTGGAAC	Zhou et al. 2014
Ahsnp673	[C/A]	AGCTCCGGAATGAAAATGCTTACCGTGAGAAAGGATCAAAGACTGAATCAAACTG[C/A]AGAAGCTCCGGTGATGGTTCCGCCGACCA	Zhou et al. 2014
Ahsnp746	[C/T]	AGCTCCTCTGGTGGGGCCATGTGGAAGTTGGCATGCTTTTTGATGTAAAGCTTTGACTTTGTATTTGCT[C/T]CGTTGTTGCCTCCAA	Zhou et al. 2014
Ahsnp773	[G/A]	AGCTCCTTCATTCACTGATTCAC[G/A]TGGTTGCGCAACCAAAGTAATGATGCAAAATATAAATGGAAAAGAATAAGTAACCAACAAG	Zhou et al. 2014
Ahsnp820	[G/A]	AGCTCGACGCGAGTGGCCGCAAATGGTGCGGCGATCAGAGTTCGGACAAAGGAGTTATGGTGGTTTATGTTGATGGTGAGG[G/A]TTA	Zhou et al. 2014
Ahsnp1108	[C/T]	AGCTCTCTGCCGCTGTTCTGCTTG[C/T]CGGAAGTCACCACCGTAGCTACCACTGCTCCGTTCTCTCACTTATTCATAAGTACAGTAA	Zhou et al. 2014
Ahsnp1224	[C/T]	AGCTCTTGGTAGGCGCTCTGTTCCATCAAAGGCTTGACGCTCCTTTTCCCGTC[C/T]GACCTCTCATTCTTCTCTCAACTCTCTTATT	Zhou et al. 2014
Ahsnp1319	[C/A]	TAAGACATACCTTCTCTAT[C/A]TCAATTAGCCATTGGAGTTCATCATCACTATCAAAATCATACACACATTCGAACTGAAAAGTGAG	Zhou et al. 2014
Ahsnp1578	[G/A]	TAATGCC[G/A]CTTCTCTTATCTGGGCTTGCTCTCGGACTTCGGGGAGCAATTCGAGTTCCTCTTTGTGCCCCCTGTATGTTTCCGAC	Zhou et al. 2014
Ahsnp1581	[C/A]	TAATGGACACATTGCCAATGGTGCAGTGCAAAAAGAAACTCCCAGGATCCTTGAGCTTTGGTGGAAGG[C/A]CTTTTTGAATCACTGT	Zhou et al. 2014
Ahsnp1908	[G/A]	TAAC[G/A]TTGCTTGATCAATCAATCCATGTGGGATTCGACCTCACTCTATTGTGAGTTTTTACTTGACGACAAATTCGGTANNNN	Zhou et al. 2014
Ahsnp2038	[C/T]	TAATTTGAAAGGTGGCTGGGGCATTGCATAGCCCAAATGGCATTCTT[C/T]TATAGGCAAAAACTCCAAATAGACATGTGAATGAGCT	Zhou et al. 2014
Ahsnp2055	[A/C]	TATCACTACTCCGAGTTATA[A/C]AATCCAAATGGCGAAAGAGTGATACATCATCCATAGGGAGGGCACCGTAGGGACCGATCTGCTG	Zhou et al. 2014
Ahsnp2	[T/C]	TAATAAAACAAAAACAAAAA[T/C]ATTCTAATTCTTGTTTATCTTCTCTACTTCTAATCCCTCTCATCTCTTTATTCAAATTCTTCTT	Zhou et al. 2014
Ahsnp65	[C/T]	AGCTCCC[C/T]AAGCAGAGTTCTTCACTGGTGCGAAACGCTCATGCTAGACCGTAAAATCAGTTCCACGAGGGGTGATTTTAGGGTTA	Zhou et al. 2014
Ahsnp87	[G/A]	AGCTCGGCGATAACAACGACGCGGTGGGAGCTGCGGTGGTCAAACCCGTCGCTGCGGTG[G/A]CAATCTGAAAGGGGATGGATCCAAG	Zhou et al. 2014
Ahsnp92	[A/G]	TAAAAACAGAATCAAAAACAGCAGAAGAAAAATCACACCCTGGAGGAAAGGC[A/G]GACTGGCATTCAACGCCAGTAAGGAGCATCTG	Zhou et al. 2014
Ahsnp192	[G/A]	AGCTCA[G/A]CACTGATGGCTTGGACAAAGCATGAGAAGATCCTTCCCCAGGGACTTTGGTCGAGATGTTTTGGACTGCCATAGCCTT	Zhou et al. 2014
Ahsnp254	[A/G]	AGCTCAATGTGCATTGTCGTTCTTCAAGCTTGGGTTTTTGATAGAACAACAACAACAACAACA[A/G]CAGCAGCAGCAGCAGCAGCAG	Zhou et al. 2014
Ahsnp266	[C/T]	AGCTCACACTTGTACGCGCACACGCATCTCTTGTGCGCACGCACGGATGCTGGAA[C/T]TTCGAAACTCCATGTCTTCATGGTTTCTT	Zhou et al. 2014
Ahsnp301	[G/A]	AGCTCACGTGACGCGGGTCACGCGTACACGTGTGTCACACGTACGC[G/A]TCACTTGGCGAAATACACTCCCACCCGTATGCGTCGCC	Zhou et al. 2014
Ahsnp359	[A/G]	AGCTCAGGCTCAGGGTCTGCCTGATCCGCA[A/G]GCTGATCGGGGGGCTGGGGAGGCACCGGCCTATCATGAAATGGGTGAAAGGGAG	Zhou et al. 2014
Ahsnp463	[G/A]	AGCTCATTCACATGTCTATTTGGAGTTTTTGCCTATA[G/A]AAGAATGCCATTTGGGCTATGCAATGCCCCAGCCACCTTTCAAATTA	Zhou et al. 2014
Ahsnp469	[G/A]	AGCTCATTGAAACGAGAATTTTGACACTAATTTCGAAGAAAACT[G/A]TCCGAAAATTGGACTGAACGAGTCAAAACGATTGAACCAG	Zhou et al. 2014
Ahsnp631	[C/T]	AGCTCCCTTGGTCTACCAA[C/T]GTTCGATGGGGATTAGCATTGGTGGGTATGACGGTAATGACCATGGGGCAATCATGCCCCGAGAT	Zhou et al. 2014
Ahsnp682	[G/A]	AGCTCCGTAGCTCAAGTTATGA[G/A]TTTGAGAAGATAATGATGAATAGTGCTCCTTCTCTCTTCTCCCTCTTTTGCTTTCAGCTGGT	Zhou et al. 2014
Ahsnp689	[C/T]	AGCTCCTAAAGTTGTGGCATGCATGTAACATAAAGAGATATTACAGTTAGAAAAGTGTA[C/T]CTTGCTCCCTTGTGTACTCTTTTTT	Zhou et al. 2014
Ahsnp724	[C/G]	AGCTCCTCCAAGC[C/G]TCGAACAGAGAAGCCAGCGAGGATGAGGACGACGTGCCGAGCTAGGAGACAGGGACTGGGTTCGGGACACG	Zhou et al. 2014
Ahsnp762	[C/T]	AGCTCCTGCATATGTAGCCTCAAATCAATGCCTTCCTCGGACTTGACGGCTCGA[C/T]TGGTGGCAAAGGTGGACGATGACCTCTACC	Zhou et al. 2014
Ahsnp775	[G/A]	AGCTCCTTCCACACA[G/A]ATATCCTTGAGGACAGGGTTCAACCTTTGATCAAAGTTGACTCTTCTAGTGAAAGGATGAGAATATCCT	Zhou et al. 2014
Ahsnp784	[C/T]	AGCTCCTTGATGTTATAGGATCCAACTAGCTTGAAGGAGAAGAGTAACCATGTCT[C/T]CTTGATCTTTGGGTATAGTAAGTTTCTCA	Zhou et al. 2014
Ahsnp829	[G/A]	AGCTCGAGATTGGGTTGAAGTTTCTCAACCGGGAAACA[G/A]CGATGCTGGCAGTCAAAAACTACAACATCCATAGGAGTACAGAATA	Zhou et al. 2014
Ahsnp897	[C/A]	AGCTCGGAGACGTGTGCGTGCACATAGCTACCTGTGCGTACGCACAGC[C/A]ACCCAAGCAGAGCGCGTGGATTACATTAAGCGCGTC	Zhou et al. 2014
Ahsnp960	[C/T]	AGCTCGTATACCCCATGATGATTGAAAGGAACTATCATG[C/T]AGAGCCTCTTCTTGCACCTCCGGCTCATATTGTCCCATTCGTGAT	Zhou et al. 2014
Ahsnp1051	[G/A]	AGCTCTATCAGATCGGTTTCGGGCCTTTGGTAGAGCGGATCAGGTCGAAACCGG[G/A]TAACCGGATTCGGGGACCATTCCAAGTATA	Zhou et al. 2014
Ahsnp1094	[C/A]	AGCTCTCTAGAAAGATGCAAGGGTTGTGGTTAG[C/A]CCCAGTTTTTCCAGTCAAGATTGGAACTCCCTGGGGAGATGCAAAGGTCGT	Zhou et al. 2014
Ahsnp1163	[C/T]	AGCTCTGTTGAAAGCTTT[C/T]GATCTTCATCGAATTGAATAATTGTCTCGGAAGAGAAATTGTTCGTACCTGGAGTTCCTCGGAACC	Zhou et al. 2014
Ahsnp1273	[C/A]	AGCTCTTTTTGTCCTTGAAAGATTGAACGGAGTGTTTCAT[C/A]TTGGTTGGAAGATGGAGGGTAGGGGATTTGAGGGGCTTGTGGTT	Zhou et al. 2014
Ahsnp1289	[G/A]	TAACTCTTCGCGCAGTTTTATAATATTCTTCACCAACAATCCGAGGTT[G/A]GAAGCATAGTTGACATTGAATCTAAAGGATCTAC	Zhou et al. 2014
Ahsnp1393	[G/A]	TAAAAGTACATCATCTCGGACATTCTGTTCCCGAGATATATGTCGGACCTCATATCCCCC[G/A]AATTGTCCGAGATGTTCCCTGATT	Zhou et al. 2014
Ahsnp1707	[A/G]	AGCTCCTCCCCCTCAACCATGGGGTTTAGAGCCTCATATCGTAGACGATACA[A/G]TATGAAACGTGTACTGTGTCATGTGATCCGGA	Zhou et al. 2014
Ahsnp1739	[A/G]	AGCTCGTGGCCTGCATATGACTAGACATGCATCATCCTTGTTTGTGTATATTATTCTGTTGTGTATTCTGTGTGTAT[A/G]TGTGTTC	Zhou et al. 2014
Ahsnp1771	[C/T]	AGCTCT[C/T]CTCAACCTTTGCCGCTGTCGTCTCTCGCCGGCTTCCATTTCGCTACCGCTGCCGCTCGTTAGCCTCTATCTCCACTCC	Zhou et al. 2014
Ahsnp33	[A/T]	AGCTCCTACAACAATTTCAAAATCTGGAACTCAACTTTGGCCATCGACGTGTACGGGTTAGGGACGCGT[A/T]CGCGTGGGTGTAGCA	Zhou et al. 2014
Ahsnp34	[G/A]	AGCTCATG[G/A]CGACTAGGGTGCAAAATTCATGGAAAGTTTGTATTGATTACCGGCACTTGAATCTAGCAACCCGGAAGGATTACTA	Zhou et al. 2014
Ahsnp219	[T/C]	AGCTCAAGCGTTCCATTGAATCTTCAAGAGAAAGAACTAGC[T/C]GCCATCACTAAGTGGACCTGTTCTTTGATTTCCTTACTCTTAT	Zhou et al. 2014
Ahsnp446	[G/C]	AGCTCATGTTTGACCTCAAACGTGGATGACAGCAACTT[G/C]GCCGAGCTGCATAATGCCACACACGAAGACGTTTGAGTCAACGTTT	Zhou et al. 2014
Ahsnp453	[T/C]	AGCTCATTACCTGTGATAGGACTAGACATGCAT[T/C]ATTCTTGTTTCCGTATTTGCATTTGATTATGTTTGCTTATCTTGGTTTTCT	Zhou et al. 2014
Ahsnp516	[G/A]	AGCTCCAAGTCTTTGGCGCCATTGTTGATGATCACAATTTCGTATACCATAGTGCTAATGTAGATGCTAT[G/A]AAAACTTCCAGGTT	Zhou et al. 2014
Ahsnp930	[G/A]	AGCTCGGCTTATAATGCCCTTATTGGTCGAACAACACTAAACCAACTCGCCACA[G/A]TAGTCTCCACTCTACATCTGTGCATGAAGT	Zhou et al. 2014
Ahsnp958	[C/T]	AGCTCGTACTATTGCTCCGCCTCACCACCACCACATATGGCCCCCTCGACCCGAAATTTTTGAAGATCGTCCTTGCCCAA[C/T]CGAG	Zhou et al. 2014
Ahsnp1078	[A/C]	AGCTCTC[A/C]ATTTGGACTTCTGTAGTGCCAGAAATACTCTTCTGAGTGCAGGTAGGTCAGATTTGGAAAGCATCTACAATGGTTTC	Zhou et al. 2014
Ahsnp1109	[G/A]	AGCTCTCTGGTACGCGAAATCATGATTATTCATTCCCTGGCTATAGC[G/A]TCAAAAACTTGGTGTGGGAGAACGTGATCTCAAGACT	Zhou et al. 2014
Ahsnp1140	[G/A]	AGCTCTGCTGAGTCCTATGGAAGGGTGCAGAAATTATAACAAAATGCAATAGACAATAAACA[G/A]TGGCAAATACCTCAAAATTGCA	Zhou et al. 2014
Ahsnp1201	[C/T]	AGCTCTTCTAAAGTTCCGACTTCTGCCGCCAAAAAGATCCCTTCAACCCTT[C/T]TGATTCCTGCAGCAGACCCGAGTTCCACTCCTC	Zhou et al. 2014
Ahsnp1310	[C/T]	TAATACAATTTCACTGCAATTTTGAGGTATTTACCA[C/T]TGTTTATTGTCTATTGCATTTTGTTATAATTTCTGCACCCTTCCATAG	Zhou et al. 2014
Ahsnp1533	[C/T]	TAAGGCTTCCTCGCGGATTCGGGCTCTTTCTCGGACCTCGGGGAGGAGGT[C/T]GAGTTCTTCCCTTTGTGCCTGCGGGTTATCTTTC	Zhou et al. 2014
Ahsnp1588	[G/A]	TAATGT[G/A]ATGATCAAGTGACACTCATCATCATTCTCACTTATGAACGCGTGTCTGACAAACACTTCTGTTCTACATGAAAACAAG	Zhou et al. 2014
Ahsnp1675	[G/T]	AGCTCATCCGAAACTTTCACAGTGTCCGGCAACACTTCCGACATAGGGTCAATAGAATCTCGGATATCAATCTGGA[G/T]CACGTAGA	Zhou et al. 2014
Ahsnp1701	[G/A]	AGCTCCTATA[G/A]GTTTTATGGGCATACCGAACAACGCCACATTCCACCACAAAGGAATCCCCCTTCCGCTTAGCATATGGAATGGC	Zhou et al. 2014
Ahsnp1783	[G/A]	AGTTCGGCGATGACAACGACGCGGTGGGAGCTGCGGTGGTCAAACCCGTCGCTGCGGTG[G/A]CAATCTGAAAGGGGATGGATCCAAG	Zhou et al. 2014
Ahsnp1817	[C/T]	GAATAGGTTGGTTCGGTTGGACCGACGGTCCAATTTGGGTCTGGTTCAATCGGTTTGACTCGTTCAGTCCAATTTTCGGA[C/T]AGTT	Zhou et al. 2014
Ahsnp1833	[G/T]	TAAAAGAAGCAGCAGCTTCTTCTTCTCCATTTTGCATCATAAGCGCTGAACAGCGTTAGAGAGAAAGGGA[G/T]TTTCCCTAACCCTA	Zhou et al. 2014
Ahsnp1849	[C/T]	TAAAC[C/T]CAATTTTCCCTTACCAAATGAAACCCTAGCCATTATCTCTCTTTTTTCTTTAGCCAACCTACCCAAAATACAACACCAT	Zhou et al. 2014
Ahsnp1986	[G/A]	TAATCC[G/A]GAAAATGTGAGGTTGGCGTTCAACTTGCCAATGATGGAAGAGAACGCACGCCCCTACACAAGAAGAGTCAACTTTGAT	Zhou et al. 2014
Ahsnp2022	[G/A]	TAATTCCATGTTGTTTAGTAGACAAATAGCA[G/A]AATACCGAGAAGTAGTAAACAGAAAAAATAGATAAATAGAGAAAATAGAGAAA	Zhou et al. 2014
Ahsnp202	[C/T]	AGCTCAACCTCCTCCCAGATGTTTGATAA[C/T]AAGCTCAGATCAAAGAGAAAGCAGTAAAGCAGAGGATGGCCCTAAGGTATAATCA	Zhou et al. 2014
Ahsnp388	[A/C]	AGCTCATCAACAAAGCTAATGGATATAGACTCACTGCAAGAGGAGAGGACTTCAAG[A/C]ACTATCAACCTCTTTGACAAGAACCAAA	Zhou et al. 2014
Ahsnp491	[T/G]	AGCTCCAAAAGTGATGTACGAAACCGTTTCTTCTTCTTGTTGTTGTTGTTGTTG[T/G]TGGTCGGAGGTGGAGCAATGGTGCCATTAT	Zhou et al. 2014
Ahsnp499	[A/T]	AGCTCCAAATTGAAAGTTATT[A/T]GGGATTTAGTGTTGTGATAAATAGTGATATCTTCCTCCCTTCTTTTCTCACCGTGCCCTCACT	Zhou et al. 2014
Ahsnp521	[C/T]	AGCTCCAATCTCTCTAGCTAGC[C/T]TCAAACCACTTAGTAGTGCCTCATATTCCGCTTTATTGTTTGAGGAAGGGAACCCGAATTTG	Zhou et al. 2014
Ahsnp541	[T/C]	AGCTCCAGAATTATTCCTCTCTGGATTCTTACTA[T/C]CCTCATAGGGATTTTGGGTAGCAGCTTGTTCATTTATTGGCTTACTGCTG	Zhou et al. 2014
Ahsnp715	[G/T]	AGCTCCTCACCCCCAACCATGGGGTTTAGAGAAATGAGTAAATGACATAAAAATCCACTTCCGGGGTCCACTTGGTGTGT[G/T]CTTG	Zhou et al. 2014
Ahsnp950	[C/A]	AGCTCGGT[C/A]TTTATTTGGAGGTCGAGTCTTAGTTTTAGTCTTAGTTTGTGGATTTTATCTTTGTAGAGTTCTTTTTTGAATGCGG	Zhou et al. 2014
Ahsnp1067	[C/A]	AGCTCTCAAACGTGAATCACACTTCGTCACAATTCCGCACATAAATGGTCATCTTGTAAATCTCAGTCAGG[C/A]GGATTCAAATGGT	Zhou et al. 2014
Ahsnp1134	[C/A]	AGCTCTGCCACAACATAGAAAGCATTTTTGAGATGGATGACACTAAGAGCTGGGAATCATCATTC[C/A]AACTGAAGAAGCTAAGTTT	Zhou et al. 2014
Ahsnp1137	[G/T]	AGCTCTGCTACAAAGCGGTAAAGGTTTCCACCTCTACTAGATTA[G/T]CTTTCCCTCATCACATCTTCTGTATGTGTGAGGCAGCCTG	Zhou et al. 2014
Ahsnp1204	[T/G]	AGCTCTTCTCGTCTCTGAATTCCACCAAGTTCTATTGTGTGGCATTCTTCTCCTGCCCCTCTGAGGTTTA[T/G]ACTTTCGTTGTAGC	Zhou et al. 2014
Ahsnp1513	[G/T]	TAAGAAGGCAAGGAAG[G/T]CTATCGCGGCTCAGAACATCCCGGCAAAGGTGGTCGGGGAAGGGACTTCCCATGTTTTATCGAAACCG	Zhou et al. 2014
Ahsnp1534	[G/C]	TAAGGCTT[G/C]GCACAGTCCTCCGTGCCATTAGTAAGGAACAAGGTGGGGCTAGTAGCACCACCTCCACTGACAGGCTCGTTATGGC	Zhou et al. 2014
Ahsnp1694	[G/A]	AGCTCCCTATTATGGGGGCTTGATCTTGAACTCATCCAGGCATCTCCACCAATGTTTGTGATTCCA[G/A]TAACCTCTGGGGACCCAA	Zhou et al. 2014
Ahsnp1813	[T/C]	GAACTCCAGGAAAATTTTCTACACATGAAAGCTTCAATACTCAGCCCAAGCA[T/C]ACACCAAGTGGACCCCAGAAGTGGATTTTTAC	Zhou et al. 2014
Ahsnp1841	[C/T]	TAAACAACCTTTAGCTTTGAAGGGTGTTGGCTCCTTCTATCCGTGGGATGTCTGGCGCTTCTGGGGATAGCTTCTGGCA[C/T]TTCAT	Zhou et al. 2014
Ahsnp1909	[A/G]	TAACGTTGTCTGACCTATTAGGGCATTGTAGGCT[A/G]AGCTTACTTCAACGACGATGTAATCTATTTTGAATGTTCTTGACNNNN	Zhou et al. 2014
Ahsnp2018	[G/T]	TAATTATCAATCCGCCATAACCATTTGAATCC[G/T]CCTGACTGAGATTTACAAGATGACCATTTATGTGCGGAATTGTGACGAAGTG	Zhou et al. 2014
Ahsnp44	[G/T]	AGCTCGTAGCCTAAACCTAGGAAGTTTAGTGACTCATACTGATAGAAAAACACAATGGAATTCATATGCCAGAA[G/T]AGATTGAAGG	Zhou et al. 2014
Ahsnp84	[G/A]	AGCTCATAGCCAGTAGGAAAGGCATGCATTATACT[G/A]CATTTGTTTGAAATTGTTTGGGTGTGTTATAATTACTTGGTTTGCCTAA	Zhou et al. 2014
Ahsnp142	[G/T]	AGCTCGGCACAATTGCAGATGATATTTACTTGTGGACCATA[G/T]CTCGGTTAGGCTTTTTCAAGCTGATGTTATAACATTGGCGAGC	Zhou et al. 2014
Ahsnp261	[A/T]	AGCTCAATTGTGTGGACCTCCTTACCTTTTCC[A/T]CTCAAGTTCATGCTTTCATTGGAGTATTTTATTGCCCATTTCTGGTCTCCCC	Zhou et al. 2014
Ahsnp287	[C/T]	AGCTCACCGAGTTCCGCCAAAACGAATATTTGTGCAGAGGAACTGACTAGGAATCCAATTATGA[C/T]GTCTTCGTCCCAGCCCCCTA	Zhou et al. 2014
Ahsnp318	[C/T]	AGCTCACTCTTTTTCAAAAGAGTCGTATCTGCTCCCTGAACTGA[C/T]ATCGGAATACAAACTCAATTCGATATCTTATCGAACAATA	Zhou et al. 2014
Ahsnp328	[C/A]	AGCTCAGAGAAGGGGCACCGTTCATG[C/A]CCTAGGTCGAGCTGTACGACCCGGGCAGATCAACGACAAATTGACCAACCTGTTCAGA	Zhou et al. 2014
Ahsnp412	[C/T]	AGCTCATCTGCGTCACCTCACCCTAGCCGTT[C/T]GCAAAGTGGGGCTCGACCTACTTGGACCATTTCCCCAAGGATCAGGACAAGTC	Zhou et al. 2014
Ahsnp436	[G/T]	AGCTCATGGCCTGCATAGAACATACATGCATCATACTTTTTTGCGTATGTTTTTTTGTGATTATGTGTGTGT[G/T]CTTATTGACTTA	Zhou et al. 2014
Ahsnp468	[A/G]	AGCTCATTCTTTCT[A/G]ATTTTGTGCCTAGTTTTCTCGTTTTCTGCCCCGAATTTGCAGTTTCTTCTCCCTTTTGCTATTCTTTCTA	Zhou et al. 2014
Ahsnp574	[G/A]	AGCTCCATTTTGATAAATCCTTTTGTGTAGAACCCCGAGCTTGTTCGGAGGTCTAAGTCTTTTATG[G/A]AATAAAAGTATGAATATT	Zhou et al. 2014
Ahsnp638	[C/A]	AGCTCCGAGATATACGAGTTTGGGAGGAATTGAGA[C/A]CACGGCCAAAAGTAAAAATTGAAGAGGCCTAGATTGGGGATGAGGCCAA	Zhou et al. 2014
Ahsnp838	[A/G]	AGCTCGAGTTATCTGAA[A/G]GAATATCAAGCTCGAAAGAAAGAAAACAATTTTGAATTGTATACATAAGAAATTGAAAAGATACATT	Zhou et al. 2014
Ahsnp902	[G/A]	AGCTCGGATGGAGTGGGAGGAGGTACATCA[G/A]CCATTGGGGCCTTTTCAATTTTTCGGTACCCACAGTGGACGCCAAATGTTCTTG	Zhou et al. 2014
Ahsnp905	[T/C]	AGCTCGGATTGAGGGCAGCATCTG[T/C]GAAGCATTCCTAGATAAGAAAACAGTTGCATTTTGATCATTGTATTTCAGTCTCATGTAG	Zhou et al. 2014
Ahsnp910	[G/A]	AGCTCGGCCAAATCACCA[G/A]GAAAGCCTAAAAAGGGCCCAAATAGAGGACCGCGCCCCAAAACCCAAGCAGCCCAAACCTATGGAA	Zhou et al. 2014
Ahsnp1009	[T/G]	AGCTCTAATCATGTTATTTGGTCTGAGCTTTGTGTTGTTCTCCAGCAAATCATCCGCTCGGATATAGGATAG[T/G]GTTTATTTGTTT	Zhou et al. 2014
Ahsnp1144	[G/A]	AGCTCTGGACTGAGTGTGAGAGAGGTAGAGAGTGCATTCCTG[G/A]AGTCTGGAGTTAGGGCTGGACTGGAGTGGAGTAGGGAAGTTA	Zhou et al. 2014
Ahsnp1173	[G/A]	AGCTCTTCAAAACAAGAAGTTTGATACCAATTTCAAAAAATTTGGTCCGAAATTGGACTG[G/A]ATTGGCCGAACCGATTGAACTGGG	Zhou et al. 2014
Ahsnp1219	[C/T]	AGCTCTTGGAGAAGATCAGCCTGTTATCTCTAGAGTAACTTTTATCCGTTGAGCGA[C/T]GACCCTTCCGCTCGGCATCAATCTTCGG	Zhou et al. 2014
Ahsnp1495	[G/A]	TAACTGTAGATAG[G/A]CTCACTGTAGCGTTTTAGTGTTAGTTCCTGTTTTTCCGACCTACTGGCCTTACGGTCTGACCTTGAGTGGT	Zhou et al. 2014
Ahsnp1498	[G/A]	TAACTTAGTGACATCTTTCTGCACCACTTCCTTCATGGCTGGATTCA[G/A]CCGCCTTTGTGGTTGAACCAATGGCTTGGCATCACCC	Zhou et al. 2014
Ahsnp1583	[A/T]	TAATGGCACCTAAGACCGGAGAAACCTCTAAAAAG[A/T]GGAAAGGGAAGGCAATTGGTTCCACCTCTGAGTCATGGGAGATGGAGAG	Zhou et al. 2014
Ahsnp1738	[G/A]	AGCTCGTGCCCCGAGGTGGTTGTC[G/A]CACATGCCACTGTGGACTTCTTCTAAAACTTCCCTTGTAGCGGAGGTCGGGATGCATCTT	Zhou et al. 2014
Ahsnp1764	[T/C]	AGCTCTGGACACCTCTAACTGAGGACTTTAGCAAAGCTGAGTCGCCACCTGAAAAGGTTCAC[T/C]CAGGCAGGTGTTTGTGGCATTT	Zhou et al. 2014
Ahsnp1787	[C/T]	CAATGATGAGTTACTA[C/T]AATCTATTGATCAGAGATAGCAGGCCATGGAAAACAACCTTACTTCTACTCTAAATGGTCTGAACT	Zhou et al. 2014
Ahsnp1893	[G/A]	TAACACCAGGAACAGCCTATGCACATGTGAAGCTCAATGCTCAGCCCAAGCACACACCAAGTGGGCCCC[G/A]GAAGTGGATTTCTGC	Zhou et al. 2014
Ahsnp1896	[C/T]	TAACAGATTCATGATTCTTTTCTTTTCTAATACACGAACTCTGTCAAACTGATCCAAACTTTA[C/T]CTGAAATAATCAAAAACCA	Zhou et al. 2014
Ahsnp43	[A/G]	TAAAA[A/G]TCACATTGTATACAACCTAGCCGTAAGACTTATATGCATACCGTATGCATCTGGAAAGCCATATCTGGGACTCGTGTCT	Zhou et al. 2014
Ahsnp76	[A/T]	AGCTCTATTGTAATTCAATCGATCAATAACA[A/T]TTTTCATTCTTCTTCCTCTATCTTTCTCTTGATTTTGTTTGAAAGCTTTCGAT	Zhou et al. 2014
Ahsnp78	[T/C]	AGCTCTGCTGTACCTCGAGGTCAA[T/C]GCAATTACTATTGTTCTTCTATTCAATTCAGCTTATTCTTGTTCTAAGATATCACTTGTT	Zhou et al. 2014
Ahsnp95	[C/A]	AGCTCACTCTCACGGCGAACATCTCTCCTCATCATCAAAGCTAAAATGTCTAATCTAAG[C/A]AATCAAACAACTAATAGTTGTCAAT	Zhou et al. 2014
Ahsnp185	[T/C]	AGCTCAAATTTAGTAAATCCATTACTTGATCATTGAATCTACTATTCAACTCTTGTAATTACTTATCAA[T/C]TGTGACTAAAAATAT	Zhou et al. 2014
Ahsnp209	[C/T]	AGCTCAACTTGGAGCAAGTGGAATAACCACTACTGCTGCTACTACCCAGGCATCACAATCGACCTGGAG[C/T]AAGCGGGACAAACCA	Zhou et al. 2014
Ahsnp218	[G/A]	AGCTCAAGCCTCAACTGGTCACTTTGGTGTAACA[G/A]AATTGTCAATTTCATGGACTCCTGCAGGAGGATCGCAAAAAGTTCATATC	Zhou et al. 2014
Ahsnp268	[C/T]	AGCTCACAGAACTACTCCTACCCTTGTCATTCAACGCATCTCTTTCACTCCCACACT[C/T]TTTGCTATTGCTCATGATGGATCTAGT	Zhou et al. 2014
Ahsnp294	[C/T]	AGCTCA[C/T]GCTCTCCGGGGTGACGAGAGGGTTTGTTATATAAACCTTGACTCGCCCACCGTGCCAGACTGGATGTGGGGATACGAG	Zhou et al. 2014
Ahsnp355	[C/A]	AGCTCAGCTTGATGGAGGAGACAACCACCAGGATGA[C/A]TGAGGTGGTTGACTTTCCTTTTATGCTATTTTCCTTTTCGTTCTTATT	Zhou et al. 2014
Ahsnp510	[G/A]	AGCTCCAAGGATTCTTCTCT[G/A]GGTTAGATAACTGGCATGCCATGCCCAACCTTGGCGTGCCACGCCCATAGTGAAGCTTCAAGGG	Zhou et al. 2014
Ahsnp535	[T/C]	AGCTCCACCTTTTTTCTGTCTTCTTCAG[T/C]CCAACTGGCTTCACCTTTGAGAGAGACTACTCCTGCAGCACTTGTAGCGGTTGGAA	Zhou et al. 2014
Ahsnp551	[G/A]	AGCTCCAGTACTCCGGCAACGGCGCCAATGTTCCGAGGGTTACCTAAAACGGAAATTTGGGTCC[G/A]AACCTGAGGTCCATACTCAT	Zhou et al. 2014
Ahsnp569	[C/T]	AGCTCCATTCGGACTT[C/T]TGTTGCTCCAGAAAAGCTCTTCCGAAATGCAGGTAAGTCAGATCCGGACAGCACCTGCAGTGCTTTCT	Zhou et al. 2014
Ahsnp717	[C/A]	AGCTCCTCACTCCCAACACTGGAGTTTAGAGA[C/A]TCATTCCGTCAAAGAGTATAAAGTTCAGATCTAAAAATGTCATGAGTTACAG	Zhou et al. 2014
Ahsnp756	[G/A]	AGCTCCTGAGCTTCTTTGGGTGTTTTCAACATGTGTAAGGAGCCACCTGCAGAAT[G/A]ATCCAGAGATATTTGGGCTGCTACAAATA	Zhou et al. 2014
Ahsnp971	[C/T]	AGCTCGTCGCCGGAAAGAGGAGTAA[C/T]GGTGGTGTGTTGCCGCTGCTGCCGTTGCTGGGGAAGGAGGGTACCTTCGAGCTATGTGC	Zhou et al. 2014
Ahsnp1093	[T/G]	AGCTCTCTAACTGAATGAAAAGAGTTAGTTTTTCATTGCTCTACCAAAA[T/G]AGAAAAGAAATAAAGTGCAAAAAAATAAAGATGAA	Zhou et al. 2014
Ahsnp1111	[C/T]	AGCTCTCTTAGTAGCTAGGAGTGGTCTTC[C/T]TAGGATTATAGAGGCGTTTTCATCCTGCCACATATCAAGAATTACAAAATCTGTT	Zhou et al. 2014
Ahsnp1190	[A/G]	AGCTCTTCATCAGTCGGATGGAACCT[A/G]AAACCCGGTGGAACATGACAAAATGTATTCATCTTCTCTCTATCTGATTCTGATCAAT	Zhou et al. 2014
Ahsnp1298	[T/C]	TAAAGGATCTCAGAAGCTGTTTGG[T/C]CACTACAGTGAGAATTCGAATTACTCACCACCCGGCTGGAAAAATGCAGATCAAGACAAA	Zhou et al. 2014
Ahsnp1323	[C/T]	TAATTATGGGAGTCATCCATCATTGATC[C/T]AGACCTGTTATGGCTAGGACTTTTTCTTGGATGAGGCTTCTATTGTTGCCCCTTGG	Zhou et al. 2014
Ahsnp1344	[C/A]	TAATATAAAAACTACTTTTAGAGATTCACTTTGGACCTCATGACATTTTTACATTCCTTATTGTACCTTTGACGG[C/A]ATGAGTCTC	Zhou et al. 2014
Ahsnp1468	[G/A]	TAACCACTGTAATTTTTATCTCTTTTACCAGGGGATATTAGTG[G/A]AAATAGCTATCTATTAGCAAGGGTATGAATGTCAACAGGTG	Zhou et al. 2014
Ahsnp1470	[T/C]	TAACCATTGATCAGAATCAGATAGAGAGAAGATGAATACATTTTGTCATGTTCCACCGGGTTT[T/C]AGGTTCCATCCGACTGATGAA	Zhou et al. 2014
Ahsnp1566	[G/A]	TAATCTCTGTTTGATGCTTTGTGTGCCACC[G/A]ATGACTGTTCAGGAAACTCCCATGGCATATTCCTCCCATGATAGAGGAAACAAT	Zhou et al. 2014
Ahsnp1617	[C/T]	TAAAGGCTGTCTT[C/T]GCCTAGTTTAGGATCCCGGAGGCCATTGGAATCACAAACATTGGTGGAGATTCCTGGATGAGTTCAAGCAT	Zhou et al. 2014
Ahsnp1645	[G/T]	ACCTCGGTCCTTTTTTCAAGATGAGAATGACGAACCTGCTTTTCCCTTG[G/T]AATGGCAAAAAGATGGGAGGGTCTCCAGGTATTAG	Zhou et al. 2014
Ahsnp1815	[C/T]	GAAGGCATTGTAGG[C/T]TGAACTTACGTTGACCACGATGTAATCTATCTTGAGTGTTCTTGACTGGTTTCCTTTTTCGAAAGTTGTG	Zhou et al. 2014
Ahsnp1868	[G/T]	TAAAGTGGATCCCAACGTCTGCCACAAAAGAGGTCCTGGAGGAC[G/T]TTCACAGCGGCATGTTCGGCAATCACCTCAGAGCATGAGC	Zhou et al. 2014
Ahsnp1955	[A/G]	TAA[A/G]TGCAGCAATAGTGGCGGACAACAAGGAGACAAGAACCCCGACAAGAGAACCTTCTTGACACTCGAAGAAGCTGGTTTGGTG	Zhou et al. 2014
Ahsnp1976	[C/T]	TAATATACATTGAAAACACCTCCTGCATGCTCGCTTCTTCCGTCACATATTTGGTTTGATA[C/T]TGGACGAATCCACCAAACACCGG	Zhou et al. 2014
Ahsnp2008	[A/C]	TAATGG[A/C]AACTAAGGCCGGAGAAACCTCTAGGAAGAGGAAAGAGAAGGCAGTTGCTTCCAACTCTGAGTCATGGGNNNNNNNN	Zhou et al. 2014
Ahsnp36	[C/T]	AGCTCC[C/T]AACAAGAAGAATGATGACCGGAATTCACACCCCATAAAAAAAATATTATGAATCCGTTCTTTGGCAAGCGTACCAAAA	Zhou et al. 2014
Ahsnp106	[C/T]	AGCTCCGATTGCCA[C/T]ACCGTTTGTGGCTACGCGTTCTTCGTGAGAAGCTCTACAAAACCCATACAAGAAACTGGGAAGGTAACCA	Zhou et al. 2014
Ahsnp229	[G/A]	AGCTCAAGTAGAAGAGAATA[G/A]TAAGATGCCAAAAACAGCTGGTAATTCCTCTGGGAATGCTGGTGTTCAGATGCCGGCAAATGCT	Zhou et al. 2014
Ahsnp308	[T/C]	AGCTCACGTGTCGGTTGCATACCTGCTCCCGACATTACCCGGGCACAAGTCCCAGATATGG[T/C]TAGGCCGCATACATTGTGAATTT	Zhou et al. 2014
Ahsnp330	[G/C]	AGCTCAGAGGCGAGAAGAATTCCGACCACGACCCGAAGGAGAAGTAGAAAGAGTCCAGATCG[G/C]AGACACCTTGGATAAAACAACT	Zhou et al. 2014
Ahsnp370	[C/T]	AGCTCAGTGCAGAACGCCTGGAGAGTTTGCATTTATTACAGGCGCCTCAACCAGGCCACTCGCAAGGATCACTA[C/T]CCCCTGCCGT	Zhou et al. 2014
Ahsnp375	[C/A]	AGCTCATAACAAGGAGACAGAAAATAAGAGTAAAAGGACAAGTAGCTCAAGAACAAAAAATAAAACAAAAAAATAAAAAA[C/A]CCCC	Zhou et al. 2014
Ahsnp409	[A/G]	AGCTCATCTAGAAGGTCAACCGACAAACCCAGAAGATCGAGCAAAATGAGCGTCG[A/G]AACAAGCGACGCTATGAATATTTGAAGAA	Zhou et al. 2014
Ahsnp473	[T/A]	AGCTCATTGGCCACACGGCAGGCATGCATCATTGACATTTGTGTATATTGTTTGGGTGTGCATCTTGTA[T/A]TTGGCTTGCCTAATT	Zhou et al. 2014
Ahsnp482	[G/A]	AGCTCATTTGTCAGTTATATAGCCAAACCCAACATGTCTGGCAGCTAATCCGAACACTGTCT[G/A]TAACACCCCAATTATCCTAAGC	Zhou et al. 2014
Ahsnp507	[G/A]	AGCTCCAAGACAAAGCGACTGGACAAATCAAAATAGAGGAGTTACGAGAAGCTC[G/A]GAGGACAGAGAAACCACCGTCTCGGAAGGA	Zhou et al. 2014
Ahsnp556	[C/T]	AGCTCCATACCAGTAG[C/T]CTGTGGTATATAATGGTATTGCAACAGAGTAAAGCTTTTCATTCTCCCCACAATACACCTCGTTCCTT	Zhou et al. 2014
Ahsnp563	[G/C]	AGCTCCATCACCTGCTTCGTCAAGTTGATGCCGTCCTCGGGATCAACGG[G/C]CCGGCTAGTGACAAAGGCGGAAGAATGTCTCAATG	Zhou et al. 2014
Ahsnp615	[T/A]	AGCTCCCGTCCTTGCAGGTCGGACACTTTGTTGTAGCCCTTTCCTA[T/A]GACTTCGACAATCTTGTAAGGTCCTTTCCAATTTGCAG	Zhou et al. 2014
Ahsnp737	[G/A]	AGCTCCTCGCGTAGCAGCTCCTCAGAACCATGGCGGC[G/A]GCATGATGACGACGCAGTGGCATGTGGTGGCACGATTTTCCCTCTCT	Zhou et al. 2014
Ahsnp755	[G/A]	AGCTCCTGACCAAAAAGAGGGATTGAAAGGAAAGTAAAACCGTGGTGCTTACTAAGGAATGTAGCACAATCATTCA[G/A]AAGAACCT	Zhou et al. 2014
Ahsnp813	[G/A]	AGCTCGACCCACAGTTGACCTTCCTA[G/A]TGCAACAAAATTGTCAGTTTCATGGACTCCCACAGGAATTCCCTAATAAATTCATTTC	Zhou et al. 2014
Ahsnp821	[G/A]	AGCTCGACGCGGTGGACGCGTGGCCGCAAACAATGCGGCGATCGAA[G/A]CTTGGACGGAGGAGTTATGGCAAACCGAAGTTACCGTA	Zhou et al. 2014
Ahsnp918	[G/A]	AGCTCGGCCAGATCGCCAAAGGAGCCCAAAGCAGGCCAAAAC[G/A]AAGGAACACAGCACAATCTAAAGGCAGCTAAAACCCAGAAAG	Zhou et al. 2014
Ahsnp924	[C/A]	AGCTCGGCGTCGCGATCGCATGGCGG[C/A]AAACGATGCGTCAATCGGAGCTTTGGATCAAAAGATATGATCAATTGAAGTTGGAGCA	Zhou et al. 2014
Ahsnp1031	[C/T]	AGCTCTACAAAGTTCAGTCACTAATTAGGTAAGAAAGTCACGTTTTCTTCCTCAATTTTT[C/T]GATTTCCAATTTCGAATTATTGGG	Zhou et al. 2014
Ahsnp1083	[G/T]	AGCTCTCCGTAGCAAAGTGTTTTGTCTTTGCAAGGTGGAAAT[G/T]GCGGGGAATTTAGAAAATCATAAAATCGGATCGAGAGTTTAT	Zhou et al. 2014
Ahsnp1112	[G/A]	AGCTCTCTTCTCCCTCATTCGAATTTGTCTCTTTCTCTAACCCTCTCTCCTCCAACTCTCTCTACCCCTCTCATCTCCCT[G/A]GCAG	Zhou et al. 2014
Ahsnp1113	[G/A]	AGCTCTCTTCTTTCTCGTTCTTGCTTGAGCACTTTTTACTTTTCTTGTTTGAGTCTTGGT[G/A]TGAAGAATTGAGGAATTTCTGTCT	Zhou et al. 2014
Ahsnp1343	[C/T]	TAACTAAACCTAATACACT[C/T]ATTTCAGCACTCTCTTCTCCTCACATAACACTCTTACATGCTGAAATTGGAGGCACAAGAGGAAA	Zhou et al. 2014
Ahsnp1355	[C/T]	TAAGAGTCGGAGTCTTTTGCAGGTACCCCCACCCTCCGGTGGACAAGGATCAG[C/T]AGTGCAGCAAGTCCAACAAGTCGGACACAAC	Zhou et al. 2014
Ahsnp1362	[C/T]	GAATGATGAGTTACTA[C/T]AATCTATTGATCAGAGATAGCAGGCCATGGAAAACAACCTTACTTCTACTCTAAATGGTCTGAACT	Zhou et al. 2014
Ahsnp1391	[C/T]	TAAAAGGTTTTTTAGAGTCCTTATTTTGGGACCTGTAAGACTTGTCTTCTTCCTTCCGAGACGGTGGTTTCTCTGTCCTC[C/T]GAGC	Zhou et al. 2014
Ahsnp1430	[T/C]	TAAACAGAAAAGAGCCAAGAAGTGAAGAGAGTTACTAGTGCTGGGGATGAAGATGAACACGAACGACTCTTCTGTGG[T/C]TGATCAG	Zhou et al. 2014
Ahsnp1447	[G/A]	TAAAGTATCGCCGAAGAGGAATCTTCTCCGGTAGAGAGTGCCATCACCATCG[G/A]AAGGGACAAACTGTGGGTACCATTGTTGCTTG	Zhou et al. 2014
Ahsnp1509	[C/T]	TAAGAAATCCATGAGATGCCTCAAGGGATA[C/T]ATTTTCCTCCACACAATTATCGGGAGCAACTCAACACCTCTTTGGAAGGCTTGA	Zhou et al. 2014
Ahsnp1525	[G/A]	TAAGCATCTGATCAATAAACGGCAGGGG[G/A]TAGTGATCCTTGCGAGTGGCCTGGTTGAGGCGCCTGTAATAAATGCAAACTCTCCA	Zhou et al. 2014
Ahsnp1544	[C/A]	TAATAACTATGGCTGAGTCAGATT[C/A]TACAATGAAATGCTTATACTTCTTTGCTGATGCAATTTGCAAGCCTCTAATTATTGCCCA	Zhou et al. 2014
Ahsnp1577	[C/T]	TAATGATGACTATATGAGTTGTTGAGGGTGATGATAGAAGTGCGGTGTATG[C/T]CGTGAGCTAAATGGCTGTATTTGAAATGATTAT	Zhou et al. 2014
Ahsnp1590	[C/T]	TAATGTTTCTGTACAAGAATTT[C/T]TGACTTCTTTGAGCAGTGGCACTAGCTATGGGCTCTGCCTCAATCCATTTTATGAACACCCC	Zhou et al. 2014
Ahsnp1824	[C/A]	TAAAAAAAAGTCAAAGTCTTATTCCTTTGATTCAAACCATATGTTGCCAACAGTCAC[C/A]AAAAAAAAACCATATGTTGCCAACCCA	Zhou et al. 2014
Ahsnp1843	[T/C]	TAAACAACTTTTAGAGACTTATCTTGTACTCATGACATTTTTCAGATCTGAATTACATACTTTTTGA[T/C]GGCATGAGTCTCTAAAA	Zhou et al. 2014
Ahsnp1872	[C/T]	TAAATAA[C/T]GTTTACAGACATTTCTTGTACCTCATGATATTTTCAGATCTGAATTACATACTTTTGACGGCATGAGTCTCTAAACC	Zhou et al. 2014
Ahsnp1911	[A/G]	TAACTAAGTCCAACCAATGGG[A/G]AGAACATGGCCAGTTACTTACAGTTTTGGCAAATTCAATTCTAGATGGAAGAGATTTGCAA	Zhou et al. 2014
Ahsnp1937	[G/A]	TAAGCTAACTTGATTCAACCCCCCTTCTCAAGTTCAACTAGATCCATCATGAGCAATAGCAAA[G/A]AGTGTGGGAGTGAAAGAGATG	Zhou et al. 2014
Ahsnp2012	[G/T]	TAATGTCAATAGCTTGACAGTGACTGTCATGGAGCCACAAGGTGATCAGGTCAATTTTAGTGTGTA[G/T]TCCCAACACCAAACTTAT	Zhou et al. 2014
Ahsnp99	[G/A]	TAAACACTTTATACTCTACACCACACCGAATATTATAACTCTTGATTGTCAGTACA[G/A]CTTCCTCTTTTGTTTCAAACCGTTGC	Zhou et al. 2014
Ahsnp181	[C/T]	AGCTCAAAT[C/T]ATCTCATTCAATATTTATCTTTATTATTCAATCATTTCATCTCATCAAGGACAGCCCTCAGCGTCAACCGACACC	Zhou et al. 2014
Ahsnp206	[C/T]	AGCTCAACGACGAGCCTCTTGGATAAGCAACCAAATAGAAGTAGTAAGGTCCTTCTTA[C/T]AGTAATTTTACTGTGGCATATATGGA	Zhou et al. 2014
Ahsnp212	[T/G]	AGCTCAAGAAGACGTCATAAATGGGGTTA[T/G]GATCAAGATTATCCATGAGTTCGGGTTCTTGGTTTTTCGGATAAGCGGGGAGAAG	Zhou et al. 2014
Ahsnp215	[C/T]	AGCTCTACAGCTCAAGATATGAGCTTGGGAAGAAGAAGATGAATAGTGCTCATGGGGGTTTCTTCTCCTTTTCCCTTTTAG[C/T]TGG	Zhou et al. 2014
Ahsnp238	[G/A]	AGCTCAATATCGGCTGTTTTGGAGGAACATGA[G/A]AAGACCCTTCCTCAGCCGCCTTGGCCGAGATGTTCTGGGCAGCTGTAGCTTT	Zhou et al. 2014
Ahsnp239	[C/T]	AGCTCAATATGGGCGTGGCACGCCACACATAGGCGTGGCACGC[C/T]AGTTCATTCATCCAGAGGAGAGGGAAAGAGCATCACTATGG	Zhou et al. 2014
Ahsnp354	[C/A]	AGCTCAGCTTATATGCCCTAATAGGTAGGATAACCTTGAACCAGCTCTGCGTAGTAGTTTCCACTC[C/A]ACATCTGTGTATGAAGTT	Zhou et al. 2014
Ahsnp386	[G/A]	AGCTCATCAAAACGAGAATTTGGACACTAATTTCAAGAAATTTGGCTCAAGATTGGACC[G/A]AACGGGCCAAACTTTGGCGAGCTAT	Zhou et al. 2014
Ahsnp431	[T/A]	AGCTCATGGATAGTAGGACAGGCATGC[T/A]TCATCTAAATTTATGTGACATTATTTGAGTTTGTTTATTGTATTTGGTTTGCCTATG	Zhou et al. 2014
Ahsnp458	[G/T]	AGCTCATTAGCTGTAGGACAGACATGCATCATATGCACTTATTTGTGTATGCATTT[G/T]TTTTGGCTTGCCTAATTACTTATCTGTG	Zhou et al. 2014
Ahsnp558	[C/T]	AGCTCCATACTTACTCCTGTATGATTGAAAATTCTGGCATTACGTTCCAACCAGATGTTCCAAATCACTGCAAAGAA[C/T]GCCGTCA	Zhou et al. 2014
Ahsnp582	[T/C]	AGCTCCCACAAGTCCTATGGGCATAT[T/C]GAACAACTCCACACTTCACCACAGGGAATCACCCTTCCGATTGATTTACGGAATGGAG	Zhou et al. 2014
Ahsnp587	[C/T]	AGCTCCCAGACACCAATTCTAAGTTTGGTGTTGGGCAGCCATTATCATGCACTGAAAACACTGGTACTAAGAAAAAAGTA[C/T]GTAA	Zhou et al. 2014
Ahsnp588	[G/A]	AGCTCCCAGCAGTGGTGACAATGACAGTTTGACGGCAACAGAGAGAGAAGACGAGAA[G/A]AGAGAGAGAGAGAGAGAGAGAGAGAGA	Zhou et al. 2014
Ahsnp672	[G/A]	AGCTCCGCTTTCTTGTTTGAGGTCGAGTCTTTAGACGTCG[G/A]TCCTTCTTACATGCTTTTCCTTCATTCACTTGATCCAATCTTTG	Zhou et al. 2014
Ahsnp794	[G/T]	AGCTCCTTTTTCTCTGTTTTTGTTGTGTC[G/T]AGGTCTTCTGTAAATGATTCCTCACCTTTAGTGTCAGTGAACTTTATATAAACAA	Zhou et al. 2014
Ahsnp818	[C/T]	AGCTCGACGATGCGG[C/T]CGCGTGTTCCGAATCAAAAGTTATTTGGATTTGAATATCTAAGCGGGGCTTTGAAGTTTGGAATGGGTT	Zhou et al. 2014
Ahsnp933	[C/T]	AGCTCGGGACAAACGGCTTCAACAAAACTTGGGAGGATCCTTCCC[C/T]GACTACCTTGGCTGGGACGGTTTGAGCTGCGGTAGCCTT	Zhou et al. 2014
Ahsnp1025	[C/A]	AGCTCTACAAAGCCCACTCAAGAAATCCTCAAGGTAATCATGAAACCTT[C/A]CCAGTTTCTCTCTTGAAAATTTCGGGTACTTAGGG	Zhou et al. 2014
Ahsnp1039	[C/T]	AGCTCTAGATATTATGGGTGATGTTCATTTTGTAACTCATATAACTTATTGTATATATTGTACAAATAAG[C/T]CATTGACTCCCTAA	Zhou et al. 2014
Ahsnp1064	[G/T]	AGCTCTATTGTAATTCAATGGATCAATAATAGTTCTTATTGTTCTTCTATTCATTCTCTTTGATTT[G/T]CTTGAAAGCTTTGGATCT	Zhou et al. 2014
Ahsnp1076	[G/A]	AGCTCTCATTCAACTTCGCAAGATGGTATAAACTGGCCATCTGCAAGTACCGAACGTACCTCTCATCCAAGC[G/A]CATGCCCTGCTG	Zhou et al. 2014
Ahsnp1099	[T/C]	AGCTCTCTC[T/C]CCCTTGAATCAGAGCAAGGAACAATGTGAGAAGTCGAATTTCAAGCATCAATCATCTCAAAACCTAGTTGATTCG	Zhou et al. 2014
Ahsnp1101	[T/C]	AGCTCTCTCTGCCGCTACTCTCATCCCATCTGCTC[T/C]CTTTGGTGCCTCTTCCATCTAATCTCATCCCGCTTTCTCAGCTCTTCTT	Zhou et al. 2014
Ahsnp1120	[C/T]	AGCTCTGATACCATAACAG[C/T]TGCTTGGCAAGAAGATAAAGAGGAGCAAAAATGTATGTCTGTATTTCTTATTCCAAAATAGAAAA	Zhou et al. 2014
Ahsnp1132	[T/G]	AGCTCTGCAGCGTCTCAATGAATAAATGCAATGATTTCTAT[T/G]TTCCATTCAAACACGCTTGTTCCAATCTAAGATATTCATTTGC	Zhou et al. 2014
Ahsnp1236	[C/T]	AGCTCTTTACAAGAACGCGTAGCCGCAAA[C/T]GGTGCAGCGATCGGCGCTCTATAGCTCAAGATATGAGCTTCAGAAGAAGATGGTG	Zhou et al. 2014
Ahsnp1243	[A/G]	AGCTCTTTCCACAGCATTTTGATCCTAGTGAAATACTGAAACACAGTC[A/G]TGGCACTTTGCTTTAGGTTTATGAGTTCTTTTTTTA	Zhou et al. 2014
Ahsnp1278	[C/T]	TAATGAAGGCATGTG[C/T]GTCTACCTATTCAGACGCATAGACGTGTGCGTCCACACACTCTGTGAAAAATCTCGACCCGTGCGTACG	Zhou et al. 2014
Ahsnp1279	[C/T]	TAAGAAGGCGGGAAAAGCTACAGCTGCCCAGAACATCTCGGCCAAGGCGGCTGAGGAAGGGTCTT[C/T]TCATGTTCCTCCAAAACAG	Zhou et al. 2014
Ahsnp1340	[G/A]	GAAACCCTC[G/A]CACGTTCCCAAAGCACCGATATAAAAGCGTGCGCTTTTAGAGGAAAAACGTTCTACATTCAAAAGCTTCTACA	Zhou et al. 2014
Ahsnp1397	[G/A]	TAATGTCTCGTGACTCA[G/A]GAAACTCCTTTATATGTCCACACTGAGACATTCATTCGTCTCTGCCATCAGCCAACCCATCGATCCT	Zhou et al. 2014
Ahsnp1423	[G/A]	TAAAATCAAAGTGCAGTGATGAATTAGG[G/A]CAACAAAACTAAAAAAATACCAGAGAACAACGACCAACCTCGGGACCGGCTACTTC	Zhou et al. 2014
Ahsnp1450	[C/T]	TAAAGT[C/T]GTCTTCCTAATGTAATCTTCCATACCTCTTGCCTTGTTCACCAATTCCGAGAATCCCCTAATCTCCAATGGAGCCCTA	Zhou et al. 2014
Ahsnp1521	[C/T]	TAAGATTTGGTTATAACTGGAATAGGCATCCATAAAACTTAGACATTGAAAACCGGAGGAACTATCAA[C/T]GAGTTTGTCAATGCAT	Zhou et al. 2014
Ahsnp1565	[G/A]	TAATCTCATCCCCA[G/A]CACACACTAAGTAGGCCCCAGAAGTGGATTTCTGCACTATCTATCATAGTTTACTCATTTTCTGTAAACG	Zhou et al. 2014
Ahsnp1611	[G/T]	TAATGTA[G/T]CTCAAACACAATCAATAGCAATGGCAAACCAATTACAATATGCACACCCAAACAATGTCATATAAATGCATATGATG	Zhou et al. 2014
Ahsnp1677	[C/T]	AGCTCATTGATACAGTTTC[C/T]AGAAATCAGCATCTATACCTAAGCAGTGCACCTTCCATCAACGCAGAGGCTAAACAAGTCACTGC	Zhou et al. 2014
Ahsnp1719	[G/A]	AGCTCGACGAGAGTTTCGCGTGGCAGTTGACGGCACGCGAATCGGATATCCAGAGA[G/A]TGAGATATAGCTCCAAAAAGAAGATAAT	Zhou et al. 2014
Ahsnp1732	[G/A]	AGCTCGTACCTGTTCTTTCACAGTTTGAGAGCGTTATGGTCCTAGCTTTCTACGCCTTTGTTGTACC[G/A]GCCGAGATCCCGGGGAG	Zhou et al. 2014
Ahsnp1866	[G/A]	TAAAGTAGGTGACAAGGCCGTAAGAGTATTGATTGCTGGAATGAATTCCGGGGTCCCAGACCTTGCTTTT[G/A]CACCCATCTTCTCG	Zhou et al. 2014
Ahsnp1894	[G/A]	TAACACCCTAAAGATACG[G/A]CACTATTTCAACGGTGGTTATTGGCTCACCACTATAAATACACTGACACCCCTCAGGAATCCCT	Zhou et al. 2014
Ahsnp2001	[C/A]	TAATGACACTCCTCCCAGTACTCTCCCAAG[C/A]AATACAGAAGAAAATCCCAAGAGAGAGTGCAAGGCCATAACCATGACCAATATG	Zhou et al. 2014
Ahsnp29	[G/A]	AGCTCGGAAAC[G/A]AAATCATCCAGTATTTGTGATTTCAAGGTCGGCCTTGACTGATATTGAATATCAAACTCGAAGAGTTCGATGG	Zhou et al. 2014
Ahsnp42	[A/G]	AGCTCCGCCCCAAACCCGAAGGTGAAATAGAAAAAGTCCGGATCTGAGATACCCCA[A/G]ACAAAACAACCAATATTGGTACTAACCT	Zhou et al. 2014
Ahsnp166	[T/C]	AGCTCAAACGTGGATCCCCATATGTATTCTTTTTGGCCAACGTTTGGCCCAACGTTTGAGGTCAAA[T/C]GTTGGCGCAAACGTGGCT	Zhou et al. 2014
Ahsnp184	[C/T]	AGCTCAAATTTAGATAGTGTGTTTTAGACGC[C/T]TCGTTTTTCGTTTTCACCATTCATATATTCAATTTGAGGTCTATAATTGGAGA	Zhou et al. 2014
Ahsnp227	[C/T]	AGCTCAAGGTCATCTCGGAGT[C/T]GCTCGTCTGCACAGAAGAGGGAACTTCTCTGTGAACATGGTGAGAGACTTGTGCAATAAATTT	Zhou et al. 2014
Ahsnp232	[G/A]	AGCTCTGGAGCTCAAGTTATTCTTGTTGGAAGTTACCCCTTCA[G/A]GCTGTGGGGAGTGACGTTTCCAGCAACGTTGGAGCACCAAC	Zhou et al. 2014
Ahsnp326	[G/A]	AGCTCAGACGGAGAAGTTACGGG[G/A]AATTGGAGTTCACCGTAAAGGTTAGGGGTTTTCTCTCTTCCCTGGATGCATTTCACGTTGC	Zhou et al. 2014
Ahsnp373	[C/T]	AGCTCATAAATCACCCCAGCATTTTCTGATACGTACAGCACGTGGCTCTGTCACGCGTACGCGTATGTCACGCATA[C/T]GCGTCGAT	Zhou et al. 2014
Ahsnp374	[C/T]	AGCTCATAACAAACATAAACAGTTTCTCAAGATACATAAATAAGTGCTCAT[C/T]CTCTGAAAATAATCATCTGAATTGGTAAAAGGC	Zhou et al. 2014
Ahsnp380	[A/G]	AGCTCATAGGCGGTCTCGC[A/G]CCAAACCCTATCAGGATCTACCACCAAGGCATCGGAGTCCGGGACGTCTCACTAGGCGACTGAGA	Zhou et al. 2014
Ahsnp404	[T/C]	AGCTCATCGCCTT[T/C]CCTATAGTTCCATTTGGTTGATGTTTTTTGAACACAAAGACACAAATATAAATACACAAATAGATATAGAC	Zhou et al. 2014
Ahsnp416	[G/A]	AGCTCATCTGTCGGTTATACAGCTAACCC[G/A]ACAAGTTTGATTTGCTAAACCATTGGACTGTCCTCTGACGTGCATCCCCATGAGT	Zhou et al. 2014
Ahsnp425	[C/T]	AGCTCATGCCTTGCATAGGATAGACATGTATCATATTGGTTATAACATTTCT[C/T]TGTGTTTGTGCACCATGCATTTTCTTTGTGCT	Zhou et al. 2014
Ahsnp456	[A/G]	AGCTCATTAGCCATAGG[A/G]CAGACATGCATCATATGTATTTGTATGACTTGTTTTGTATGTCTTTGGTTTGGATTGCCTAAATGCT	Zhou et al. 2014
Ahsnp466	[T/C]	AGCTCATTCGAACTAAAACACCAAACTCCTACCCCACCAAAT[T/C]CCAGAGAAAATTCTTTTCGTACGACTCCAATAAAGTGATCAA	Zhou et al. 2014
Ahsnp485	[C/T]	AGCTCATTTGTCGTTTTCGACGCGTACCGGACATAATCCAACT[C/T]GCAAGTCGGATAAGGCATTCTAGCAACATAACCTCTGCAAG	Zhou et al. 2014
Ahsnp501	[A/G]	AGCTCCAACTCTATTGGCGCCATTGTTGATGATCACAATTTACG[A/G]GCACCAAAAGCCTAGGGTGCAAGTTGAAGAACAAAACAAT	Zhou et al. 2014
Ahsnp522	[A/C]	AGCTCCAATTGACGAGCCGTTTGTGGCCACGCGAAGCTCT[A/C]ATCGAGTTCTACGTTTCTGTATAAAGAAATCTGGTAAGGTCTCT	Zhou et al. 2014
Ahsnp544	[T/C]	AGCTCCAGATGATG[T/C]GGCTTCCGATGGTTGGCTTGACTCTCCGGCAGATGCTCCTCTCTTCCTCTTCCTTACAACACCAGTGGCT	Zhou et al. 2014
Ahsnp612	[T/C]	AGCTCCCGTATCGTCCCAATCCTATACCTCCT[T/C]AGGTGCAGGGATCTCCTCTGGGTAGCAATCTTGAGCTCGATCTCCTTGTGAA	Zhou et al. 2014
Ahsnp613	[G/A]	AGCTCCCGTATCGTCCCAATCCTATACCTCCTTAGGTGCAGGGATCTCCTCTGG[G/A]TAGCAATCTTGAGCTCGATCTCCTTGTGAA	Zhou et al. 2014
Ahsnp621	[C/T]	AGCTCCCTCAAGTATTATGGGCTTACAAAACTACAC[C/T]TCACTCAACTATGAGCGAAACACCTTTCCGACTTGCATATGGAGTAGA	Zhou et al. 2014
Ahsnp629	[G/A]	AGCTCCCTTATTTTTCT[G/A]AGTTGCTGGCGCTAAAGGTCCAAGTTTGCATTTAGCGCCAGCTTGGCAGCTTCCAAATTCTTCTCTT	Zhou et al. 2014
Ahsnp659	[G/T]	AGCTCCGATTGCCGCACCGTTTGTAGCCAC[G/T]CAACCACATCACCAAGCTCTACAAAGCTCACAATTTTGTTTTTGAGGTAAACCA	Zhou et al. 2014
Ahsnp665	[C/T]	AGCTCCGCAGATATCCTATTCAAACCCACCTTCGACAAGCTTGGGCTACAAGAAATGAAGCTCAGAGCATATC[C/T]CAACAGCCTAT	Zhou et al. 2014
Ahsnp758	[G/T]	AGCTCCTGCAATGCGCACAGAGAGTTGGGATGGT[G/T]ATGAAGGTGCAGATGTCTATTCAGAAGATAAAGACTATGACCCAGAGGCG	Zhou et al. 2014
Ahsnp780	[C/T]	AGCTCCTTCTCCCTCTTCCTGATC[C/T]ATAACAACGACAGCGACGACGGCTCCCAGCACCGCTAGTCCCACCGATGCCGTCCCTTCC	Zhou et al. 2014
Ahsnp962	[G/A]	AGCTCGTCACAGTCATTCAATCATTGAAGGTTTAGACCTTCCGGATTCTCTTGAATGCC[G/A]CCATAATTCTAGCTTACGCCCCGAA	Zhou et al. 2014
Ahsnp1062	[T/C]	AGCTCTATTATGTTGCACCTGAAGAGATTTATAA[T/C]GAGAGAGACAGTGACACTAGTGTAACAGAGCGACAGTGATAGGCGTGGGA	Zhou et al. 2014
Ahsnp1135	[G/A]	AGCTCTGCGACGGCGCCACCGTCGTCGATGTCTACC[G/A]TCTCATTCAGTACGACATATAAGGCGCCCCCTTCGGATCTGGCCTCCC	Zhou et al. 2014
Ahsnp1189	[C/T]	AGCTCTTCATAATGCATCCTTCATAAGTGTTGAATTCTTCTTTATATAGCACTCCCATGCAGCATTT[C/T]AGCTTTCCAAAAATGAA	Zhou et al. 2014
Ahsnp1199	[G/T]	AGCTCTTCCTTTT[G/T]TGCTTGGGCATTGGCCCCTTTATTGTAGAATATAACCCTAGGTGACTCCTCAGCAATTTTTATGGGGATCA	Zhou et al. 2014
Ahsnp1209	[C/A]	AGCTCTTGAACAGGTCAGGACCTAGGATGTTGTATGTATATACATGTATATAGATATTATTTAG[C/A]TATATCTAGGGGGGTTCTAA	Zhou et al. 2014
Ahsnp1308	[C/T]	TAACACAATATTCTTCTCCCATTTGTTTTGTGACTGGTTATATTACTCAACACAAGATAAGCATGAATCGAGTCCGTAT[C/T]ACGAA	Zhou et al. 2014
Ahsnp1364	[C/A]	TAAAATACGAGCAAAAAATAATACCAATGACTTCAA[C/A]TTTCCAAAAATCGGTGTCCTTTTTTGCTGTTAGCATTGCCTCGATGTT	Zhou et al. 2014
Ahsnp1412	[T/G]	TAAAACGACTTGCCAATCCAACCCAAGCTTCTCA[T/G]CTTGGCTTGGTGTGCCACGCCTGACTCCCCAAGTGGCACGCCCTCTTCCT	Zhou et al. 2014
Ahsnp1417	[T/C]	TAAAAGGACAACTGCGCACTAATCTCTTGGTTGATGCACCAGCTATGTGGGCGATTC[T/C]ATCCAAACGATATAGTCGGTCCGCGTT	Zhou et al. 2014
Ahsnp1451	[G/A]	TAAATAAAATTTCTAAACTACCCTTATCTTCACCACTACCACT[G/A]TCATCTCTTCCCCTCCCCCTCTCCTCTCTCTCTCTCTCT	Zhou et al. 2014
Ahsnp1482	[G/T]	TAACGATTCCTCTCTAATCCGGGCTCTTTCTCAGACTTTCAGAAGTAGGTCGAGTTCTTCCCGTTGATTTTGAGAGTTT[G/T]CCTTT	Zhou et al. 2014
Ahsnp1507	[G/A]	TAACTTTATTATTCAC[G/A]TTGTTCAACAATTTTATTGATTACCTATACTTTTTCATATAAATAAACCGAAGGCATGAGCTTTGCAA	Zhou et al. 2014
Ahsnp1585	[C/T]	TAATGGTTTTGAAATCACCAAAAGCAGATACATCGAACTCGAGAGCCAAGAGCTTCACCTGGGCCTTGATCG[C/T]TTCGTCAGTA	Zhou et al. 2014
Ahsnp1596	[G/A]	TAATTCTTATTTGGGGTTTGTTATTTGTGACAACCAAAATTTTTGCATGTGCG[G/A]ATTCTTTGTTGGTGTAGAACTATACTTGCAA	Zhou et al. 2014
Ahsnp1668	[T/C]	AGCTCAGC[T/C]GCGAGTGAGGGGATGCGCGCTTGACCCGTCGCCGCCGTTCCGCCCAACCCGACCTGTCGTCGCCGTTCCGCCCAAA	Zhou et al. 2014
Ahsnp1708	[G/A]	AGCTCCTGTACCTGCAGCATCAAATCCACGCTTTCCTTGGGCTCGACTGGTGGTGGAGCCT[G/A]ACGACGGCCTCAACATGGAGGAA	Zhou et al. 2014
Ahsnp1713	[C/T]	AGCTCGAAGGGAGGTAAAGGCTGGAGCTTCGGGGGTCTCTAAAACAGCAAAGGGAGGCAACAGCTCTGTGGTTGCCGG[C/T]GGCGGC	Zhou et al. 2014
Ahsnp1742	[G/T]	AGCTCTAACGTGGAGAGTAGGGGTACTTGAGGCGTTAGTGACAAAGGTAA[G/T]TGTAACTAACGCTCTCGAAGATGAGGCATACCAA	Zhou et al. 2014
Ahsnp1743	[C/A]	AGCTCTAACGTGGAGAGTAGGGGTACTTGAGGCGTTAGTGACAAAGGTAATTGT[C/A]ACTAACGCTCTCGAAGATGAGGCATACCAA	Zhou et al. 2014
Ahsnp1745	[G/T]	AGCTCTACAAAATTTATACAATCAATCTTGAGGGAAGCTACGATTTGCTCTTCGAATTTCCA[G/T]CTTTGATTTCGAGTTTCATGAC	Zhou et al. 2014
Ahsnp1767	[G/T]	AGCTCTGGGCAATAATTAGAGGCTTGCAAATTGCATCAGCAAAGAAGTATAACCATTTCATTGTA[G/T]AATCTGACTCAGCCATTGT	Zhou et al. 2014
Ahsnp1773	[C/T]	AGCTCTTCTTTACCATTACTACATTGGCTAACCATGAGGAGAATCGAAGTTCT[C/T]GGATGAACCCTACATCAAGTAACTTCCGCGT	Zhou et al. 2014
Ahsnp1912	[C/A]	TAACTACGAAAAAT[C/A]AAAACCATACTTTGGCCGACTCCACCCTAAGTGTGGAATACTTCAAAAACCTCTTCTTTCACAAGTTTCA	Zhou et al. 2014
Ahsnp1944	[C/A]	TAAGGGACCCAAGAGATATC[C/A]ATTCAATCTAAGGTAGAACGGAGGTGGTTGTCAGGCACACGTTCATAGGTGAGAATGATGNNNN	Zhou et al. 2014
Ahsnp2005	[G/A]	TAATGCCATAGCCCTTTGACTACTAGAAGGT[G/A]TAGAAAAGCTTCGGGAGACAATTATAGGGGGGGTTGGAAGTGGAGAAGCTGCC	Zhou et al. 2014
Ahsnp12	[A/G]	TAATCAAAATCAGAGTAAACCTGCAGATTCATAAAGCAAAAAGCAG[A/G]GTATGATAAACCTAAAACTGGCACAGAAAAAATAAACC	Zhou et al. 2014
Ahsnp24	[G/A]	AGCTCCTCGGACAGTAGG[G/A]AAAGTGGAGCAGGATAAAGAAAGGACTGCATGCCATCAAAGACCACTCTAACGAGCAGCAAGGAAA	Zhou et al. 2014
Ahsnp25	[A/G]	AGCTCAANAA[A/G]GTTCCGGAAGAAGGTAATGAGACTTTATACACCCAACATAGAGAAGATGACGTACATGCTACAAAAAGGGGTTT	Zhou et al. 2014
Ahsnp110	[A/G]	AGCTCTTC[A/G]ACCTCGGCCCTAGCAGCTTTAGCCGATGCAACGGCCTGATCGCGCTCCTTCTCCAGGACCGCCACCCGACCCTGAG	Zhou et al. 2014
Ahsnp121	[A/G]	AGCTCTATAACTGAAGTTATTCTCGTTGGAGTGCAAGGAGGTCATGGTTGACA[A/G]CATCATTCACTTTCTTCTCTCCTTCTACAAA	Zhou et al. 2014
Ahsnp136	[A/C]	AGCTCGAGAGCATTGCCAAG[A/C]AGAGGATAAACTGGCGTGTTCATCAACAACACCAACAACAATGCCAATGCAAAGAACTTGAGTC	Zhou et al. 2014
Ahsnp198	[A/G]	AGCTCAACCCTTCTCACCGTCGTGTGGTCAGTGTCGTTCGTCTTGGCAACACACTCTACTCAGAGACTCAGACTTCGAT[A/G]GTCAG	Zhou et al. 2014
Ahsnp213	[C/A]	AGCTCAAGAAGCCTAATTGGCGCGTTCTCAACTGCGTTGGAAAGTAGACATCCTGGGCTTTCCAGCAATGTATAATAGTC[C/A]ATAC	Zhou et al. 2014
Ahsnp222	[A/T]	AGCTCAAGCTTATCTTCTTGCTTTGTGCTTGTATGGGTCAAGATGCATTGGTCTCAGAGTCT[A/T]TGCATTGGTTTGGGTTTTCTTG	Zhou et al. 2014
Ahsnp270	[G/A]	AGCTCACA[G/A]TAAGAGTGTTAGATAGAGTTATCTAAAATCAGAGGAGCAGAAACTACCAGCAGCGATGGTAAGACATGACGATGGA	Zhou et al. 2014
Ahsnp272	[C/T]	AGCTCACATAAATGATATAAACATATGATGGCACAGAAGTCATGATT[C/T]CCATCGACATAAATAAAGAAAAACAAAGGGCAACATT	Zhou et al. 2014
Ahsnp393	[C/A]	AGCTCATCAGGAGGCACAGAAAGTAGAGGAAGCTCGATCTTTCCTTCCATA[C/A]AAACATAATGAAAACTTTGGTTGGGGCGACTAT	Zhou et al. 2014
Ahsnp430	[T/C]	AGCTCATGGAAATGTAGAAAGAATGGAGCAACGGTTGAAGGAAGCTGGACTC[T/C]GGGATCAGGTAGATTCCTCTTGGCCTCTGAAA	Zhou et al. 2014
Ahsnp443	[G/A]	AGCTCATGTGTCAGTTGCCTACCCGCTCTCGACATTACAC[G/A]GGAGCGAGTGACAGGTATGGCTTTCCAGATGCCTACAGTGTGCT	Zhou et al. 2014
Ahsnp502	[C/T]	AGCTCCAACTGAGAATGATGGAC[C/T]AGCAGAGAAATTTTCAAGCAAGATTTTTGGAATCACAAAGGGAGCAATCTGCCCAGTTTTA	Zhou et al. 2014
Ahsnp503	[A/G]	AGCTCCAACTGAGGATGACAGATCT[A/G]CAAAGAGATTTCCAAGTAAGATTTTTGGATTCACAAAGAGAGCAATCTGCCCAGTTCCA	Zhou et al. 2014
Ahsnp513	[A/G]	AGCTCCAAGTCCTTTGGCGCCATTGTTGATGATCATAATTTCGTGCACCAGTGAGTCGTTGCACATCTTTGACGCTTCCA[A/G]GGCT	Zhou et al. 2014
Ahsnp554	[C/T]	AGCTCCAG[C/T]AGTGAGGCGTGGCGGCAACGGCTCCTCCTCTCTTCTTCCATCTCCTACCCCATTTTCCTCTCTTTTCTTTCTTCAT	Zhou et al. 2014
Ahsnp572	[C/T]	AGCTCCATTTGATATGAAATGAAGTCCCCTTGATATAGCAC[C/T]CAATAATCTTCAGAAACACCAAAAATTGGCTAAAGAGGCCCCA	Zhou et al. 2014
Ahsnp578	[T/C]	AGCTCCCAAGATAAAAACAATGGCTAGTGATTGACCTCCGAGTGTCTGCGCATGTAGCCCAATCTACATCTGAGAATC[T/C]AGTAAG	Zhou et al. 2014
Ahsnp684	[C/T]	AGCTCCGTATGAAACAATTATGATAATTCCAACTACAGAAAATTCAGTG[C/T]GCGTACACACATTAGAAATTATATAATTTACCTTA	Zhou et al. 2014
Ahsnp685	[C/T]	AGCTCCGTCAGATCCACTA[C/T]CGTTCTTCAGACTGAGCTTCTTCATCGTGGAATCACTGACTACCGCCTTCGTTCGCCGCGAAGGT	Zhou et al. 2014
Ahsnp686	[C/T]	AGCTCCGTTCCGCGCTATATGCTACCACGTGTCAGAATCCATCTGCGACACCTATGGTCCATATCA[C/T]ATGACGATAACTACCATC	Zhou et al. 2014
Ahsnp751	[T/C]	AGCTCCTCTTTTTGGTGGGTAACTTCTTTGTCCCTGATGGTGCTGGTGCAGCAGCTCCTACTATGTCCTACAATAGAAAAA[T/C]ATT	Zhou et al. 2014
Ahsnp785	[T/G]	AGCTCCTTGCTCATGCAAAGTGATCCGGCGTGTGATGACAAGTCATCTTAGCCTAGTTTTACTAGTCTT[T/G]TTCTTTGTTTATATT	Zhou et al. 2014
Ahsnp788	[G/A]	AGCTCCTTGTTAGGGCGGCTTGTGCTTGTATTGATCCT[G/A]GAATCCCCACTAATGTTTGTACGTCCAATATCCTCCAGGATCCCAA	Zhou et al. 2014
Ahsnp796	[G/C]	AGCTCGAACACAAAGCTTTCTGGGCCACTAAGCACCTTG[G/C]TGCGGTATTTCACAACCCACACTACTTACCGGCAAGTGCACCGGG	Zhou et al. 2014
Ahsnp844	[C/A]	AGCTCGATGATGATGAGAGAAAGGAGAAGCTCAAGGTTGAG[C/A]TGACTGTTGGGAGCTGCGCGTTTTATCGTTGTGGAGTTAGGGT	Zhou et al. 2014
Ahsnp858	[C/T]	AGCTCGCACAGCTTGTGTGAGTGAACAGACTTAGTACCTGTACGTACGCACACTTTCAAAATCTTC[C/T]TGGGTGTGCGCACTGATA	Zhou et al. 2014
Ahsnp869	[C/T]	AGCTCGCCGCTGCGGGTGCCGCTGCTGGGCAAGGGAGCTGCGTCTCTGTGGCACTAACCGCCGGGAGCGGGTCTGTGACTT[C/T]CGG	Zhou et al. 2014
Ahsnp872	[C/T]	AGCTCGCCTCCTCCATCGTCGCCCTTACTCGCCGCGGTAATACTCTGCCTTCCAACCCTAACTTTCT[C/T]AGTCTCTCTTCAACCTT	Zhou et al. 2014
Ahsnp881	[G/C]	AGCTCGCGTCGTCTGTGCTGTCACCCCCTACCCGTGTCGC[G/C]ATCTGATACACCACTATTTTATCATATATTTTGGATTGAATTGA	Zhou et al. 2014
Ahsnp977	[A/G]	AGCTCGTGCGGTGGGACAGCGACTGCACGAGGGAGGAACGAC[A/G]CAAGATGAATTGCACTGCTCACGACGGCTTTGAGCAGTGGCG	Zhou et al. 2014
Ahsnp987	[C/T]	AGCTCGTTCCTTTTATAAGTCGGGCTCAAGCATTCTGTGCCTTCCACTGTAGACGTCGGGCTTTCACCTCGTCGGTACTA[C/T]CCGA	Zhou et al. 2014
Ahsnp993	[T/A]	AGCTCTAAAATGCTTTCTAGTTGTCCCGTCTTTTCGCCGATGTGATTTTATTATTTTTGTGGACTTTGCAGGAAC[T/A]TTACAGTGG	Zhou et al. 2014
Ahsnp1042	[A/T]	AGCTCTAGCATGGATCAGTTGAGGATGGGACATCAAGAGCATTCCACAATCCTCCATGAAATAAAAAA[A/T]GATCAAAGAGCAATGC	Zhou et al. 2014
Ahsnp1060	[G/T]	AGCTCTATGAAACTCATGGAACAATTTGCTAGGTAACTCACTATTTTCTTCTCA[G/T]CCAGCTTCCCCCAATTTCAAAAATTCAAGA	Zhou et al. 2014
Ahsnp1077	[G/A]	AGCTCTCCATGCTCATTCTTCATTGTAGTGACTCCAGACTTCTTAGGCACCACTTGCACTGGGCTCT[G/A]ACAAACCCCAATTTGAC	Zhou et al. 2014
Ahsnp1082	[T/C]	AGCTCTCCCTGGGTGTTTGAACTCCAGTCTGGTTCCAGCTCTGGCACCTAATAC[T/C]TTTTTGCAACCATATGAGCCAGCGAATTAC	Zhou et al. 2014
Ahsnp1086	[T/A]	AGCTCTCCTGGACCGAGGAAGATGATCCCTACTCTTCAGGTTTGTTTGGC[T/A]GATCCTTCATAGGCTTCTGCTGCTACCTCTTCTT	Zhou et al. 2014
Ahsnp1097	[G/A]	AGCTCTCTCAACAGTA[G/A]GCATATCCCTGGGTGTGCGTGCGCACCAGAATATGCATACGCACATTTTTGAAAATCACAGGGTGTAC	Zhou et al. 2014
Ahsnp1110	[G/T]	AGCTCTCTGTGTTTCAGGCCTGCATACATTCAAGGTGTACGTTCTCCTCCTGCGTGGCTTCTCCTCAAGAA[G/T]GGTGCAGGGGGTC	Zhou et al. 2014
Ahsnp1192	[C/A]	AGCTCTTCATTCTCGTCTTCAGGCTGGGCTCCCTCGACACGAATGGTCTCGGAAATGTGAGAGGGGTTGGAATCACTA[C/A]AACAAA	Zhou et al. 2014
Ahsnp1200	[A/G]	AGCTCTTCGTATGGAGGAGGAAGTTGTCATATGCAAAGACACTCC[A/G]ACGCTCTAGTCAGCAAAGTGTGCAGACGAAAAAAGGGGT	Zhou et al. 2014
Ahsnp1240	[G/T]	AGCTCTTTAGGAAGAGGTTGGTGATGACAGACTCAGCAAGAAGTCGGTCGCTTTGTCTTC[G/T]TCCACCCCGGACCATATAGCTCGG	Zhou et al. 2014
Ahsnp1275	[C/T]	AGCTCTTTTT[C/T]ATTCTGTTTTTCATTCTATGTTTGATTTTTAAGTTATTTTTGTGACTTCACATGATCATCAACCTAAAGAAAAC	Zhou et al. 2014
Ahsnp1286	[T/C]	TAACCGTGAAGTTACATAGTCC[T/C]TGATGGTCATCGCATTTCTACTTTCAATGGAGACGATGGGTATGAGCGGTATTATGCAAACT	Zhou et al. 2014
Ahsnp1313	[A/G]	TAACAGAGATCACAATTTCGTGCACCAGTTGACCCCCAGCGTTCTTCCAAGACAGTCACAAAAGCTC[A/G]CTCAGCCTCATCCAACA	Zhou et al. 2014
Ahsnp1317	[C/A]	AGCTCTCAACAT[C/A]CAGGGCTTTCCAGCAATATATAATAGTCCATACTTTGCGCTAAGATAGACGACGTAACTTGGCGTTGAACGC	Zhou et al. 2014
Ahsnp1335	[G/A]	TAAG[G/A]CCTATCCCCACAGACGGCGCCAATGTTCGTTAGGACGGCTCCTGGACGGATCGGGTGACTCGTTGAAGGAGAAGACGCTT	Zhou et al. 2014
Ahsnp1338	[G/T]	TAAACGACGGGAATTCTGAAGCTGATTTGCAACGCAGATTTAGGCAATCAAATCTCGGGCAAAGTAT[G/T]GACTATTATACATTGCT	Zhou et al. 2014
Ahsnp1366	[C/A]	AGCTCGTGCCT[C/A]GAGTAGGTCGGGATAAATCTGTATGCTTGTCTGGGCCCACATGATTCGGATTCTTTTGTTCTAAAGAGATTAG	Zhou et al. 2014
Ahsnp1407	[A/G]	TAA[A/G]AATGGGCAACTGCTGCCGATCTCCAGCTGCCGTTGCTCGCGAGGACGTGAAATCATCATTCTCCGACCACACCAAAGGA	Zhou et al. 2014
Ahsnp1409	[T/C]	TAAAACATGTTTGGTTTGTGAGAAAAATGATAATCGAATTTGGTGGGAGATTCTAATTATAGGAGACACCTTGTCGAGTTT[T/C]G	Zhou et al. 2014
Ahsnp1415	[G/A]	TAAAAGACTGTCTGCCACAAGATATGAGAATGATTGAAAGGTCATGAGAGGGTAGC[G/A]GAAAGTAAATAGTTATGGTACTGCTA	Zhou et al. 2014
Ahsnp1425	[C/T]	TAAAA[C/T]GGAGATTACAGGATGCAAAGGGAGCCTGGGCAGAGGAGCTTCCCAGGTTCTATGGGCATACCGAACGACGCTACATTCT	Zhou et al. 2014
Ahsnp1574	[T/C]	TAATGACCAATAGAGGTTCATCCTCCCAGGTCTCATTACCAAATAATTTGGCATTCAG[T/C]TTCATGATTACTTCTAGATATTGA	Zhou et al. 2014
Ahsnp1749	[G/T]	AGCTCTCATGACGTCAGCAATGTTGATGGTGAGAGTAGTAAGCTCTTCAATTCT[G/T]CCATTGGAGTGAACTATACGTATCACGTCA	Zhou et al. 2014
Ahsnp1758	[C/T]	AGCTCTCTGCCAAATTTAGCTTCTCCTCAACCCTCTTCTTAG[C/T]AGTAGCAGCCTCACCACGAGAGGTGTTTAGATCCTTCATCAC	Zhou et al. 2014
Ahsnp1769	[G/A]	AGCTCTTCATAGTGATCGTGTG[G/A]CCGTAAACGGTGCGGCGATCGAAGCTCTATAGCTCAAGTTATGAGCTTGGAAAGTTTGAGGC	Zhou et al. 2014
Ahsnp1781	[T/C]	AGGTCTCTCTGGATCTGCCGCACGGTGCCTTCTCGC[T/C]GCGCCTCCTCCTCTCGGCGTCCCTGTCGTGCCTCGTCCCTTGTATTCT	Zhou et al. 2014
Ahsnp1881	[C/T]	TAAATCCGCCTTCGACAAACTCGGCCTAAAGAGCATATCTGAACAGCTTGTTTGGATTAGGAGACACTCCAATCCGA[C/T]CGCTCCG	Zhou et al. 2014
Ahsnp1882	[C/A]	TAAATGAGCCCAAAATCCCTTCTCTTCCTCATTTCGTTTGAAGGCAGCGTAAAAGCATC[C/A]AGGGAAGAGAAGAAACACTGAAATC	Zhou et al. 2014
Ahsnp1900	[T/G]	TAACCCACTAATTGCTTCTTCTCCAACCGCTAAGTATACCTTCAATGGTGCACCAGGCT[T/G]AGGGGAAGCCATGGTGTGAGGGG	Zhou et al. 2014
Ahsnp1982	[G/A]	TAATCACCATGTACCCCGC[G/A]CATGCGGCTCACCTTCCGAATTACGCTCAGTGTTCCACAATTTTCCCAATAAGAAAGACATATAC	Zhou et al. 2014
Ahsnp1999	[G/A]	TAATGAAGCACGTGGCTCACAATTTTTGGGGCCTCTTTAGCCAATTTTTGGTGTTTCTGAAGATTATTG[G/A]GTGCTATATCAAG	Zhou et al. 2014
Ahsnp3	[G/A]	AGCTCAATAGA[G/A]AAAAGATTTGTGTGAATTCAAGTTGTGTATAATGATACAATATAGAAGGGTATTTATAAGTGTTATGAGAATC	Zhou et al. 2014
Ahsnp59	[A/C]	AGCTCTA[A/C]AAGAGCATGAGGAAATCCCTCATCAAGAAATCTCTGAGATGCCTCAAGGGATGCATTTTCCTCCACAAAATTATTGG	Zhou et al. 2014
Ahsnp125	[T/C]	AGCTCTTTCCACTTGATCAAGTATTGGATACTTGGTGGTACTCCTCATTGTCGCACGACGCGATTAGCTAAGATCTATT[T/C]GATTT	Zhou et al. 2014
Ahsnp167	[A/G]	AGCTCAAACTCAATTTATTTCACTCACTGGATAGATCATGTTGGACGTGGAAAGTCTCATGTG[A/G]TATGTGACTTTGTTTTTTCCT	Zhou et al. 2014
Ahsnp180	[A/T]	AGCTCAAATGCTCCATTGGATTCTCCATAGGGAGTAGCAGCCGCCATCACTGAGGTTGTTGAGTCCCATTACATTTTTAT[A/T]TGTT	Zhou et al. 2014
Ahsnp182	[C/A]	AGCTCAAATTCAATGAAGTCCCAATACACAAACAGTCTCCTCACTAGGATGTTGGATG[C/A]TAGAACTTATCAACAGAATGAAAGTG	Zhou et al. 2014
Ahsnp191	[G/T]	AGCTCAACACTCAAAGTGGAGCATACATAGAAGAGATAAAAATCA[G/T]CAACTGCCCAGCTCTTATGTCATCTCCGGCATAGCCATC	Zhou et al. 2014
Ahsnp194	[T/C]	AGCTCAACATGACCCCTCATCCCCGCTATTTTACACATCTCAATGGCATCTCTGTCTCCCTCAAA[T/C]TACTTCAGATCCTTCTCTA	Zhou et al. 2014
Ahsnp228	[G/A]	AGCTCAAGTAAAAGCCAAATGAGTG[G/A]AAAGAGACTGAGTGATACACTTGAGAGAAAAGCCTAGAGCTATTTTCATATTTCTTTAG	Zhou et al. 2014
Ahsnp271	[T/C]	AGCTCACATAAATGATATAAACATATGATGGCACAGAAG[T/C]CATGATTCCCATCGACATAAATAAAGAAAAACAAAGGGCAACATT	Zhou et al. 2014
Ahsnp350	[A/G]	AGCTCAGCCGATCTCCCCAGAGGCCCAAGGAAGCCCAAAGTGAAGAACCACTGCCCACTAGAAAGGC[A/G]GCTGGCCAAGGATATGA	Zhou et al. 2014
Ahsnp365	[G/A]	AGCTCAGTACCGCGACGGATTAGTCCTTGACCTGTCGGATCGAG[G/A]AATACCGTGGGAAACCAAAAAAAAAAATTACCAATTTATC	Zhou et al. 2014
Ahsnp424	[C/T]	AGCTCATGCCCTGCTTAGAACAACTATGCATCATATTATTTGCGGCATTTTCTCTGTATTTGTACTTTGTACATGTT[C/T]TCTATGA	Zhou et al. 2014
Ahsnp464	[G/A]	AGCTCATTCATGAGAAGACAGGAAGAAAGTTCACTCTAAGGGGC[G/A]AAAATCTGAGCCCATACCTCACCTCCGTAAGGATCTAACT	Zhou et al. 2014
Ahsnp528	[G/T]	AGCTCCACATAGAAAATGGGCATCCACATCCCATTCTTATCACAACAATAACTACTTTATAATATTGCATTTTTTTTT[G/T]ACTTTT	Zhou et al. 2014
Ahsnp549	[G/A]	AGCTCCAGGTCCCCGACAACGGCACCAATGTTTC[G/A]AGGGTTACTTGAAATTGGGTTGTATTTGGGCCTGAACGTGAGGTCAAGAT	Zhou et al. 2014
Ahsnp571	[C/T]	AGCTCCATTGTCACCATGTCGTACATTTTTTTCAAATCAATAAACACCGTATGTCTATCCATTTTATTACTA[C/T]GGTACCTCTCTA	Zhou et al. 2014
Ahsnp586	[C/T]	AGCTCCCAGAATGCCTCA[C/T]CAAGGTGCCGCTTGACCTACATCTGAAAATTACAAAATATGTATGGAGGGAGAACCATAGGTTCTA	Zhou et al. 2014
Ahsnp626	[G/A]	AGCTCCCTGATGAATGGTCTACAACCTTCTTTGACTCATAAGAAACACCTTCATAGAAAGT[G/A]TGAAGTTGAACCCATTCATTGAA	Zhou et al. 2014
Ahsnp664	[C/T]	AGCTCCGATTGT[C/T]GCACCGCTTGCGGCTACGCGTTCACTGGGAAGTGCTCTACAAAACCCACTACTTTATTCTTGAGGTAAGCCA	Zhou et al. 2014
Ahsnp681	[T/C]	AGCTCCGGTTCATTGTAATTCGAATCAACTACATTCGCACTATATATATATATAATTCGAATCAATTGAATT[T/C]GAATTACAATTC	Zhou et al. 2014
Ahsnp709	[C/T]	AGCTCCTCACCCAACCATGGGGTTTAGAGACTCATGCCAT[C/T]AGAAATACAATGTGAAGTGTAAAAATGTCATCAAATACATAGTA	Zhou et al. 2014
Ahsnp710	[G/A]	AGCTCCTCACCCCAACCTATGGGGTTTAGAGACTCATGCT[G/A]TAAAAAATACAATATGAGATGTAAAAAATGTAATCCGTTCTGAA	Zhou et al. 2014
Ahsnp814	[T/C]	AGCTCGACCCCAACATTCTTGAAAGATATTCACGATCAAC[T/C]GTTCCTCCTCATCAAGATCCTCGAAATCGTACCTCATGACCATC	Zhou et al. 2014
Ahsnp815	[A/G]	AGCTCGACCGTAGCTTCTGGAAAGGTGTG[A/G]ATAGGAGGAACAAAAAGTTTACGACACCTATAGGTAATTGTAGAATATATACCAT	Zhou et al. 2014
Ahsnp823	[C/G]	AGCTCGACGGCGGCGCACGACAATGGCGCTATGATGACCGC[C/G]GCGAGCTAGATGCGGGTTGGAAGACGACAAGTCTTTGAGATCT	Zhou et al. 2014
Ahsnp847	[A/T]	AGCTCGA[A/T]GTTGGGACCTCACCAATGCAATAAAGAAGATGCGCTCTCTCCAAGCATTGAGCGCTATCAAGACTTGGCAAGTCCAA	Zhou et al. 2014
Ahsnp901	[C/T]	AGCTCGGATGAGGGGGACTCAACGCCAAAAGGCCGAAAACCAACACTCGGAGAAAACC[C/T]GGATCGCACATCCGGTCCGAACTCAA	Zhou et al. 2014
Ahsnp903	[C/A]	AGCTCGGATTAGAGAGGAAGCGCTAAAG[C/A]ATCGAATGGCTTCCAGGTACAATCGGAAGGAAATCCAGTGAAGCTTTACTACCAAT	Zhou et al. 2014
Ahsnp965	[G/A]	AGCTCGTCATCGGAAAGAGGTAACGATGGTGTGTACTGCCGCTGCTACTATCGTTACTGGGGAAGGTCACCGTTGAGCA[G/A]CGTGC	Zhou et al. 2014
Ahsnp1029	[C/T]	AGCTCTACAAAGTCCAAGGCATGATTTGGTAAGGAACCTTCATTCTCGTTCTCAGCCTCACTTTTT[C/T]CCAAATTTTCGAAATTAG	Zhou et al. 2014
Ahsnp1033	[G/A]	AGCTCTACACAAAAAGAGAAGGTTAGAACACTAAGTGTTGC[G/A]TAGTTATCTCTCATTATTTGAGGGAGAATTGGGATGAGGAATC	Zhou et al. 2014
Ahsnp1072	[G/A]	AGCTCTCATCAAACTATGTAAT[G/A]TGAGTCTTGAGAGAAGCAAAAAGAATGAGAGGAGAAATGGAAATAATGGAAAAAAAATGAGA	Zhou et al. 2014
Ahsnp1075	[C/A]	AGCTCTCATGGAG[C/A]CTCACAGATGTTTCAGAACATTGTTGGGACCTCCCAACACCAAACTTAGAGTTTGAATGTGGCGGTTCAAC	Zhou et al. 2014
Ahsnp1089	[A/G]	AGCTCTCGACAATTGGGGAGACTTCGGGGAGAAATCAAGC[A/G]AGAGAATCCATGCTTTCTTTGATGTGGGACTAACTTCAACACTC	Zhou et al. 2014
Ahsnp1234	[T/A]	AGCTCTTGTGGCTTTATGAATAAGAGGGAGA[T/A]GGTTAGTGGTAGGAGTTGGCATGCCAGGTTCAATATGGTTCCACACGCCAAAT	Zhou et al. 2014
Ahsnp1265	[A/T]	AGCTCTTTTCCCTTGAAGTCGGACACTTTATAGTAATATTTTCCTAAGACTTTGACGACCTTGTAAGG[A/T]TCTTTCCAGTTTGCAG	Zhou et al. 2014
Ahsnp1311	[T/C]	TAAAACACAAAACATTCAAATAATCAGTAATCAAATAATCATTGAACAATG[T/C]ATAAAAAACGCAAAAAAAGTGAGCAGTGAACTG	Zhou et al. 2014
Ahsnp1334	[A/T]	TAACATTCTCCGGTGAAATTCCTACTTCTCTCTAACCACACCTAACTTCACCATCACCTA[A/T]TCGAATGCCAATCAAAAGCAATAC	Zhou et al. 2014
Ahsnp1431	[T/C]	TAAACATATCAACCTAGCTTAGATCTCACAAATCCAGCAACTCTTCTATCCGCCTAACTAAGATCTGCAAGATAACCA[T/C]AGCT	Zhou et al. 2014
Ahsnp1487	[C/T]	TAACGTCATTAGCTTGACAGTTAGATCCTTACGGAGGTGAGGTATGGGCTCAGATTTT[C/T]GCCCCTTAGAGTGAACTTTCTTCCTG	Zhou et al. 2014
Ahsnp1492	[G/A]	TAACTCCTTAGGAGGTGCAGTCCTAAACTATC[G/A]ATTGACAAAATAGTTGCATTGGCTGTAACATTTTTACAAAAAATAAAGAAAA	Zhou et al. 2014
Ahsnp1591	[G/T]	TAATGTTTTCTTCT[G/T]CTATTTCTCCTTCCTTTCTTCTTGTTCTACAAAGTCTTTTTGGACCTCATCATATCTAGGGATGGCATAG	Zhou et al. 2014
Ahsnp1613	[C/A]	AGCTCAGAACCTAG[C/A]TCTATTGGCAAAACAATGTTGGAGAATAGTCAAACAACCTCAATCTTTACTATCCAGAAGCTCAGAGGAA	Zhou et al. 2014
Ahsnp1614	[C/G]	AGCTCACTCATT[C/G]TCTCTCCCTTCATAACTTCTCTCTCTATCTCTCCCCCTTTCTATGCTGATGGCAATGACAACACTCAACTCG	Zhou et al. 2014
Ahsnp1651	[C/T]	AGCTCAACCTTCT[C/T]AGTCTTACAGAGCCAACGTCATCGACACTGCACTGTCGCCGTCTCGTCATCGGGTCTTGTACGTCCGCCAC	Zhou et al. 2014
Ahsnp1664	[C/T]	AGCTCACTGTCGTCGAGAAGGGAGTGAAGCCATCGCCACCATTGT[C/T]GTACTCTACTACTGCCGCGTCTCACCAAGCCACGGCTAA	Zhou et al. 2014
Ahsnp1696	[T/C]	AGCTCCCTT[T/C]GCAAGATCTTTGTTCCTTTTCTTCAAGGCAGCCATCTCCCGAGAGACCGCCTCCGCCGAAGTCTCAGACCACTTG	Zhou et al. 2014
Ahsnp1878	[C/T]	TAAATATTAGCACCAAGTGGACAATTGAATTGGTTGGTGACAATGAA[C/T]GGAAGAGGTTTGAGATGAGCCGCAAAGCAATTGAATT	Zhou et al. 2014
Ahsnp1884	[G/A]	TAAATGCCCAAATTGGCACCAAAACTGGCGTCTAGACTCCAAGAACATCCT[G/A]TGCACGTGAAGCTCAGCCCAAACACACACCAAG	Zhou et al. 2014
Ahsnp1916	[C/T]	TAACTCCACTTTGAGGCACATGTACG[C/T]GAAAGCTTGGAAGCTCAGCCCAAACACTCACCAAGTGGGCCCCAGAAGTGGATTTCTG	Zhou et al. 2014
Ahsnp1939	[G/C]	TAAGGAAATAAAGAAA[G/C]CATGCTCAAGGGAAGAGAAGCGTGACCCAAGGGAAGAAAAGCGTGGCTGAATTCAAGGAACAAGAGCC	Zhou et al. 2014
Ahsnp1943	[C/T]	TAAGGATGGTACGGGGGTAGCAAAGTCAAGCACTCGGATCATTCTTCT[C/T]AGCTGCATCTTGGATTCCCTCAGCTATAATTTCA	Zhou et al. 2014
Ahsnp1957	[G/A]	TAAGTGGGTCATGTGCGAGCACCGACGCGTACGCATGGGTCACACGTACGCGTC[G/A]CTTTACATTTTTCCATCCACGCGTACGCAA	Zhou et al. 2014
Ahsnp140	[A/G]	AGCTCCTTCAC[A/G]AGATATGGCTCCAACAATATGTCCATGAAGGAGATATCAATAGACTGAATAACACTTGGCACGTAGCTGGAGC	Zhou et al. 2014
Ahsnp223	[C/T]	AGCTCAAGCTTGGGGATTTCTCCCTCCTTCTTAGG[C/T]GTGCTCACCATGTCTTTCTAGGGTGGTGAATCATCAATCTCAAGTAATT	Zhou et al. 2014
Ahsnp247	[T/A]	AGCTCAATGCTTTGGTTTAGTTGAAGCTACCTCAGAAGCTTCGAGATCCTGGACGCTTCCTAATTCC[T/A]TGTACCATAGGAACCAT	Zhou et al. 2014
Ahsnp258	[C/T]	AGCTCAATTCGAATTCTATTTATAGAAAAATTGTTAGCAAATCAAATGAGTCTCGTT[C/T]GAATTAACATGGGCGCACATTGGATGT	Zhou et al. 2014
Ahsnp264	[C/T]	AGCTCACAATTATGCGTACACATGCATCACTATGTGTTTGCACGGATGCTAAAACTTCCAAACTCCATTTCTT[C/T]ATGGCTTATTC	Zhou et al. 2014
Ahsnp275	[C/A]	AGCTCACATATAAGCCTATACTAAATAGGAGACCCCCTTCT[C/A]AACTTCAACAAAGAGGAACATCTACAACATTATGTACATCACA	Zhou et al. 2014
Ahsnp304	[T/C]	AGCTCACGTGTCAGTTACTTTACCAGAATC[T/C]GACACATCCGGTAGCTAACTTGAACATTGTCCTCTCTGCTATTTACTCACTATA	Zhou et al. 2014
Ahsnp305	[C/T]	AGCTCACGTGTCAGTTACTTTACCAGAATCTGACACATC[C/T]GGTAGCTAACTTGAACATTGTCCTCTCTGCTATTTACTCACTATA	Zhou et al. 2014
Ahsnp315	[G/A]	AGCTCACTCCAAAACAAAGGGATGTTGCGTTCCTTTACTTCACTGAGCGCTATACTT[G/A]CAAAGAAATAGCGGTGTGCAAAAAAAC	Zhou et al. 2014
Ahsnp322	[G/A]	AGCTCACTTCCCTTCCTCTCTCGCCGCCGGTAAGCACTGTTGCTTCAATTTACGTTGTTGATTTTTGAAATAATG[G/A]TTGATGGTT	Zhou et al. 2014
Ahsnp390	[G/A]	AGCTCATCAGAAAGGCACGCTTCTATCTATTGAAACAGCTCAAAGTAG[G/A]AAAAACTTACATTGGAGCCCGCCCAAAAAGGGTGGG	Zhou et al. 2014
Ahsnp400	[C/A]	AGCTCATCCTCTGCGCGCTACGCCGGTGACCCGATCTG[C/A]AGCCCAGCCTCGCCCTCTTCCGTTGCACATCTTGGAGCGCGGAATC	Zhou et al. 2014
Ahsnp411	[G/T]	AGCTCATCTATGAGAAGATAGGAAGAAAGTTCACTATAAGA[G/T]ACGAAATTCTGAGCCTATATCACTCTCTATAAGGAGATAACCG	Zhou et al. 2014
Ahsnp428	[C/G]	AGCTCATGCTCATATGCCACAACAACAAGAAGAGGCAGAGGAGCAACCATAGTTCCTAGCACTTCAACCGCCACAATATCA[C/G]CAA	Zhou et al. 2014
Ahsnp461	[A/G]	AGCTCATTATGAGGGTATAGGGCCTGAGATTTGGGAACAAACCAATGGAAATTTGGAT[A/G]CATTTGTTGTAGCAGCAGGCATTATT	Zhou et al. 2014
Ahsnp506	[A/G]	AGCTCCAAGAAATTTCAACTGGAAATAAAAGAGAAAGAAGCAAAGAATTACGGAGGCTACTGACAATCCATCAGGACA[A/G]CAACAA	Zhou et al. 2014
Ahsnp536	[C/T]	AGCTCCACGAAAAATAGAAGAATCACAC[C/T]GGTGAAAGAGAAGGAACGAGAAGAAGAAGAAGAAGAAGAAAAAGAAGAAGAAGAAG	Zhou et al. 2014
Ahsnp546	[A/G]	AGCTCCA[A/G]CACCTACTCCCTCAAATTGACGCCATCTACGGGATCGAAGGGCTGATTAGTAGTAGAGGCAAATGAATGTCTCAATA	Zhou et al. 2014
Ahsnp592	[T/A]	AGCTCCCATAGTTGGTCTTCATGCTTCGAACCGGGATCTATATCTTATTT[T/A]CACACCCGGCTTCAAATTGAGCATCATGCTTCTT	Zhou et al. 2014
Ahsnp604	[G/A]	AGCTCCCGACGA[G/A]CTACAGACGGTGGCGACGGTCACAGTTCGACAGCGTGAGAGAGAGAGAGAGAGAGAGAGAGAGAGAGAGAGA	Zhou et al. 2014
Ahsnp605	[C/T]	AGCTCCCGAGGTCATGGCAAGCCTGTAACCTAAGAAGGTACTACAGCTAGAAAAACGTCTTGGCCAAAGCGTGCTCTTT[C/T]TCCCC	Zhou et al. 2014
Ahsnp611	[C/T]	AGCTCCCGGGCATCCCTATAGATAGTAGGCCAGTAGAATCCGCATTGGAGGACCTTAGTGG[C/T]TGTTCGCTCACCTCCGAAATGTC	Zhou et al. 2014
Ahsnp633	[T/G]	AGCTCCCTTTCTCCTTGGCAAGAAAATAAATTGTAAGAAAATAAAGGAAACTCAAATGGTAAAAAGGTCTTGGCAAGGG[T/G]TGATG	Zhou et al. 2014
Ahsnp752	[G/A]	AGCTCCTGAAAGGGTGAAATAGGATCTACA[G/A]CCAAAGATGAAAACTAATCAAGTGCAGGACTGTCAAAAAAGGTAAGAAATCTGC	Zhou et al. 2014
Ahsnp831	[C/T]	AGCTCGAGCAGGGGCACTATTCATACCCGGGGTCGAGCTGGGTGACCCGGACAGAGTAAAGACACAAGTGACCGACCT[C/T]TTCAGG	Zhou et al. 2014
Ahsnp892	[G/A]	AGCTCGGACGGAAAAGTTACGGG[G/A]GATTGAAGTTCACTGTATGGGTTCGGTGTTTTCTCTTTTCCCTGGATGCATTTCACGTTGC	Zhou et al. 2014
Ahsnp979	[G/T]	AGCTCGTGCTTCCTGGGATGGATGATAATGTCTGCTATATAAACCTTGACTCCTCCCGA[G/T]TTGCTGATTGGATGTGGGTCTACGA	Zhou et al. 2014
Ahsnp992	[C/T]	AGCTCGTTGGTGCTTGTTTGAGCTAAATTAGTGATTGGATTGTGGTTGAAAGCTCACTTGATTTATATTGGGAATCGGC[C/T]AAGGT	Zhou et al. 2014
Ahsnp1000	[G/T]	AGCTCTAAATGGTGCGCTCTCAATTGCGTTGGAAAGTAGACATCCAGGGCTTTCCA[G/T]CAATATATAATATTTTATACTTTATTCG	Zhou et al. 2014
Ahsnp1027	[C/G]	AGCTCTACAAAGCCCATAGAACAATTTGGTAAGTACCTTAGTGTTTTCTTCTAAGCCACTCTCTCCTAATTT[C/G]GAAAATTTGAGG	Zhou et al. 2014
Ahsnp1030	[C/T]	AGCTCTACAAAGTCCAAGGCATGATTTGGTAAGGAACCTTCATTCTCGTTCTCAGCCTCACTTTTT[C/T]CCAAATTTTCGAAATTAT	Zhou et al. 2014
Ahsnp1054	[G/A]	AGCTCTATCCTTCACAATTCTCTTGACCAATACTATTCGGGAGGAATTGAGGTCTTGAGCAGGGAC[G/A]GATTTATTCATTGGGGAG	Zhou et al. 2014
Ahsnp1084	[C/A]	AGCTCTCCTAGGCCGAGGAGGATGATCCCGACTCCCCGGGTTTGTTTGGTTGATCCGCCT[C/A]AACTTTAGTTGGTACCTCTGCTCC	Zhou et al. 2014
Ahsnp1091	[C/A]	AGCTCTCGCGAGGTGCGTGCC[C/A]TTTCCTCCCAGTCGTTTGCGTCGCCATTGCAGATGAAGCTGCGCTACTAAACACTCAGCTTGG	Zhou et al. 2014
Ahsnp1115	[A/T]	AGCTCTCTTTCTTGAAAGTTCGACCCCAGGAAATGGTGGAAAGTGAGGATCCCCTTCTCTGTTCCTCC[A/T]GGTATTGTAAAATCGC	Zhou et al. 2014
Ahsnp1194	[C/T]	AGCTCTTCCACTTAGGCTCCCTTTGCGTCCTATAATCTC[C/T]GTTTAGCCCAGCCAATATGACTTTGTTGGCAGCTTCGGCTTGTCC	Zhou et al. 2014
Ahsnp1222	[C/T]	AGCTCTTGGCATGTAAAAGAAA[C/T]AGAATTCAAATATCCATCAGAAACATAAACCAAGAAGTCATGCAATACTAGCAAATGCTTGT	Zhou et al. 2014
Ahsnp1223	[G/A]	AGCTCTTGGCCCAGATGACCGAACTAA[G/A]CAGAAGTCAAACGGCTTGCTGAGTTGACCGCCTAGAACAACGCCAGCAAGAATGATG	Zhou et al. 2014
Ahsnp1238	[C/A]	AGCTCTTTAGCAATATATAATAGTTTATACTTTTCTTTGGAAATGACTACCCAAAATGGGTGTTGAACGC[C/A]CAACTTACACACTT	Zhou et al. 2014
Ahsnp1250	[C/T]	AGCTCTTTGAGAGAAGGTCGGGTAGTCTGACC[C/T]GAAGAGGTCGGTCGCTTTATCGCCAAACATCCTGGGTTAGACAGGTTGATCC	Zhou et al. 2014
Ahsnp1277	[G/A]	AGCTCTTTTTTTGGGCTCATTCATGCTTCCTTGAGTTTCAATTTTCTTGTTCTTATTTTTTT[G/A]GGTCCTAAAGATGACTCTAATT	Zhou et al. 2014
Ahsnp1288	[T/C]	TAATAATAGAGCTTTATGGCAAGACAAGGCAGAACAAGATTAGTCTTACCAAACGAAATAAGGGGATGGAGCAT[T/C]AGCAGCTCCA	Zhou et al. 2014
Ahsnp1326	[T/C]	TAAATGCCATTGTTGCTGCAGCAGCAAATTGATTATGTAGAGGCCGAAATTGTTGTTGAACTGCAT[T/C]ATGAGTAGCGTAAGTGGG	Zhou et al. 2014
Ahsnp1360	[G/A]	TAACTTTTCGAGAAGCAATATACTGTTACCGTGACATAATAAAG[G/A]AAAAAACAATAAATAAAAGGATTGAATATAAGGAGGAATG	Zhou et al. 2014
Ahsnp1462	[G/C]	TAACAAAATAAGCAACAAGAA[G/C]AAGAGTGCTATCACTAATGGATTCACTTTACCTGATAATAATAATGGCAGAGCAATAATCC	Zhou et al. 2014
Ahsnp1493	[G/A]	TAACTCTCACTCTCTCAACGCAGCTCTCTTCCCCTAAATTGATACCCTAGCTTATAGTAGCCTCCACCGCCACCGCAAG[G/A]AGGGA	Zhou et al. 2014
Ahsnp1512	[G/T]	TAAGAAGAGTCCATCCTCTTCCGCCATTCA[G/T]CAAAAGGAACGCTGAAGCATACAAGGGGGAAAGAAGATAGATTTCCAAACCCTT	Zhou et al. 2014
Ahsnp1517	[C/T]	TAAGACCAATGGGGTTGATCT[C/T]GAGGTCTACAGACTTATGCTTTTCCCCTTTGCTGTAAAAGACAGAGCTAGAACATGGTTGGAC	Zhou et al. 2014
Ahsnp1559	[T/C]	TAATC[T/C]AAGTATGCTTGAAATCTTTATTGTGCTCATTCCTAAGATTGAAACCTCTAGCCAAATGAAAAAATTTAGATCAATTAGT	Zhou et al. 2014
Ahsnp1589	[T/C]	TAATGTAATTGTTTATG[T/C]TTTGCTCCCTGCTGAAGCATCTCCCAAATTGGAGTAACCCTGTAGTGGTACTCTCCTGTAGAGAGGA	Zhou et al. 2014
Ahsnp1616	[G/A]	TAATAC[G/A]TCTTGATGAAGAGAATCTGTAGAAAATCTTGAAAAAACTTTATAGAAAATATGCAAATATATACATGTGGGAGCTATG	Zhou et al. 2014
Ahsnp1683	[C/T]	AGCTCCAGTCGCCATATCTTTTGCAGCCACGCGAC[C/T]GCAGCGTCGAGCTTTACAAAGCCCAATGGTCAATTAGGTAAGAAGTTTC	Zhou et al. 2014
Ahsnp1761	[A/G]	AGCTCTGCAGCATTCATGAATTCGCAATTTCATGGGCTTACTCATCTTTCCATTCATGGTGAATACGGC[A/G]AGAGTGTGAAGTCTC	Zhou et al. 2014
Ahsnp1851	[C/A]	TAAACTTTGAGTGCCTCTGCCCCTTCCAGGGCGTTCAACGC[C/A]AAGTATGGGCATTGAACGCCAGGTAGGGACACTTTTTTTTG	Zhou et al. 2014
Ahsnp1907	[C/T]	TAACGTCCTAACTACTGAGATTGGATGGGCTAGAACTTTCCAATTACTTCTCCTGATTTCTTGTAGGATCTC[C/T]AGATACTCATCA	Zhou et al. 2014
Ahsnp1913	[G/A]	TAACTATTGCCGGCAGTGACATGGTGCTGAGATGCCACGATGGGTGCCATGCTGGAGTGTCACTTTT[G/A]GTGCTAAAAATATGGAT	Zhou et al. 2014
Ahsnp1932	[C/T]	TAAGATCACTTATGGACCACCCAAGAGCTGTCTTGTGTGTACTTAGCACCTGAATTAGTGCTTTCTTCTGTGGCTCTAAAG[C/T]A	Zhou et al. 2014
Ahsnp2033	[T/A]	TAATTGTTGGTCTAGACTATACTTTCAATGATAGAA[T/A]TATATTTTGTGAAAATCTAGATCGACGATAAATTCTTCATCGTCAGAA	Zhou et al. 2014
Ahsnp28	[A/G]	AGCTCATGGCAACAAAATATACTAAGAAAAATAAATAATAAATACTACAGATAAACAAAAGAAACAC[A/G]CAAATAAAAGATGCAAT	Zhou et al. 2014
Ahsnp31	[C/T]	TAATATAATCAATATGGTCAAATCCTTGGAGGAGGATGAGGATGTGAATCCCAA[C/T]GAGGAAGACCTCAGGGGACGTCCAATGGTC	Zhou et al. 2014
Ahsnp46	[T/C]	AGCTCCGAGGTATAGACCGGATGCAG[T/C]TGGAAGAGTGCTGGCAACGTCCTACTCCTGTGTACTGCACCACAGGTTTTTTCCTTGC	Zhou et al. 2014
Ahsnp108	[C/A]	AGCTCTAGGGATACCTCCCCTAAGCAAGTGAGTAAGCCTTCTTTAGG[C/A]ACTATGGACACTCACTATACACCACCCAAAACTCATG	Zhou et al. 2014
Ahsnp109	[C/T]	AGCTCTATTCAGAGTAAACGAGCTA[C/T]ACCTCGGAGTCCAGTTCTAGGACGGAATATTTGATGCCTATCATGGGCCCAAGACTTTT	Zhou et al. 2014
Ahsnp116	[A/G]	TAAA[A/G]AAAACGTACCTCATAGTAGACACAGTCCCAAAATCGCTGTCCAAAGTTGTTCTTCTCGAAATTTGTAGCACGGGTCTC	Zhou et al. 2014
Ahsnp118	[G/A]	AGCTCAAGACTAGGCAAGACCCCCACTTTATCAACCAGGATACCAATCC[G/A]AACCGTCCGGTACCTGACCTACCGAACGACATAGA	Zhou et al. 2014
Ahsnp126	[A/C]	TAACAATCCACTTGCCATACGAAGTAAGAGTGTGTGGATCAGTATA[A/C]TTTAGGTGGACGTACCCTTTTGAAAGGTTGATGGCTCA	Zhou et al. 2014
Ahsnp147	[C/G]	TAAAAAGCACCCATCCAAATGCAACAGGAAACGACATCCATCTTTGAAACCTTGTTTGCAGGCATCTAGGCAAAT[C/G]TATAATTTA	Zhou et al. 2014
Ahsnp153	[A/C]	AGCTCAAAAACACATAAACTAGTGAGATTTTGAATCGATTTGATTGGTTGCAT[A/C]TTATCAACCAATGCTTTATTTTGGTGTGTGT	Zhou et al. 2014
Ahsnp154	[G/A]	AGCTCAAAAACTTATCATCTTCA[G/A]CGACTCACAAGTAGTCATGGTGCACGAAATTATAATCATCAATGACGCCATCAACATAGTA	Zhou et al. 2014
Ahsnp188	[G/A]	AGCTCAACAAGAGTCAAATGATCGTTTCAAGGAGACAATGGATCGACTCAAT[G/A]CAACCATTCAACAACTGGGACAAGCGATAAGC	Zhou et al. 2014
Ahsnp220	[G/A]	AGCTCA[G/A]GCTGAAACCATAGACACATCGAACAACTTCACAAATAGGGAATCAACTTATCTACCCTCCTACAACATTGAATCAATA	Zhou et al. 2014
Ahsnp221	[G/A]	AGCTCAAGCTGAAACCATAGACACATCGAACAACTTCACAAATAGGGAATCAACTTATCTACCCTCCTAC[G/A]ACATTGAATCAATA	Zhou et al. 2014
Ahsnp262	[T/C]	AGCTCACAAAACATGTGATTCTTACCTTTTTCTTTGTATCTCTATAATCTTTCACTCTAAA[T/C]GAGAGTATCTCTCTAAACAACTA	Zhou et al. 2014
Ahsnp269	[G/A]	AGCTCACAGAATTCCTATTTCTTTATCGCC[G/A]GTCTCAACTAATGTTCTTCCTCTTCTCTTCTCTTCTCTGATTCTTCTCCTTCAT	Zhou et al. 2014
Ahsnp320	[A/G]	AGCTCACTGTTCAACAGAGAAGACGGAAGCTCGGTCCTAAATGGGCTCAAGT[A/G]GTCGAAGAACAAATACAAGCCCTTTTAGAGGC	Zhou et al. 2014
Ahsnp341	[G/A]	AGCTCAGATTGATGAGCTGTCT[G/A]TGGTCACGCGTTTGTCTCGGAGTTCTCTTCAATTCTATCTAAACAAAGACGTATGTCTTTCT	Zhou et al. 2014
Ahsnp413	[G/A]	AGCTCATCTGTCGGTTACTAACCCGCTCCCGACGATCCAGCAACCTCTGTCT[G/A]GATAAGGCTTTCCTATTGGCTATACCCCTGTG	Zhou et al. 2014
Ahsnp415	[C/T]	AGCTCATCTGTCGGTTATACAG[C/T]CAATCCCGACACCTTCGGTAGCTAACTCAGATATAGAACACCACAACACGGAATATGTATTA	Zhou et al. 2014
Ahsnp435	[T/C]	AGCTCATGGCCAGTAGGATAGGCATGCATCATTTTCATTTGTGTATATTGATTGGATGTGCTT[T/C]GATAAACCCCAATTTTAGCGT	Zhou et al. 2014
Ahsnp439	[C/T]	AGCTCATGGTCCACCATTTGTCAGAGGGTGAATCCCAGGTCCCCAGCAACGACGTCAATGTCCCGAGGGTTACATGAAA[C/T]GTTTG	Zhou et al. 2014
Ahsnp449	[T/C]	AGCTCATTACCTGCACTAGGGATAAACATACATCATAC[T/C]TATTTGAACATACGTGTTTGTAATTGTGTTTTCTATGATTGTGTGT	Zhou et al. 2014
Ahsnp452	[G/A]	AGCTCATTACCTGCGATAGGAATAGGCATGTATCATCCTTGTTTGCATATTTTATATTTG[G/A]TTCGGTGTGTAAATTGCTTGTGAT	Zhou et al. 2014
Ahsnp459	[G/A]	AGCTCATTAGCTTCTTCATGTGTAT[G/A]GAACCACTTGCAGAATTATCCAGAGACATCTTGGCTATGTCGGAGAGTCCATCATAGAA	Zhou et al. 2014
Ahsnp525	[G/A]	AGCTCCACACCTTACTCTATGGTGTGTAGAAACTCTACCATTGAAAATACATAAGTGATAAAGGTATTCATT[G/A]GTTCCAGCCATA	Zhou et al. 2014
Ahsnp552	[T/C]	AGCTCCAGTACTTTACCTAAAAAACGCCGAGGTATAATCTCAGCAAAAAAGCTCAA[T/C]TTGCCATAACAACATCAAGTCAAGCTTG	Zhou et al. 2014
Ahsnp589	[T/C]	AGCTCCCAGCTGCGTTG[T/C]TCGCGCTAGCTATTGTCGTCTGGTTTTGAAGATGCTGAATCCAACACAAGAGAATCCAAGGGAAGAA	Zhou et al. 2014
Ahsnp637	[T/G]	AGCTCCGAGAAGAACTTAGGGCTA[T/G]GGTTATCTGACTTTAGGACAAAATGTCAAGGATTGTTTTGGTATTTTGAAAATATGGAAG	Zhou et al. 2014
Ahsnp640	[C/A]	AGCTCCGATCCATGACGGATTAGT[C/A]CTTCACCTGTCGGGTTGGGGATACCGTGGGCAACCAAAAAAATAGACTATAAAAGTATTA	Zhou et al. 2014
Ahsnp661	[T/C]	AGCTCCGATTGCCGCATCGTTTGCGGCCACACGTCCACCACGTCAAGCTCTACATTTCTACTAGAACAATTTTG[T/C]TGGTAACTTG	Zhou et al. 2014
Ahsnp696	[G/T]	AGCTCCTAGGTACCGAGCAATTTACTCTTCCCTA[G/T]TTTCTTCATCCTAACTTGAGGATGAGTAGTCATTAGAACTCATACACTAT	Zhou et al. 2014
Ahsnp703	[T/A]	AGCTCCTCAAACTTGTTGGTGTAATCTGCCACAGATAGGGAACCTTACTTCAGCTGCATTAGTTCTATCTCCTTTGCT[T/A]ACCTTG	Zhou et al. 2014
Ahsnp704	[C/A]	AGCTCCTCAAACTTGTTGGTGTAATCTGCCACAGATAGGGAACCTTACTTCAGCTGCATTAGTTCTATCTCCTTTGCTA[C/A]CCTTG	Zhou et al. 2014
Ahsnp736	[C/A]	AGCTCCTCGCCGGTAATAACATCCTCGGGCCAAG[C/A]AGAAGAGGACGGGAACAAATCAAAGGGAGGAGGTTGTTCTTTAGGCAGAG	Zhou et al. 2014
Ahsnp759	[C/T]	AGCTC[C/T]TGCACCTGCATCCTCAAATCAATGTCTTCCTCAGAATCGACGACTCAACTGGTGGCAGAGGTGGACATGGAGGGGTGGA	Zhou et al. 2014
Ahsnp769	[C/A]	AGCTCCTTACCCCCAACCATGGGGTTTAGAGACTCATTACGT[C/A]AAAGGTACAATTTCAGATGTAAAATGACATGAGGTCTGATGA	Zhou et al. 2014
Ahsnp852	[C/T]	AGCTCGATTTGGGTCCCCTGATCACCCTCTATAATTATGCCTGCACCA[C/T]TTCCCATTTTGTTCGAGGAGCCATCTACGTAGAAAT	Zhou et al. 2014
Ahsnp860	[A/G]	AGCTCGCAGAGTAGCAGACAAAGGAACTCACTACTTCAAGCTCTGGGAGAGGAAGGAGACGCACCCTC[A/G]GAGAAGGCAAAAATGG	Zhou et al. 2014
Ahsnp894	[G/A]	AGCTCGGACGGAGGAGTTAC[G/A]GCGTGTTGAAGGTTTCCATTAGGTTTGTTGTTATCTTCCTCCCTGAGAGCGTTGCTGCTTCTGT	Zhou et al. 2014
Ahsnp920	[T/A]	AGCTCGGCCTAACTACC[T/A]GGAAAGCCCATTATAGGGCCCAAACCGAGGAACACGACCCGAATCAAAGGGCAGCCCAAGCCTATGG	Zhou et al. 2014
Ahsnp943	[A/C]	AGCTCGGTCCTGCTGACTTCTACTGGGATAAGTGCTTCTGCGCCATATACCAGCTTGAAAGGAGTCT[A/C]TCCTGTGGCAGATTGAA	Zhou et al. 2014
Ahsnp956	[A/G]	AGCTCGTAATTTTGTATCTTTGGCACTCTATTCCTACTTTTATAATCTTATGTTTGATGGTTATAGCTTTCTTAGCACGCA[A/G]GGT	Zhou et al. 2014
Ahsnp978	[C/T]	AGCTCGTGCTCCGAGTGATTGCAA[C/T]AAATGCCGCCGTGTATTTCTTCTAGCACTTCCCTTGTGTTGGAGATCGGCACGCATTTTA	Zhou et al. 2014
Ahsnp980	[A/G]	AGCTCGTGGATAG[A/G]TCAAGCTCAACCCAAGCATACACCAAGTGGGCCCCGAAAGGGGATTTATGCATCAATTACTTACTCATGAA	Zhou et al. 2014
Ahsnp1017	[C/T]	AGCTCTACAAAACGGATCGACAGAACAAAGGCAAAATGCTCGAGCA[C/T]GACTTCCTCAAAGGTCGAAGTCTAAAAACATGACCTCA	Zhou et al. 2014
Ahsnp1028	[G/A]	AGCTCTACAAAGGCCA[G/A]TTCTTGATTAGGTATAAACTCACTTCTCAGTTTCAGGTTTCTTCTCTCCACTTTTGAAATTCAATGCG	Zhou et al. 2014
Ahsnp1037	[G/A]	AGCTCTACGCTTTCAAAG[G/A]GAGCGCTGCAAAGGACGCGTACACGTCGATGTGCCGAAATGCTAAACGACACGCACGCGTGGGCGA	Zhou et al. 2014
Ahsnp1150	[G/A]	AGCTCTGGTAAATCAACATCAATGATTCAAACTCAACATATAATTCGATAATTGAGACTTGTTGTAATACCCG[G/A]TCTAACCGAAA	Zhou et al. 2014
Ahsnp1155	[C/T]	AGCTCTGTAGCTCAAGTTATGACCAATTTAGTACTGAGAGGTCAGGG[C/T]TGGCAGCTTTCCAAATCCTTCATTTCTTGAATTCTTC	Zhou et al. 2014
Ahsnp1162	[T/G]	AGCTCTGTTCTTTATAGTACGCTTGAATGAGCCATCAACCTTTCAAAAGGGTACGTCCACCTAAA[T/G]TATACTGATCCACACACTC	Zhou et al. 2014
Ahsnp1185	[G/A]	AGCTCTTCACAAAGAATGCGTAGCCACTGACGACACGCAAATCAGAGAACCGTAGCTCAAGATATCGCGGATTG[G/A]ATGGAGAAGT	Zhou et al. 2014
Ahsnp1187	[C/G]	AGCTCTTCACTTCATC[C/G]CTAATTGTTTCCATTGACTCAAATTACAATCAATGCATATATATAAATCACACTCTATTGAACCCTCA	Zhou et al. 2014
Ahsnp1226	[C/T]	AGCTCTTGGTTGATAGTATTTTCCACGCCCATGG[C/T]TGTTGTTTCCCACACGAGCATTTCTTGCTGATGCCAATTTCTTCACACAC	Zhou et al. 2014
Ahsnp1259	[C/T]	AGCTCTTTTAGTTGCACTATCA[C/T]AAGATGACAATGGGAATATTGTGCCTCTTGTATTTTCCATAGTTGAGGGTAAGAATGTCGAT	Zhou et al. 2014
Ahsnp1282	[C/T]	TAACAAGTAAAGAAAATCACAAACACACTCAAACAATCACAAGCAATTTACACACCGAA[C/T]CAAATATAAAATATGCAAACAAGGA	Zhou et al. 2014
Ahsnp1306	[T/C]	TAAACAAGAAATATACAAATAGGAGCAAATAAGGCATTTAGACAATTAGCAAGTAAAATGCAGA[T/C]AAATAGGCAATCTCAAACAA	Zhou et al. 2014
Ahsnp1339	[G/A]	TAACACGTCCATCACTCGATCAAAATTATCATGCATCATTCAGAAGGACTCAAATATACA[G/A]GGCGTGTTCACCAAATCCCTCATG	Zhou et al. 2014
Ahsnp1341	[G/A]	TAAGACGAGGGCGTTCTCCGCGAAATCTCT[C/T]GGCACTACCTTTTGATTATATCTGGAAGCCATTCGCCGCTTTAGTGCTTCTT	Zhou et al. 2014
Ahsnp1396	[G/A]	TAAATAGAAAGTGTCCCTTCGACATGCTTTCTGAATGGAGCATCATAGGTATTTTCTATGATGGTCTCTCT[G/A]AACTATCCAAGAT	Zhou et al. 2014
Ahsnp1405	[C/T]	TAAAATAAAAAACAAAATCCAACAAGCAGAACACTTCCTC[C/T]TGGTTCTCTCTCTCACAAACGCAACTCCCTGAACCCTAGCAGAG	Zhou et al. 2014
Ahsnp1449	[G/A]	TAAAGTTCAAGTTCCCT[G/A]CCTCAAATAACCAAGCTGAATACGAGGCCCTGCTGGCTAGATTGAAGCTGGCTAGGGAGATAGGAGC	Zhou et al. 2014
Ahsnp1469	[C/A]	TAACCATCAGTTTCGATACCACTTTGTTGAGTCATCGTGGAAGTTTTCGGCCACCAAATCGA[C/A]TCTGATACCACTTATTGAGCCA	Zhou et al. 2014
Ahsnp1474	[T/C]	TAACCTATTGCCAATCTCCCCTTTCTTCCCTAACCCTAGTCAGCCACCAATCAGCCGATCTCCCCTTTCTTCTCCCCTAAC[T/C]C	Zhou et al. 2014
Ahsnp1502	[C/T]	TAACTTCTATGTGCTTGGTTCGTTCATGATACACTGCATTGGCTGCTATG[C/T]GTAATGCAGATTGACTATCACAATAAATGATTAT	Zhou et al. 2014
Ahsnp1503	[C/T]	TAACTTCTCTGATAAAG[C/T]CGGCTTCCAGGAGCGCCTGTACTTGCTCTTCCACTATGGAGGCCCTCTCTGGGAGGTCGAGACCC	Zhou et al. 2014
Ahsnp1511	[G/A]	TAAGAAGAGGTCGGTCGACTTGTTGTCAATCAGCCCAGGTCGTACAGCTC[G/A]ACCCAGGGCATGAACAATGCCCCTGCTCGAGCGT	Zhou et al. 2014
Ahsnp1632	[G/A]	AAAATAGGTATTGAGTAGACTCCGAGTATGAGTTATACCTGGGTGCTCCA[G/A]TGTATTTATAATGGTGAGGAGGGACCTTCTGTGG	Zhou et al. 2014
Ahsnp1659	[C/T]	AGCTCACATTTCAAATGATCTTGTAG[C/T]CCAACGATGAAGAAAAGATATCACCTTTTTTTTACTCGACACCGTGACTTGGTTGTTA	Zhou et al. 2014
Ahsnp1660	[A/G]	AGCTCACCCCT[A/G]TGAATATACACCAGTGAGGGTATTGGATATAGATTATGATTATGTTCACGATGATGATCGAGAATAACTTGAG	Zhou et al. 2014
Ahsnp1662	[T/C]	AGCTCACCT[T/C]TTCTGCCAGTGCCTTGTGAAAGTTCGCGTTGTCTTTGTACTTGGTACATTTTTCCACATACTCGCTAGCATCCGT	Zhou et al. 2014
Ahsnp1671	[G/A]	AGCTCAT[G/A]AATGGTAATAGTAGGTTCAATAGAATCTCTATGGTCTCTAGATGAGCCTCAGATTCCTGTGGTTCCTCACTAGGTGA	Zhou et al. 2014
Ahsnp1676	[A/G]	AGCTCATGGCCA[A/G]TAGGACAGGTATGCATCATTTTCCTCTATGTGACATTGTTTGGGGGTGTTTATTGTATATGTGGTTTGCCTT	Zhou et al. 2014
Ahsnp1692	[G/T]	AGCTCCCCACAGTGGCTCAATAAGTGGTATCAGA[G/T]TCGATTTGGTGGCCGAAAACTTCCACGATGACTCAACAAAGTGGTATCGG	Zhou et al. 2014
Ahsnp1834	[C/G]	TAAAAGACTGTCTGCCACAAGAGAGCAAATGTGGTATTGTTGAGCCTTA[C/G]GGCCAAATGTAAAGTGGGGACGCCCACAGCCCCAA	Zhou et al. 2014
Ahsnp1938	[T/A]	TAAGCTTAGCCCAAACACTCACCAAGTGGACCCTGGAAATGGA[T/A]TTTTGCACTAAAAGACTATTTTATCCTTTTTATGTAATCCT	Zhou et al. 2014
Ahsnp1952	[C/T]	TAAGTCAGCAAGAGTCTATCCAATGGCATTCTTGTGCTTCCTCAATACTTGGAGTAGTTCATCCTCTTGATT[C/T]TGGCTGAGGGGG	Zhou et al. 2014
Ahsnp1966	[A/G]	TAATACACAAATAATGAGAAATTTCATAAGGTATATCAAAGTTCTTTGAATTGTAGTTGTTTAGAGAGATACTCTC[A/G]TTTAGAGT	Zhou et al. 2014
Ahsnp2003	[G/A]	TAATGCATCATTTACTTACTTCCGTAAACCCTAGTAACTAGTTTAGTATAAATAGGAC[G/A]TTTTACTATTGTATTAGACATCTT	Zhou et al. 2014
Ahsnp15	[C/T]	AGCTCAACAAAAATTGCTGGGAAAGCCCAGTAAAGGGCCTAAATAGAGGAACA[C/T]GACCCAAATCCGAAGGCAGCCCAAGCCTATA	Zhou et al. 2014
Ahsnp19	[A/G]	AGCTCGTGCCGTCACAAAGCACCTCTTCGTTGCCAAGAAGCCCTCGCTATCACTATGTAGACCTCTCCGTC[A/G]TTGAGAACCCTGT	Zhou et al. 2014
Ahsnp64	[G/A]	TAATAGCAAACAAGCAACACAAGAACTAAAGAT[G/A]AAAAATGGAGGTGAAGAACAAGTGTAGAGACCTTCACTAATGTCATGAGAT	Zhou et al. 2014
Ahsnp134	[C/T]	AGCTCCAGACGCCTACCGAAGTG[C/T]CTCTTGACCTGCATCTGAAAAACAACAATATTGTATGGAGTGAGAACCGGGGGTTCTCAGC	Zhou et al. 2014
Ahsnp143	[C/T]	AGCTCGAAC[C/T]ATAACTACGCCTTTCCATTTATGGATAAGATTAGGGTTTGTGTACTTGGAACTAATTTCATATAGTTCCATAAAC	Zhou et al. 2014
Ahsnp144	[A/C]	AGCTCGAACCATAACTACGCCTTTCCATTTATGGAT[A/C]AGATTAGGGTTTGTGTACTTGGAACTAATTTCATATAGTTCCATAAAC	Zhou et al. 2014
Ahsnp173	[C/A]	AGCTCAAAGGGGGCAAGGGTTGCAGCTTCAGTAGTCTCTGGGACAGTGAAGGTGATTTGG[C/A]CAAAGCTAGGAAGAACAAGAGGAA	Zhou et al. 2014
Ahsnp187	[C/T]	AGCTCAACAACATGGGCGAGTTCTCACTATGACGGCGAACGGTGTGGCTAGGT[C/T]AGACACTTTGATAAGAGGGAACTATGAAATT	Zhou et al. 2014
Ahsnp208	[G/A]	AGCTCAACGTAGTCATTGGGCGACAGCTTGAGTGC[G/A]TATATCTTTGGCCCCTGGTCCACGAGTTTGACTACTTCCACTGATCCGA	Zhou et al. 2014
Ahsnp260	[T/C]	AGCTCAATTGAGCGGGTCTATGAAGTTGTTCGGA[T/C]GCTTCCGTGAGAATTCAGATTGCTTGCCACCCGGTTTGAACAATGATGAT	Zhou et al. 2014
Ahsnp263	[C/A]	AGCTCACAAAT[C/A]TCAACACTTTTTACCCAAATACTCAAAATCAATGCTGGGATTTCAAAGGGGAAAAAGTGGCTTACTGATGAGC	Zhou et al. 2014
Ahsnp282	[C/T]	AGCTCACCA[C/T]CGCCGTTCATGCATGCTCCTCTGTTGATTTGAATTTTTTCGAACCAGATCTCTTTTTGAGCTTTGAATTTCTGAT	Zhou et al. 2014
Ahsnp283	[G/T]	AGCTCACCATGGCCACCTTAGCAAAGCTTTGGATCATTTAGCTTCATCGCGTTCAT[G/T]CCACGAGCGAGAAATTCTAGTGGATAAA	Zhou et al. 2014
Ahsnp348	[G/A]	AGCTCAGCCAATCAGAGCCAAGC[G/A]AAACTACTAATAAATTTGTTCAAGGACGGTTACAAATTGGAACAGCTAGGTTCCAATCAGT	Zhou et al. 2014
Ahsnp353	[C/T]	AGCTCAGCGGCAAGAGGATTGTAACATGAGAGAAG[C/T]AAGGAGGTCATGTCGATCCGAACGAATTATACTTTCCACGGAGGTAAAT	Zhou et al. 2014
Ahsnp367	[T/A]	AGCTCAGTATTGCGGCGGATTAGTCCTTGGCCTGCCGGGTTGGGGGATACCGTGGAAAATAAAAAAAAAA[T/A]AATAATAACCTTGT	Zhou et al. 2014
Ahsnp462	[T/A]	AGCTCATTCACAATCTCATGACATTAGTGAAGGTCTCTACACTTGTTCTTCACCTCCATTTTT[C/T]ATCTTTAGTTCTTGTGCTGCT	Zhou et al. 2014
Ahsnp476	[C/T]	AGCTCATTTCTAGCCCAGTTTTGAGCG[C/T]AGTCTACAGATTAGAGGCTAGGAGTGTAGTAGGAAGGAGGACATTACACACATTAGC	Zhou et al. 2014
Ahsnp509	[C/T]	AGCTCCAAGATCAAGCGATTATTGAGCTTGAACCCCCACTTGAAAC[C/T]AATTTCGGGAGCATACCTCCACCATGGTTCCAGAGACA	Zhou et al. 2014
Ahsnp514	[A/C]	AGCTCCAAGTCTATTGGCACCATTGTTGATGATCACAGTTTATGCGCACTAATGATCCTGAGAACC[A/C]TGCAATAGCAGAGGTGAA	Zhou et al. 2014
Ahsnp580	[G/A]	AGCTCCCAAGGTACCTCAGCTCAGCGGCCTAGCTGAGTGATCAGATATGGAAAGGGCAGAGTGCCTTTGACATGGACCCTG[G/A]CCA	Zhou et al. 2014
Ahsnp581	[C/T]	AGCTCCCACAAGTCCTATAGTCATATCGAACAATGCCACATTCTACCA[C/T]AAAGGAATTACCCTTCCAATTGGCGCACGGACTGGA	Zhou et al. 2014
Ahsnp585	[G/A]	AGCTCCCACGTTTGAGCCAACGTTAGCCCCCTAACTTGGAGGCTAAC[G/A]TTGGCAAGAGAAATTTTATTCCTTGGGCCACCAACGT	Zhou et al. 2014
Ahsnp655	[C/T]	AGCTCCGATTGATGAGCCGTTAGTGA[C/T]CACGTGTTCGTCTCAGAACCCTCTACAAAACCCATATAATAATTTGGTAAGGAATTCA	Zhou et al. 2014
Ahsnp668	[C/T]	AGCTC[C/T]GCGCTAATTGCCGTCGTGCTTCTTGGTCACCATTGAACAGAATCGTGAAGGGAGGGAGAGATGCTCGAAGGAGACAAGG	Zhou et al. 2014
Ahsnp706	[C/A]	AGCTCCTCAATGT[C/A]TCTTCCTTGCCTTTGTTGCTCCTCTCTCATGATTCTTTGATCTTCTCTAATATCTCTAATTACCTTTAGTT	Zhou et al. 2014
Ahsnp707	[G/T]	AGCTCCTCAATGTCTCTTCCTTGCCTTTGTTGCTCCTCTCTCATGATTCTTT[G/T]ATCTTCTCTAATATCTCTAATTACCTTTAGTT	Zhou et al. 2014
Ahsnp725	[C/T]	AGCTCCTCCACATACTCCCATGTTGGCCGCTGGTGCCAAGTCTGGAAGTCACGCAAGCACCCACCCATCAGTTCG[C/T]CGTCTGTGC	Zhou et al. 2014
Ahsnp738	[C/T]	AGCTCCTCGGCCCACGCA[C/T]CCTTTGCGTCTTTTAGTCAGTACTTGAGTCCAGCCAATATGACTGTATTAGTAGCTTTTGCTTGTC	Zhou et al. 2014
Ahsnp826	[G/A]	AGCTCGACTGCTTAGACATCG[G/A]GTGCCCCGCCTTTCCGGAGGTCAAGTACTCGGTGTGTTTTGAAAATTTGAATATTGCCTCCCT	Zhou et al. 2014
Ahsnp835	[A/C]	AGCTCGAGGTTCAAGTTTACTATGTTCATGAGG[A/C]TGAAGAAGAACAAAAAATACACAACCAGGCTCTTATACCATGTTAGAAATA	Zhou et al. 2014
Ahsnp839	[A/G]	AGCTCGAGTTCCTCTTTCTGGGCTTGG[A/G]TGTTTCCTACCTCGTTATAGAATCTTACCCTTGGGCTTTGTTCATTGACTTCGACAG	Zhou et al. 2014
Ahsnp840	[C/T]	AGCTCGAGTTCCTCTTTCTGGGCTTGGGTGTTTCCTACCTCGT[C/T]ATAGAATCTTACCCTTGGGCTTTGTTCATTGACTTCGACAG	Zhou et al. 2014
Ahsnp874	[T/C]	AGCTCGCGAGGAACTTCGTCCACAACCTGAAGGCCAGATTGAAGAAATCGAAAT[T/C]GGTGATGACCAGAATAAGACAACAAATGTC	Zhou et al. 2014
Ahsnp898	[C/T]	AGCTCGGAGCTTGTGAAGAACTTCATAAAGG[C/T]TTGGTGAATTTATTTGGAAATGTTGGAGCTTACTGGAAGTCCAAGTCCAATAA	Zhou et al. 2014
Ahsnp929	[T/A]	AGCTCGGCTGGTATATATATTATGGGAGCATGATTTTGGCAA[T/A]TTGTGCAAGTTTTCACCTTTTGATGACAATATTTCTGTAAGC	Zhou et al. 2014
Ahsnp1034	[C/T]	AGCTCTACCAATTCTAGTCATCAAAGTGAAATATGCATAGCTTGCATGAAGAACG[C/T]TCGCGAGAGCCGGGGACAAGTTATTGAGC	Zhou et al. 2014
Ahsnp1066	[C/T]	AGCTCTATTTACACATGCAACTGCGATGATGACAACGACGGTAGAGCCCCAGT[C/T]GGCGTACGTCATCCCCTCCTTTGCCCTTCCT	Zhou et al. 2014
Ahsnp1087	[A/G]	AGCTCTCCT[A/G]GGCCGAGGAGGATGATCCCGATTCCCCGAGTTCGTTTAGTCGATCCGCCTCAGACTAAAGTTGGTACATCTACTC	Zhou et al. 2014
Ahsnp1114	[C/T]	AGCTCTCTTTCATAGAATCATCATTCACATTATGATGCCTCAAAGTAGTTCATACTGCAGAGTAACTGTTT[C/T]TGATACTCTAGTC	Zhou et al. 2014
Ahsnp1136	[A/G]	AGCTCTGCGATGATGGGAGTAGATGC[A/G]ACGAGAGCGGCGGCGGAGGGATCTCGTGACGCAAGGGATGACAGAGAGAGATTGAGCG	Zhou et al. 2014
Ahsnp1152	[C/T]	AGCTCTGGTGCACGAAATCATAATCACACTTT[C/T]GCAATTCTGCACAACTAACCAGCAAGTGCCTGGGTCATCCAAGTAATACCTT	Zhou et al. 2014
Ahsnp1165	[G/A]	AGCTCTGTTGTAATTTGATGGATGATGAGCGGATAATTTATACGCTTTTTGACATTGTTTTTAGTATGTTTTTAGTA[G/A]GATCTAG	Zhou et al. 2014
Ahsnp1276	[G/T]	AGCTCTTTTTTTCGAAAGTGCAACTCCAGTGAGATGGTAGAA[G/T]CCTAGAAGGTGAGGATCTCCTTCTTTGTTTCTTGATATTGTA	Zhou et al. 2014
Ahsnp1292	[C/T]	TAAGTCACTTATGGT[C/T]CATCCAAGAGCTATTTTGTGGGTCTTCAGCACTTGAATCAATGCTTGTTCTTCCTGCGGTTCTAGAGTA	Zhou et al. 2014
Ahsnp1293	[G/A]	AGCTCCAAGG[G/A]ATCCCAATTTACAACCAAAGAAGAAGAAGGCAAGATAATCAAGGGGACAATAATTAGGCTAGTATTAGGATTTA	Zhou et al. 2014
Ahsnp1296	[C/T]	TAAAAATCGAAATTGAACTGGTGAACCGGTCGAAAATCAGT[C/T]TATTGAACCAAAGCGTGATTCGGCCGGTTTTTTGAATGAACAG	Zhou et al. 2014
Ahsnp1304	[C/T]	TAAGTAAATT[C/T]TGTTTCCGTTTCTCTTGCTTGGCTTATTCTTTTTATCACATGGTTGATGTTATATGTACTAACAATGTATTCGC	Zhou et al. 2014
Ahsnp1389	[C/T]	TAAATCAGCTCGG[C/T]GCAGTAGTCTTGACTCCAAGTCTATGCATGAAGTTCCCAACCATAGAAGTAATAGCTACAATAAAAGCAGA	Zhou et al. 2014
Ahsnp1408	[T/A]	TAA[T/A]ACATAAATTAGAGTAATAAAGCAACACTTAGTCCATCCTGCCTCAACCTCCAACACCATATATTGAAAACAACCCTCAGCG	Zhou et al. 2014
Ahsnp1445	[G/T]	TAAA[G/T]CTCGTCAGTCATCCTGTCCCAAACCCTACTCGGAATACCACAAACAAGGTTTAGACTTTCCGGATCGTAGGAATGCTG	Zhou et al. 2014
Ahsnp1453	[G/C]	TAATTCATACATAAATAGAATGCCGCACCT[G/C]TAAGGCAAGAATTGCTTATAGAGGATATGATTTCATACACGGCTGGAATACTGC	Zhou et al. 2014
Ahsnp1499	[C/T]	TAACTTATTATTTACTAAATTTCGGTTAGA[C/T]CGGGTATTACAACAAGTCTCAATTATCGAATTATATGTTGAGTTTGAATCATTG	Zhou et al. 2014
Ahsnp1530	[G/A]	TAAGGAAGTGCCCCTCTGAAATGTTTTCAGAACGGGTGCAGTTAGACATCTTCTAATATGGGCTCACA[G/A]AAAAAGCTCATATATC	Zhou et al. 2014
Ahsnp1570	[T/C]	TAATGAAACA[T/C]GTGCTGCGCATTTTCTGGGGGCTTTTGGCCCATTTTGGAAGGCTTGAAGGCGAAATTTGGATGCTATATGAAGA	Zhou et al. 2014
Ahsnp1794	[C/T]	CGCTCCAAATGATG[C/T]GCGTTCAAAGGCATTGAAAAGTAGAAATCCAGGGCTTTCCAACAATATATAATAGTATGGAGTGGACACT	Zhou et al. 2014
Ahsnp1855	[C/T]	TAAAGAGAGCTTCTGTTGAGTTCCTCAGGTCTATTGCACCTTCTATGTCGTTCGGTAGGTCAGGTACCGGACGGTT[C/T]GGATTGGT	Zhou et al. 2014
Ahsnp1886	[G/A]	TAAATTTAGTAACTTCTTCT[G/A]TAGGACTGAGTTCAGCAGTTACTGTTTTAGTCTCTTCTTTCAAGGAAGGTTCACTGCTCAGG	Zhou et al. 2014
Ahsnp1889	[T/G]	TAACAATTAGGCTAACCTAAACAAATTCAAACCCCA[T/G]CAAAGCTTCCAAATGCATATGATGTATGCCTGCCCTATGGCTAATG	Zhou et al. 2014
Ahsnp1967	[T/G]	TAATACTAGAGGTGAAAAGGGCCAATAATGTCAGAAGAAGAGGAAGAGGGCGTGGTAAA[T/G]ATGGCAAAGGTACTACTAGAGGAGC	Zhou et al. 2014
Ahsnp1988	[C/T]	TAATCCTGCTTGT[C/T]TGTGGGTCCTACGGGTATAGATGGTGGTTGGATCCCGCTTATCCGAGACGGGTTTGGCAATGTAACCGACG	Zhou et al. 2014
Ahsnp124	[C/T]	AGCTCCTGCACTTACAGCTCCAAATCCACACCTT[C/T]CTTGGGCTCGATGGCTCGACTGGTGGCAGAGCCCGATGACGGCTTGAATG	Zhou et al. 2014
Ahsnp129	[A/G]	AGCTCCCC[A/G]AGAACATAGACACCGTTGCAATAATGGTGATAAATGTAGTGGTTGGAAGAGATGTACCAGCTAAGTCAAAGTCAGC	Zhou et al. 2014
Ahsnp161	[G/A]	AGCTCAAAATTGTGAATATTGAAACTTGGAGGAAGC[G/A]GATTAGTTGAAGTTTTGAGGGCTGTATTCTTTAGGGAAATTGTCTTGG	Zhou et al. 2014
Ahsnp201	[C/A]	AGCTCAACCTACCCACTAAATATTCCCTCTGGACATCTTCTAAT[C/A]AATGCTTTATAGCTCTCCCAGGCTTCATATAATGACTTTC	Zhou et al. 2014
Ahsnp245	[T/C]	AGCTCAATGCCATCTTTTG[T/C]TGTAGCAACCTTTGGCTGCTGTTGAATATCAGATTAGAGATATAGGCTGTATAAAAGTTATTCTG	Zhou et al. 2014
Ahsnp278	[C/T]	AGCTCACATTTTCTGCGTTCTCGGAACAGTTGTATTTTCAAATAAGTTGA[C/T]CAATTCTTTGAACTCGAAGTTTTTGCCTCTACTT	Zhou et al. 2014
Ahsnp316	[G/A]	AGCTCACTCCCCCTTCTTCTTGCCTATTCCAAGTGTGTTTTTTATTCTAGAGCTAACTTGAATGAGGTTATAAAT[G/A]TTGAACTCA	Zhou et al. 2014
Ahsnp319	[C/A]	AGCTCACTGGCACGAAAACGCCAGTAAGGAGCATTTTTGGG[C/A]ATCAAACGCCAGAATGGGTACCATTCTGGGCGTTTGACGCCAG	Zhou et al. 2014
Ahsnp336	[C/T]	AGCTCAGATTAGGGAGGAAGCTCTAAAACAG[C/T]GGATGTCCCTAAGATACAACCAAAAGGGGTCAAAAGGAACTTCAGCGTCAACG	Zhou et al. 2014
Ahsnp352	[G/T]	AGCTCAGCCTGCGAAGCTAAGGCTA[G/T]CTAGAGGATATTTACATATATACATATAAACCCCAAGTCATAAGGAACTCAAAATAACC	Zhou et al. 2014
Ahsnp369	[A/G]	AGCTCAGTCGAAGGTTGCCATC[A/G]GGGTTGTTGCTCCACTTCCATCATTCTCCTTTTCACAGTAAATTGTGAGCGCTCTGAAGCTC	Zhou et al. 2014
Ahsnp378	[G/A]	AGCTCATAGAAAATGACACTCGTTTCCATCTGAAGAGGGGTA[G/A]GGAGATAGGGGGTAAGAACTGAGGAGTTCTTAGTAGGGTTGG	Zhou et al. 2014
Ahsnp455	[A/C]	AGCTCATTAGCCATAGGACAAGTATGCATCATATGCATATGTATGCCTTGCTTGAGTGTG[A/C]ATTGTTTTGGTTTGCCTAACTGTT	Zhou et al. 2014
Ahsnp478	[T/A]	AGCTCATTTGGAACTTTCACAGTGTCCGGCCATACTTATGACATAGGGTCAACAGAGTATTGATGAGCGGATAAT[T/A]TATACGCTT	Zhou et al. 2014
Ahsnp545	[A/C]	AGCTCCAGATTGAAAGTTACGGACGAAAGAACGTTGAAGTGAATAGTGTTTCCCAAACCCTTGCTCCCTCTCTTCT[A/C]TGAACGTT	Zhou et al. 2014
Ahsnp575	[C/A]	AGCTCCCAAAACTGGCATTCAACACCCAAGAAGGATCAAGCCCAACGTTGAACGCCCAAAG[C/A]TGGTGTTCAACGCCACCAAGGGA	Zhou et al. 2014
Ahsnp583	[G/A]	AGCTCCCACAGTTTACATAATAATGCATTTTGCACAAGCACGTAACAACTTTTTGATTTGTGTATTTG[G/A]ATAAAGGTTTCTCTAG	Zhou et al. 2014
Ahsnp590	[A/G]	AGCTCCCAGGAGAGCGTCCAAGCGAGCGCT[A/G]CCCTTGCTGCCCTGAGTGGTGTCGAAGGCGCTCTTTGAGTGAGCGCCCAAGAGA	Zhou et al. 2014
Ahsnp598	[A/C]	AGCTCCCCTATTGTATCAAAGTCACAAAATCTCAACACCAATGTACCCAAAAC[A/C]TGAATAAGAATTCAAAAATGGTTCAGGGTTC	Zhou et al. 2014
Ahsnp657	[C/A]	AGCTCCGATTGCCGCACCATTTGTGGCCACGTGTTTACCGCAGAGAGATCTACAAAACTCACTACTTTATTCTTGAGGTAAG[C/A]CA	Zhou et al. 2014
Ahsnp674	[G/A]	AGCTCCGGATCAAAAGTTATGGTGGATTGAACAAA[G/A]AGCAAGGGTTTGAACTTTGAGAGAGTTCTTCCCCCCTTTTCTTGCTGTG	Zhou et al. 2014
Ahsnp699	[T/A]	AGCTCCTATATACGTTCTAACGCACTTTT[T/A]TTTAGAGTAAAGTATCGTTTATGTTCCTAACGTTTGGGATAAGTCCTATTTGTGT	Zhou et al. 2014
Ahsnp701	[G/A]	AGCTCCTATCGTAGGGGTTGGAGTCGTCACCTTCG[G/A]CGAGAAGAGATGTAGCTTCTTGCTGCGATGGAGAGTGATCAGAACTGAT	Zhou et al. 2014
Ahsnp729	[T/C]	AGCTCCTCCCCTCAACCTAGGAGGTTTAGAGACTTATACTGATAGAAAATA[T/C]AATCATACCTCAACCAAACCAATCTCTTACGTA	Zhou et al. 2014
Ahsnp741	[A/C]	AGCTCCTCTAGTAGTACCTTTGCCAT[A/C]TTTACCACGCCCTCTTCCTCTTCTTCTGACATTATTGGCCCTTTTCACCTCTAGTATT	Zhou et al. 2014
Ahsnp764	[T/A]	AGCTCCTGCTGGACTGACATCACTGCA[T/A]TTTGCAGTCAAAGGGGGTCCACATAATCCTTTATTACCAACAAAGGAAGTGTTGGGA	Zhou et al. 2014
Ahsnp808	[C/T]	AGCTCGAATTGAGAGAGAAGAGAGATAAGGGTTTGGTGGCACTATTCACCTT[C/T]ATCTTCCAGGAGCCATAAGTTGAGTTACGGAG	Zhou et al. 2014
Ahsnp824	[G/A]	AGCTCGACGTCGGTTAGCCCCTGAGGGTGGTGAAGTGATTGTTATCGATTCATCAGTCTCATCTTATGGGC[G/A]AATTTGAACCGCC	Zhou et al. 2014
Ahsnp832	[G/A]	AGCTCGAGCAGGGGCACTATTCATACCCTAGGTTGGGCTCAAC[G/A]ACCCGGGATGTTCTACAGACAAAGCGACCGACCTCTTTATC	Zhou et al. 2014
Ahsnp850	[G/T]	AGCTCGATTGATTTTGATTATAGTTTGGAATATTTGGAAGGAGATGTGTCGGCAAGTCTTCGAGCATGTCCA[G/T]GAACCTCTGAAA	Zhou et al. 2014
Ahsnp856	[C/T]	AGCTCGCAAAGAACTTTGCCCTCAACCAGAAGGGGAAACCGAAGAAATTCAAATCGGAGATACTCGAGAGAAAA[C/T]AATAAGTATA	Zhou et al. 2014
Ahsnp880	[T/C]	AGCTCGCGTCGGGTCTGCCGCTCAGTTGAAAGCTATGAAACAAGTCTGCGGTGATTCTCGCTAAAGGAT[T/C]GGGTACTTTGATTGG	Zhou et al. 2014
Ahsnp883	[G/T]	AGCTCGCTAAATGGCTTCTTCTGTAATAGGGACTTACTTCTGACAGACATAGACGGACTGCAGGGTTG[G/T]CAAGTGGAAATTGGAG	Zhou et al. 2014
Ahsnp906	[G/C]	AGCTCGGCAACAGCTGCCCGCCAGGAAGCAGCCGCCCCGAAGAAGAAGAATAAGGAAATTGCTAAGGGG[G/C]CCCGGGAGGTCGTGA	Zhou et al. 2014
Ahsnp927	[C/A]	AGCTCGGCTCCTCATGACTCCTCTTTGG[C/A]AGCGTAGTCCCGAACCTCAAAGTAATGGCATTGATTCCTCCCTTGGGGTTGGGGAA	Zhou et al. 2014
Ahsnp928	[G/A]	AGCTCGGCTGAGGAAGTTATAGTAGTTTGAGTATAT[G/A]AATGAGGGTTAGGTTTTGCTTTTGTTCTTCTCCCTCCGTAAAATGTTT	Zhou et al. 2014
Ahsnp984	[C/A]	AGCTCGTGTGTGAGTATCTTCAGATCCCGGCTGT[C/A]GTGGAGGTCTTTTTGTACTTTTTCATGCTCACCGTTCTGATTCGGGAGGG	Zhou et al. 2014
Ahsnp1043	[G/A]	AGCTCTAGTGTGTATGG[G/A]CTTGTCGCGTTTGATTGAGGCTCTATGTTCTCTGATCAGGTAAATCAAGTCACCATTTATGGATGAG	Zhou et al. 2014
Ahsnp1085	[C/T]	AGCTCTCCTCAACCTTCGCTG[C/T]CACTGCCATCGTCGCTCGCCGGCTTCCGTTTCGCTGCCGCCACCGCTCGCTAGCCTCCATCAT	Zhou et al. 2014
Ahsnp1161	[T/C]	AGCTCTGTTCTGTGGTGGTAAGATTAGAGAGAAATGTTCGGATGTGCCGGAGATATTGT[T/C]AGCGTCAATGAGCCGGTGCCACTGG	Zhou et al. 2014
Ahsnp1167	[T/C]	AGCTCTTACTGTGATGTAGAGGAATTTTGATGCTGGGAACTTCATAGA[T/C]TCACAGCTCCTTCCCGGCACCGAGGACTACTTCCAT	Zhou et al. 2014
Ahsnp1182	[T/C]	AGCTCTTCAAGGCTGACACACACAAAGTGGCCAA[T/C]TCACTGGCGACACACACGAGTTGACCCATTCTACAAACGGATAAAAACTC	Zhou et al. 2014
Ahsnp1227	[G/A]	AGCTCTTGTAAGAAATGGTATGTTAGAAAAGAGTTACACTAGAAGCAAATGTCAC[G/A]ATCCAGGAATGCAAAAGAGATGGATAAAA	Zhou et al. 2014
Ahsnp1228	[T/C]	AGCTCTTGTAAGAAATGGTATGTTAGAAAAGAGTTACACTAGAAGCAAATGTCACGA[T/C]CCAGGAATGCAAAAGAGATGGATAAAA	Zhou et al. 2014
Ahsnp1232	[A/T]	AGCTCTTGTGATTCTCAAGAGAGCTATCTCGCTTGGGCGACAACTTGAAAAC[A/T]CTCCTCCTAAACTGCAATTTGCCTGGCTAATT	Zhou et al. 2014
Ahsnp1281	[C/T]	TAACAGGTCGGTTCGGTTGGACTAACGGCCCTGTTTGGATCCGGTTCAACCGATTTGGCCCATT[C/T]GGTCCAATCTTAGACCGATT	Zhou et al. 2014
Ahsnp1330	[G/T]	AGCTCTACAAA[G/T]CCCAGTGCATAATTTGGTAAAGAACTTCCATTTTTGTTCTCAGCTTCACCTTCCCCTAAATTTTCGAAATTAT	Zhou et al. 2014
Ahsnp1346	[G/T]	AGCTCTTCATTTATA[G/T]CTAGGAATTTTTGGTAAGAAATCTAAACTCAAGGTCCAATTTCTAGCCCTAAATATTTTGTATTTTTAC	Zhou et al. 2014
Ahsnp1370	[G/A]	TAAATCATAGATTTTGTGTGTGAATGATTGTGCGGGAATGCCTGTGTATATGGAATGGCATCTAGGAGAAAGGGGCACAT[G/A]CTTC	Zhou et al. 2014
Ahsnp1384	[C/A]	TAAAGCTCAAGGATCTTCCTCTGTAACCATGGAGAGGAAGCATGAAAAG[C/A]TTCTCTCACAGAGCCCCCACAATCAAACTCTAAGT	Zhou et al. 2014
Ahsnp1428	[C/A]	TAAACAACTCAGCACGCT[C/A]CTCCCTTCTTGGCACTCACTTCACAATGAAACTTAGCAAGAAGGGGGGAAAAAGCTCTCTCACAAA	Zhou et al. 2014
Ahsnp1433	[G/A]	TAAACCATGATTCTGAAAACCGGTTCGAACTG[G/A]CTGGTCGAATCGATTGAACCGTAAACCGTTGAGAAAAGCGGGTCGGGCAA	Zhou et al. 2014
Ahsnp1437	[G/T]	TAAAGAAGCTTGCAAAAAGGTGGAAGATGTCAAAGAAGA[G/T]CACAAGGGAGTGGAGCTTGCAAGTTCAAGGGGGTAAAATTCAT	Zhou et al. 2014
Ahsnp1448	[A/G]	TAAAGTATTTGACCCAAGATTGGGCCGAACCAGCCGAATTGGGTGAGCCAAGCCCGTATTGT[A/G]CCCAAAGCCCAGCCCAATGACA	Zhou et al. 2014
Ahsnp1464	[C/T]	TAACACTTAGGTCCTCCTCCTCCCTATACCATTGGTCTTCCGGATTAGGCTGATCCTCGCCCATG[C/T]CATCGCTATGAGTAGAC	Zhou et al. 2014
Ahsnp1540	[G/A]	TAA[G/A]TCATTTCCATATCAATCCTAAACCACAAATCACTCAATGTAGGTGTCTTTCGTCTTCTCTCTTCCGCCCCTCCTCCCGT	Zhou et al. 2014
Ahsnp1586	[G/A]	TAATGGTTTTGGCTCAAAATTGGGGCAAACGAGCTAAACC[G/A]GTTGAACTGGACCCAAGTCCCAACCAATTCACTCAACCCATATG	Zhou et al. 2014
Ahsnp1629	[A/C]	AGCTCTC[A/C]TTTTTACATATCAATTAGTGCTCTTCCAGTGGTAAGGAATGGCCTCCCCAAGATTATTGAGGCATTTGCATCCTTCT	Zhou et al. 2014
Ahsnp1656	[A/C]	AGCTCAAGGCCATCATTAGTCCTTCAAGAAGA[A/C]GATGCCACCATCCCTCAGGTGGACTCATTCCTTGTTCTTCTTTATAGGTTTT	Zhou et al. 2014
Ahsnp1753	[T/C]	AGCTCTCCGAATTTGACCTGAAATACGAAGCC[T/C]GGATGGCAATAAAAGCTCAATGCCTCATCGACTTCTAGAAGAATACGCCGGC	Zhou et al. 2014
Ahsnp1756	[C/T]	AGCTCTCTCATTGACCAGCCAGAGGATGTGAAGGAGCTGAGATTGGCTGGCATAATTA[C/T]CAATGAACTTGCCCGTGACAAAGAAA	Zhou et al. 2014
Ahsnp1782	[C/T]	AGTTCGGCCATGT[C/T]ACAGGAAAGCCCAAAGAAGGGCCCAAATAGAGGAGCACGCCCCAAATCCAAAGGCAGCCCAAGCCTACAGA	Zhou et al. 2014
Ahsnp1797	[G/A]	CGCTCGGGAAATCGGCTAAGGTATGGTCTCGGTTTCCCGTATCTAATATGTAAT[G/A]TGGTAGAAAATACTTAGGCTAGAGGCCCTA	Zhou et al. 2014
Ahsnp1869	[G/A]	TAAAGTTTGTACTGACTCCTAACACAAGGGAAGTTCTAGAAGAAGTACACAGTGGCATTTGTGGCAATCACCTCG[G/A]AGCGCAAGC	Zhou et al. 2014
Ahsnp1870	[G/A]	TAAATA[G/A]ATAACCTACTAATACTGTCAAACAAAGTAAAAATATACCCTAATCACTACGGGTCCAAATAATCATCGTCATCGTCCC	Zhou et al. 2014
Ahsnp1973	[C/T]	TAATAGTATCACAGATTTGCAAGAATT[C/T]AGCTAAGAACTGATGTGGATCTTCTGATGGAAGTCTATGAAACTTACAATTCTGCTG	Zhou et al. 2014
Ahsnp1987	[G/A]	TAATCCATAAGCCAAAACAAAAAGGTAAAGAAAAGATAAAAAAGC[G/A]AAGCTAAATTGGGAAAGTTGTATTATAAATTGTAAGCTG	Zhou et al. 2014
Ahsnp2000	[C/T]	TAATGAATAAAAAAAAATGAGTTCAA[C/T]ATTTATAACCTCATTCAAGTTAGCTCTAGAATAAAAAACACACTTGGAATAGGCAAGA	Zhou et al. 2014
Ahsnp2014	[A/G]	TAATGTTATTTATATGAAAAATGATCAGAGAAGCAATGAAGGA[A/G]TTTGCAAAGGAACTAGAGAAACTGGCAGAACTGCTTCTTGG	Zhou et al. 2014
Ahsnp2025	[A/C]	TAATTGAATAAATGTGGGTGAAAGGTGATAAAATCCCCTAAAAT[A/C]AATACAAGATAAACCCTACAAATGGGGTTTGTCAGCGTCC	Zhou et al. 2014
Ahsnp27	[G/A]	AGCTCTCTCTCTC[G/A]AAATACTTCTCCCACATCCTCTTCTGATGGTGTGTGCTAAAAGTGGGAAAGGTGGTAAGGTACTCTCTCTC	Zhou et al. 2014
Ahsnp32	[T/C]	AGCTCATGAATGGCAGAAGGAAATC[T/C]AATGAAATCTCTATGGTCTCATTATGAGCCTCAGATTCCCATGGTTTCCTCATTAGGGA	Zhou et al. 2014
Ahsnp72	[T/C]	AGCTCTACAAAACACATC[T/C]AATAAAATGGTAAAGAAATCACGAATCCCTTCTTAGACTTTCCTTCAAAAATTCGAAAATATAGTA	Zhou et al. 2014
Ahsnp83	[A/G]	AGCTCGAAATTGTTGGCACCAATGGCAGTTATGGATATGCTGCGCTCATAAAAGTCAGATGTGGGTGTAGTATATGAGCC[A/G]AAAA	Zhou et al. 2014
Ahsnp96	[A/G]	AGCTCAACGCACATGGCCCCAAACGGTGC[A/G]GCGATCAGAGATCTAGACCATGAGATATGTGGGATTGATTGGAGGGTTAGGGTTG	Zhou et al. 2014
Ahsnp145	[T/A]	AGCTC[T/A]AGTGGGAGCTGGAGCAGATTCAACGGATGCGAAGACAGATGGCGGTGTACTATGAGCAGGTACGCGCCAGTGACAGTGG	Zhou et al. 2014
Ahsnp146	[G/A]	AGCTCCTAGGTACC[G/A]AGCAACTTGCTCTTCCCTAGTGTTTCATCCTCATCAGAGGATGAGTATTTATCAAAACTCATGCACTACA	Zhou et al. 2014
Ahsnp150	[C/T]	AGCTCCGATTGA[C/T]GAGCCGTCAGCGGCCACGCGTTCATCTCGGAATTCTTTACAAAACCCACTAAACAATTTGGTAATAAATTTG	Zhou et al. 2014
Ahsnp152	[C/T]	AGCTCCCAG[C/T]AGCGTTGCTTGTGCTAGCTATTCCCGTCTGGGTATCAAGATGCTGAAGAGAAACCAACGGAAGAGACCAAACGAG	Zhou et al. 2014
Ahsnp169	[A/G]	AGCTCAAAGACCTGTGC[A/G]TGCGCACAGCCTCTTGTGTGTCCGCACAAAAGCCCAAGCAGAGCACGTGGATCATTTCGTGCGCGTC	Zhou et al. 2014
Ahsnp284	[G/T]	AGCTCACCCCCATGGATATGCACCGGTGTGTGTTATATGATTATGAATGTTTATAATTTGAGATATCGGG[G/T]ATGGAGACAGAGGG	Zhou et al. 2014
Ahsnp362	[G/T]	AGCTCAGGGGGCACTTAGAGGATTAGAGACTCTAGGGGATGTAGTATAGGATTGTTAGACACTTTCCCTTTCC[G/T]CAGTTTTACAT	Zhou et al. 2014
Ahsnp420	[A/G]	AGCTCATGACGACTAGCGATAAACT[A/G]GTTGGAGCTGCGGTGGTTCTTCCTTCCCTATCTTCACCTTCAGGAATGGAAAAGGAGGG	Zhou et al. 2014
Ahsnp460	[T/C]	AGCTCATTATC[T/C]GCACCAGGGCTAGATATGCATCATTCTTGTTCGTGCATTTACATTTGATTGTGTTTGCTTATTTTGTTTCTTT	Zhou et al. 2014
Ahsnp515	[G/A]	AGCTCCAAGTCTTTGGC[G/A]CATTTGTTGATGATCACAATTTCGTGCACCACAATTCCACAAGACTTCTTAGGTCTCCTCTTCGGTA	Zhou et al. 2014
Ahsnp523	[T/A]	AGCTCCAATTTTTTTCTCCACTATAGAC[T/A]ATTATACATCGTTGGAAAGCTCTGAATGTTAGATTTCCAACGCAACTAGAATCACC	Zhou et al. 2014
Ahsnp532	[T/C]	AGCTCCACCGAGAAGCCACACATCCTCCCAAAACTGAGTCTGTTGCC[T/C]ATCACACACCTCCATTGACAAGTCTGTGACCATCTTA	Zhou et al. 2014
Ahsnp539	[C/T]	AGCTCCACTGCGACTGCTGCCATGGCTGGCGCCCTTCCAGTTGCTG[C/T]AGTGGTTGTTACCGCGCCTTTGGTTGCCGGGAGGAGCG	Zhou et al. 2014
Ahsnp540	[A/G]	AGCTCCAGAAGCCCAATTGGTGAACTCTCAAATGCGTTGGAAAGTAGACATCCTGG[A/G]CTTTCCAGCAATATATAATAGTCCATAC	Zhou et al. 2014
Ahsnp562	[A/G]	AGCTCCATCAATACTCGAATCCAACTCGTAACTGAGAGATCGGATTC[A/G]AGTAGGAGCACTGTTCATATCCTAATCCAATACAATG	Zhou et al. 2014
Ahsnp568	[C/T]	AGCTCCATTCATAAGTTTCTAATTACCAACACCTATAATCGCATCCTCTTTATATAAGTTTTTATGATTTTT[C/T]TTTGGACAAACA	Zhou et al. 2014
Ahsnp603	[A/C]	AGCTCCCGACCTTGTAGACTAACCGAGTGGTACCCCC[A/C]ATTGTAGGTATGCCTCGCGTCGTCTCACGAGCTTCCACCGCTGCCGC	Zhou et al. 2014
Ahsnp624	[G/C]	AGCTCCCTCCTTGTGGTTCTGTTGCTTAGGGTTCTGCCAATTTTAGGTTTATCAATTTTTCTTTGCAGTTTCTATCTTCTT[G/C]TTG	Zhou et al. 2014
Ahsnp712	[C/A]	AGCTCCTCA[C/A]CCCCAACAATGGAGTTTAGAGGCTCATTGATGAGCGGATAATTTGTATACTTTTTGGCATTGTTTTTGGTATGTT	Zhou et al. 2014
Ahsnp718	[T/G]	AGCTCCTCAGAAATCGGTGGGATTCTACACA[T/G]CCACGCGAATGCGTCAGCTTTTGTGCACCAATCCTAGAACCATACTCCCACGC	Zhou et al. 2014
Ahsnp723	[T/C]	AGCTCCTCATGCTTTAGAGACAAGATGCGACTCACTGTATGTGGTATGACTGGTTTCTTAGTAAAGACAACTCTCATT[T/C]CAGGTG	Zhou et al. 2014
Ahsnp845	[C/G]	AGCTCGATGCACCACCACTGTGCGCCATTGCCATCAATA[C/G]GCTATCACAATTCCCAGTTTAGAAAGAGAATGTGATTTCACTATT	Zhou et al. 2014
Ahsnp882	[G/C]	AGCTCG[G/C]GTGGCGGGGCAGAGGCGGATTCCTTCTCTTCTCATTCCCTCTGTAAATGTGAGAGAATATAGATGACATTTTTGTAAT	Zhou et al. 2014
Ahsnp893	[G/A]	AGCTCGGACGGAGAAGTTACGGGAGTT[G/A]GAAGTTTACCGTAGGGGGTTCGGGAGTAGTCTCCTCCCTGGCGCTTTTCACGCTACT	Zhou et al. 2014
Ahsnp896	[C/T]	AGCTCGGACTT[C/T]GAAACTTATAGCTCGGTGTTGAGGGCGACAACTCGACATCGACTCTCAGAGACCGACTTATATCCAAGTTATT	Zhou et al. 2014
Ahsnp923	[T/G]	AGCTCGGCGTAATCAGCATTAGCAGATTTCAGCCTCTCTCTAAGCTCCATCATACCATAAGTCTGGATATAGCCCTCCTTTT[T/G]CT	Zhou et al. 2014
Ahsnp941	[C/T]	AGCTCGGGTGACCCGAGCTATGGCCCGGACCCAACCCGACCCGAAATAATGACCAGGTCTATTTTTGAGACCCTTACCCAAC[C/T]CT	Zhou et al. 2014
Ahsnp955	[C/T]	AGCTCGGTTTTTGAGGTCGAGTCTTTAGT[C/T]TTAGGACTTTGATCCTTCTCTAGTAAAGCCAAACTCAATCATTTTGTCGAGTTCT	Zhou et al. 2014
Ahsnp985	[G/A]	AGCTCGTGTTTAGGAGACCTCTCCTCTTCCTGCGGAGTTTTCAGAGGTTCTTCCATTTTCTCTGATTCCTCCAGATCA[G/A]GCTAAA	Zhou et al. 2014
Ahsnp1004	[C/T]	AGCTCTAAGTACTCATAATGGTCCTTGGGCTTATTT[C/T]TGGTGATAAGTCATCACCGGAGCGCTTACGTAGCGTCGTTTTGCCACG	Zhou et al. 2014
Ahsnp1024	[C/A]	AGCTCTACAAACCCATACAACCAATCTTGAGGTAAG[C/A]TATATTTTGCTCTTCGAAATTCCAGCCCTTGTTTTCGAGTTTCATGGG	Zhou et al. 2014
Ahsnp1038	[G/T]	AGCTCTAGAGTCTCTAATCCTCCACCCTCTACTCCTACTCATATTGCTCCCTCCTACTCA[G/T]CCCCCTAATAAATTGACACTGATG	Zhou et al. 2014
Ahsnp1049	[C/A]	AGCTCTATATTCTACA[C/A]TACTCATACTCCTAATACTATGAAAAACTATGTAAAAGTGCACTCCAATGTGTCCCTCTTTGATAAGT	Zhou et al. 2014
Ahsnp1071	[A/G]	AGCTCTCAGTCGCCGTTGTTGCGTCGCCAAACTTCTGCACCCGGTGTC[A/G]CACTGTGTCGCATTGAACGCAATGCTGAACGCCATA	Zhou et al. 2014
Ahsnp1092	[A/G]	AGCTCTCGGTTGGGATACGCACTATGG[A/G]CATACAGGACGGCCTATAAGACCCCGTTAGGGATGAGTCCCTTTCGAATTGTCTATG	Zhou et al. 2014
Ahsnp1095	[G/A]	AGCTCTCTATAAGCCCATAGTAGAAGATGTCTAATT[G/A]CACCCATTCTGAAAACATTTCAGAGGGGCATTTTCGTAGCATCTCTCT	Zhou et al. 2014
Ahsnp1131	[G/A]	AGCTCTGCAAGCTTATTTGCCTTGGTAGTTGAAG[G/A]GGGGAGCCGGCTAATGGAAACAGGGAATAAGAGGCCAATTTGACAAATCG	Zhou et al. 2014
Ahsnp1188	[T/C]	AGCTCTTCAGCCCCTCCCAACGTGGACCCGACTTCTAGTGCCGAAGAGATTCTTCTTACCCCTCCGACTT[T/C]TATAGCTGAACTGA	Zhou et al. 2014
Ahsnp1202	[C/T]	AGCTCTTCTACCCACTTCCAAGTCGAGTGCTAGTATCACGTTAGAAAGTCACGCAGGCTTCCACCCACACGTT[C/T]TCCGTGCGTGC	Zhou et al. 2014
Ahsnp1229	[G/A]	AGCTCTTGTAAGAAATGGTATGTTAGAAAAGAGTTACACTAGAAGCAAATGTCACGATCCA[G/A]GAATGCAAAAGAGATGGATAAAA	Zhou et al. 2014
Ahsnp1255	[C/A]	AGCTCTTTGGCACTCATTGTAGTTCTTCACCAATTCTCTTG[C/A]ATCTTTGAATATGGTAGGCTAGTAGAATCCACATTGCAGTACC	Zhou et al. 2014
Ahsnp1258	[A/G]	AGCTCTTTGT[A/G]CACTGTATAAGAGATTGCTCACCACCTCTAGTGGTGGTACCCTTTCTAAGAACAAAACGGCGGCAGAAGCATGG	Zhou et al. 2014
Ahsnp1283	[C/A]	AGCTCGAACACATAAAAC[C/A]AGTAAGATTTTGAGCCAATTTGATTGGTTGCATTTTATCAACCAATGTTTTATTTTGGTGTGTGGT	Zhou et al. 2014
Ahsnp1290	[C/T]	TAACCTACCCACCTCCAACAATCACACACACAGATCTCTCTCATCGTCAGGCCATCTCCGCCTCCCCAC[C/T]GCGACCCACTCCT	Zhou et al. 2014
Ahsnp1295	[T/A]	TAACAATCCTCCATCTTAGTTGAGCTTGTAGCTCACTGTCTGCTCC[T/A]CTAAGGAGCCTCCCAAGTAGTGTTTGAGTCTATGGCCA	Zhou et al. 2014
Ahsnp1309	[C/T]	TAACCTTGAGGGGCAATGAAGAA[C/T]AGGTGGTCCTGAATGGTTTTGAAGCTCTCAAGCACCCTAATGATTCTGAAGGGTGCATGAG	Zhou et al. 2014
Ahsnp1331	[G/A]	TAAAAACCCTAATTTAGGAGTTGATTGAAGAAAAAGGA[G/A]TGATGTCTTATGAAAGTTCAAGGTCCAAAGAGTTGACTTGAGATAA	Zhou et al. 2014
Ahsnp1336	[C/A]	TAAACAA[C/A]TTTTAGAGACTTATCTTGGCCTCATGACATTTTAGATCTAAAAATTGTACCTTTTGGAAGCATGAGTCTCTAAACTC	Zhou et al. 2014
Ahsnp1406	[T/C]	TAAAAACCACAAAAGTATCCTTCAGTACTTCCCCTGCCTCCAGTGTTGAGCCTCACCAATCAA[T/C]TGATATTCTGCATAATCCA	Zhou et al. 2014
Ahsnp1440	[A/G]	TAAAGA[A/G]GGTAAACAAAATTTTATACAGAAATCATGTACAAGTATTTGGTGGGCTGATTTAGTTTCAAATAATGTCCATCACTGA	Zhou et al. 2014
Ahsnp1475	[T/A]	TAACCTCAACGCTCCTAACTTCAATGCCATTGAG[T/A]TTATAGATCAACAAATTGGGCCATATGGTACCATTCCTATGGATGATG	Zhou et al. 2014
Ahsnp1489	[T/G]	TAACTATAGTACCTTTTCAAGTTACAAGCATGCCATGACCTTGGTAACTCTGTGCCGTTTAGGTTGGTAACCTTATAATA[T/G]CC	Zhou et al. 2014
Ahsnp1506	[C/T]	TAACTTTATCATGCCTCATTCAAATAAAATATAAGGAGAGGGGCACCAAATTGCTCTCA[C/T]CCAAGGATCGAACTTGGAGCTAA	Zhou et al. 2014
Ahsnp1508	[G/A]	TAACTTTCAGAACTGAACAAGTAAAAGACAATGCTGCAGAAAGAAGAAGGCCA[G/A]CGTTGGAGACGATAAGAGAAAAGAGATAAAA	Zhou et al. 2014
Ahsnp1560	[A/T]	TAATCC[A/T]CTTCTATTATCATTCAATGCCATGATGTGTTTGTTGAGTGAATTCAGAATCTATAGGGCAAGAATGGCATAGAAGA	Zhou et al. 2014
Ahsnp1727	[C/A]	AGCTCGGCTCCTCATGACTCCTCTTTGG[C/A]AGCGTAGTCCCGAACCTCAAAGTAATGGCATTGATTCCTCCCTTGGGGTTGGGCAA	Zhou et al. 2014
Ahsnp1854	[T/C]	TAAAGAATTATCCTCAAGAATTTGT[T/C]ATTAGGAATGTTTCTTACGGTGTCAAGACACGTTCCTCCACAAGAAAAGCAAATGAAGA	Zhou et al. 2014
Ahsnp1917	[G/T]	TAACTCCATTGGGTTTGACAATGTCACATATCTGCAGGAAATTTGTTTGGATCTTCATGTGGAAGTCCATGAAACTGGCA[G/T]CT	Zhou et al. 2014
Ahsnp2035	[T/C]	TAATTTCATACTTCACTATGGACTATTATATATCGTTGGAAAGTTTTGGATG[T/C]CAGCTTTCCAATGCAACTGAAAACACTCAAAT	Zhou et al. 2014
Ahsnp2054	[G/A]	TAGTTAGAAAGTGTCCCTTCGACATGCTTTCTGAATGGAGCATCATAGGTATTTTCTATGATGGTCTCTCT[G/A]AACTATCCAAGAT	Zhou et al. 2014
Ahsnp57	[C/T]	TAAGGAGGAAGCTA[C/T]GAGAAGAAATGCATGTCCCCGGTGAAAGAGGGGTTTCATAGACTTACTTTTGTTGTTGGATGAGTGACAT	Zhou et al. 2014
Ahsnp193	[A/G]	AGCTCAACATAATAATTGGGCGACAGCTTGAGTGCGTATCTCTT[A/G]GGCTCCTGGTACACGAGATTGACTGCTTCTCCTGACAATA	Zhou et al. 2014
Ahsnp216	[C/T]	AGCTCAAGCACTCCATAGGATCTTCAAGAGGAAGAAAGAGTCG[C/T]CATCACTAAGGTGGACCCGTTCTTTGAATTTTATGCTAATG	Zhou et al. 2014
Ahsnp231	[T/C]	AGCTCAAGTGGTTGAAAAATAAGTACAAGCCCTGCTAGAGGC[T/C]GAATTTATCTGGGAAGTCAAGTACCCGGCCTGGATGGCAAAT	Zhou et al. 2014
Ahsnp246	[T/C]	AGCTCAATGCCGCGGTCGCGTGGCCA[T/C]AAACGGTGTGTCAATCAGAGATCCGGATCAAAAGTTATGATAAATGGAAGTTTGGGGG	Zhou et al. 2014
Ahsnp285	[C/T]	AGCTCACCCCTGTGGATAAGCACCAGTGAGGGTGTTATATGTTTATGTTGAGAATTACTCGAGTAGGGGATGCGCAA[C/T]AGGGGGA	Zhou et al. 2014
Ahsnp323	[C/T]	AGCTCACTTTGGAGGGTCAGGTCAAGGTAGCTCAAGGTCGGTAGCCGGGTTAGAGAAAGAGCGTGACGAGGC[C/T]GCTTTATTGGCC	Zhou et al. 2014
Ahsnp347	[A/T]	AGCTCAGCCAAGTTACCAGCAAAGCCCAA[A/T]GAAGGGCCCTAACGGAGGACCGCGCACCAAAGCCCAAGACAACCCAAGCCTACAG	Zhou et al. 2014
Ahsnp376	[T/C]	AGCTCATACACTGCATCCACCCCTGACTTTTATGGGTGTAGTATAGCTGTATCTGCCTGTTCCGAGGGTTACCTAAAA[T/C]TGGAAG	Zhou et al. 2014
Ahsnp396	[T/G]	AGCTCATCATTTTCAACTTAGATGTCGAGGCTTTCTCCCACTTACAAGTCCCTTTGGAAGTCTCTA[T/G]GTATAGTATCTGCTCTTC	Zhou et al. 2014
Ahsnp422	[T/A]	AGCTCATGCCCAGTACTGATGAATTCTTTCATGATGGGGACCTTGGCAACGGCGCCATTTTGACGATCGGACTTCTGCCGG[T/A]AAA	Zhou et al. 2014
Ahsnp497	[A/C]	AGCTCCAAATGATGTGCTCTCAACGG[A/C]ATTGGAAAGTAGACATCCAGGGCTTTCCAAAATTTATAATAGTATGGGGGGGACAATA	Zhou et al. 2014
Ahsnp498	[C/T]	AGCTCCAAATGTAAAGCACATATATTACTAGATGTGGAGTGGA[C/T]TTGTTTTTCCGATGATGAAAATACTTATTTGGATGGTGATG	Zhou et al. 2014
Ahsnp542	[T/A]	AGCTCCAGAGTTATCTTGTAGGCAGCGTAAATGATGC[T/A]TATGAGAACCTGAAGGAGCAGGTTCGGGTTCTTGCACACGAGATCGA	Zhou et al. 2014
Ahsnp548	[T/G]	AGCTCCAGGCCCA[T/G]TCTGAGCAGAATTCTGGAGGGAAAAGACCCAAGGAACCAAGGAGGAAATTCACTCATTAGAGAATTTTTTG	Zhou et al. 2014
Ahsnp566	[C/T]	AGCTCCATGCCGCCGCCGCTGCCACCATAAAC[C/T]GCCACTGAAGCTTAGGATTGCTTGGTAAGCTCTAATTTTGTCTCAGATCTTC	Zhou et al. 2014
Ahsnp577	[T/C]	AGCTCCCAAAGTTGATTCTCCTCCTGTAATCCGGGATCCCACACTTTATTTT[T/C]ACACCCGTCTTCAAGTTGATCATCATAGTTCC	Zhou et al. 2014
Ahsnp595	[T/C]	AGCTCCCCCATTTTTGTTTCAGCTGTCACTTT[T/C]GCTACATGCATATTGCTGGCTGGAGAGTTGACTGCTGGGGTGTTTTCTGCTT	Zhou et al. 2014
Ahsnp623	[C/T]	AGCTCCCTCCCCCAATGAGAGGGAGTTTAGCTACT[C/T]ATAGCTTAGAGAGAGAGAGTACAAGAGACGGAAGAAGATGAAAGTAAAG	Zhou et al. 2014
Ahsnp650	[G/C]	AGCTCCGATGTCGTTTCGTCGTAGGATGAGGTCGTCGGGTACGAATTCTCTTCGGACGACGCTGTGATTGTACCTTA[G/C]ACTGATT	Zhou et al. 2014
Ahsnp711	[G/A]	AGCTCCTCACCCCCAACAATGGAGTTTAGAGACTCATGCCGTCAAAGTGTGTAATTCAGATCT[G/A]AAAATATCATGAGGCACCAGA	Zhou et al. 2014
Ahsnp719	[G/A]	AGCTCCTCAGGTCGTTGGGAAGGGCCAATTTCTTCTCAATGTTCAGCTTTGTCTTTCGATAGGTACGGAAGCACA[G/A]CTCGCAGTA	Zhou et al. 2014
Ahsnp787	[G/T]	AGCTCCTTGTGCGCGTGCGCGTGCATGGCCTGGATCAGATCTTTGGCATTTTGT[G/T]CTTCTCTCCACTTGCATGCTTCCTTCCTTG	Zhou et al. 2014
Ahsnp848	[C/T]	AGCTCGATTCTGATTCAAAGGCTGAAAAAGGACTGCTGATGCTGTTGGATTCTGACCTCC[C/T]TGCACTCGAAGTGGATTTTATGGA	Zhou et al. 2014
Ahsnp899	[G/T]	AGCTCGGAGGAGTTCGAGCTAAAGAGGAGTTATGACCATAGCCCGGGGAAAAGACTGAAGAGGTACAGGTCGGAAAGGAG[G/T]AAAG	Zhou et al. 2014
Ahsnp921	[T/C]	AGCTCGGCGAGAAAACAGGACGCCGTGGTGGTTGT[T/C]GTGGTCAACGCCGTCGCTGCTGTGGCTGTGGGATGCGGGGGCGATGGCG	Zhou et al. 2014
Ahsnp935	[T/C]	AGCTCGGGATGTCGGCTACTCCAGTTCCACCCTCGCGACTCGGTC[T/C]TAGGCCACACCTCACCTATCCACCCGAAGATACCTTCGA	Zhou et al. 2014
Ahsnp936	[G/A]	AGCTCGGGATGTCGGCTACTCCAGTTCCACCCTCGCGACTCGGTCTTAGGCCACACCTCACCTATCCACCCGAA[G/A]ATACCTTCGA	Zhou et al. 2014
Ahsnp938	[G/A]	AGCTCGGGGGGTAAAAGCTAAAGAGAGCTGCAGCCGCAACCGGGGGAAAAACTGAAGAGGTTCAAATC[G/A]GAAAAGAAGAAGGAAA	Zhou et al. 2014
Ahsnp953	[G/T]	AGCTCGGTGGAGTTCGAGGTCGGAAGGAACTTCGTCCACAACCTGAG[G/T]GCGAGATTGAAGAAATTCAGATCAGAGACACCCTAGA	Zhou et al. 2014
Ahsnp988	[C/T]	AGCTCGTTCTCTGCCTAGCAGGCAAGCCAGGCTGTAGCCACAGTTCTAGTCTGGGAAGATGAGAA[C/T]GGACAATAGCCTATCTACT	Zhou et al. 2014
Ahsnp1081	[G/A]	AGCTCTCCCTCTTCTGGTGCTGTTTTTTTTTCGGTGAACCCAACCGCC[G/A]TGATTTCGCAGTGGCTATACGAAGTGCCATTATTTC	Zhou et al. 2014
Ahsnp1129	[C/T]	AGCTCTGCAACAATAGCCACAAAGATAGGAGTATTCTGAGGTTGAGC[C/T]TGTGGTTGTTGTGGTTGAGAGGACTAGAACTGACAGT	Zhou et al. 2014
Ahsnp1154	[T/C]	AGCTCTGTAATTCGTACCAGAGTCGCACGCTAGTGGCACTAAACGCCGAGCCTGA[T/C]GTTTAGCGCCAGGAAGGCAGAAACGCCAC	Zhou et al. 2014
Ahsnp1179	[C/T]	AGCTCTTCAAATTTAGCTAAATAAAGTTGGTAATATTTTGAAATCAATGCTA[C/T]AGTTTCCAACCCTAACAAATTCGCAATTTTAC	Zhou et al. 2014
Ahsnp1197	[C/T]	AGCTCTTCCCGAGGAACGCGTGGC[C/T]GCAAACGGTGCGGCGATCGGAGATCCGTAGCTCAAATTATGAGCTTGGGAAGATGATCAT	Zhou et al. 2014
Ahsnp1260	[C/T]	AGCTCTTT[C/T]ATTTTTTTACTATATAACTTCCATATTTGTAATCCTTCTATAAAGGAATGGAGCCTTGAACTCGAAGAAGTTTTTT	Zhou et al. 2014
Ahsnp1261	[A/G]	AGCTCTTTTCAATCTCAACACCCACA[A/G]CATATCTCTCACCACACCCATATTATAAACAGCTATAAGACCTGCAAAACACAACAAA	Zhou et al. 2014
Ahsnp1267	[T/C]	AGCTCTTTTCTCTATTGAAAATTCTAAATCCACTCTAACCCGTCCCAGAACCCACAATCCCCTATGACAGATCTA[T/C]ATGGGTTTG	Zhou et al. 2014
Ahsnp1320	[C/T]	TAACCATTGTTGCTTAGTCCATCAATCTTTGTGGGATTGACCCTCACTCAC[C/T]TGAGGTATTACTTGGTACGACCTAATGCACT	Zhou et al. 2014
Ahsnp1368	[C/T]	TAAACCAAACGGATCATTTAGTTTGGGGCAGCTATTATCAAATGAGAAGGTTTGCTA[C/T]ATAGGTGGGAATGAGTTGGGCCTAATT	Zhou et al. 2014
Ahsnp1372	[G/A]	TAATGACTACACGATGCACGCTGGAGACAATGATGTCACTACCTTGAGAGGGTGACACTGTTGCACGCTC[G/A]ACTAGACGACGCAC	Zhou et al. 2014
Ahsnp1377	[A/G]	GCTCAGATCAGGGCTGAATAGTGGTGGAAGCACAGCAATACCGCAGTAGAAGCTCGACAAAA[A/G]CAGAGGCGTAAGTGCGGCAAAA	Zhou et al. 2014
Ahsnp1444	[C/T]	TAAAGCGGATT[C/T]TGGAGTGTCGGGTTCCTCCATAGGCGGGTTGGCACAACCAATGAGCTTCTTCAAGTATTCATAGCGGGGCT	Zhou et al. 2014
Ahsnp1463	[T/C]	TAACACACCGGGGGCGTGCTTCCTGCGATGTGGCGGCACTCCTTCAACACGC[T/C]AGGGGCGTGCTGACTCACCACGCAGGGGGCGG	Zhou et al. 2014
Ahsnp1497	[G/A]	TAACTGTTGTCAAAAATTTGTTTTTATTTTTCCTCTCCGTACATCCTTTAATTCGCAACCA[G/A]TACCTTTCTTACACCACCATGAG	Zhou et al. 2014
Ahsnp1500	[C/T]	TAACTTATTTCACTCCAACCCTACTAAGAACTCCTCAGTTCTTACCCCCTATCTCC[C/T]TACCCCTCTTCAGATGGAAACGAGTGTC	Zhou et al. 2014
Ahsnp1532	[T/C]	TAAGGATCCTGGGAGCTTTATGATACCATGCACAT[T/C]GGAGGGTACTTGTACCAAGACAGCTTTATGTGATCTTGGGGCAAGTATC	Zhou et al. 2014
Ahsnp1539	[G/A]	TAAGTATGTTGATTCTTGAACACAGCTACTTTTATGAGTCTTGGCCGTGGCCCTAAGCACTTTGTCATAGACACAT[G/A]ACTGGG	Zhou et al. 2014
Ahsnp1551	[G/A]	TAATATCGATTGTTTAGTGTATATAGGAACTACATGGCGCCTCGTGGACGCG[G/A]TCGAGGCCATGGGAGAGGCCGTACTAATACTC	Zhou et al. 2014
Ahsnp1740	[G/A]	AGCTCGTTATTTTGTACCTTTGACTCTTTGTTCCTATTTTTGGGTACTTTACACTTGACA[G/A]CTGGAGCGTTCTTACCACGCAAGT	Zhou et al. 2014
Ahsnp1810	[C/T]	GAACATAAAAACTAATGAAAACATTCCTACAAGTAGCTTGAACTTACTAAAAACTACCTAAAAA[C/T]AATGCCAAAAAGCGTATAAA	Zhou et al. 2014
Ahsnp1831	[T/C]	TAAAACTACTG[T/C]GGCAAGCTGATTCAGTGTTGTCCGACCTATCAGGGCATTGTAGGCTGAGCTTACATCGACTATGATGTAGTTT	Zhou et al. 2014
Ahsnp1832	[C/T]	TAAAAGAAAAAGGGCTCCATTTACTAATGCTAATACTAACAAGAAAACAAAAAAGTTGGAGGTG[C/T]TCAGAAATTGTCACACCAAA	Zhou et al. 2014
Ahsnp1942	[A/G]	TAAGGAGTGGAAGGCCCCTGAAGAATGACAAAAAAGATAACA[A/G]GAAGGCTGTGGAGAATGATATTGGCAGCAAGAAGCAAGTA	Zhou et al. 2014
Ahsnp1947	[G/T]	TAAGGTAGTCTTGGGCCATTATTGGATCACGAGGCCCAA[G/T]CATGTCCATCTGAACCGTTTTCTCTTGGGACATGTCATCGGTGCG	Zhou et al. 2014
Ahsnp1953	[A/C]	TAAGTGACCAAGACGTATATGCCACAAGTCAGAAGAGGAATCATCAGCTACATTCACATCTTCTTTGCACAACTTTGCTTG[A/C]AAC	Zhou et al. 2014
Ahsnp1961	[G/A]	TAATAAAAACAATTTCAATAACTGTCAGTTCTAGTCCTCTCAACCACAACAACCACA[G/A]GCTCAACCTCAGAATACTCCTATCTTT	Zhou et al. 2014
Ahsnp1962	[T/A]	TAATAACCTCTCCTTGGCTTTTTAGACTCCCCTTCACCTCTTCC[T/A]TGAATTTCTTCATGTCTTCAAATTCCTTGCCTAGTGTTTC	Zhou et al. 2014
Ahsnp2016	[A/G]	TAATGTTTTTGTATCTTTCCTATCAAAATAGACACAAAATATACTAATTCA[A/G]TGTCTCTAGACACAATGTCTCTATACATGTTTG	Zhou et al. 2014
Ahsnp2032	[C/T]	TAATTGTCTTGTCTACTATCTCTAATGAGATGTTTGCAACTTGTACCTCAAGGATTCCCAGCTTCTCTATTACAG[C/T]GAGTGGCAT	Zhou et al. 2014
Ahsnp2040	[C/A]	TAATTTTTACTTACCTTTACTTCTTTTTG[C/A]ACTCTTCTTTTTGTACTTTTCACTTTTGATTCTTTTCTGAAAGTCATGAGTGGCT	Zhou et al. 2014
Ahsnp2044	[G/T]	TACGGCATTGTAGGCTGAGCTTACGTTGACCACAATGTA[G/T]TCTATCTTGAGTGTTCTGGATTGGTTCCCTTTTCCGAAGGTTGTA	Zhou et al. 2014
Ahsnp16	[G/T]	AGCTCATGACAAGGAAAACAAACTAGAGAGAAAAGGAAATTGTAGTACTCACTGAGGAATGTAGT[G/T]CCATCATACAGAAAAAGCT	Zhou et al. 2014
Ahsnp137	[G/A]	AGCTCGACCCAAAGACGGGAGAG[G/A]TCTTCAAAAAGGTATTCCCCTTTTTGATGCTATTAGCCAGGTGCCTAAATATGCGAAGTTT	Zhou et al. 2014
Ahsnp165	[C/T]	AGCTCAAA[C/T]GTGATCTCCTCCAAGGCTTTCTTTGGCCAAGGTTTGACCTCACATTTGAGACAAACATTGGCACAAATGTGGCTCC	Zhou et al. 2014
Ahsnp199	[A/G]	AGCTCAACCCTTGCATCTTACCCGGAGTCTCAAACTCTTATCT[A/G]GAGCAAGTGGATAACACTACAGAATCTTACCCGACTTATTG	Zhou et al. 2014
Ahsnp203	[C/T]	AGCTCAACCTCTATGAATCAAATAACA[C/T]ATATATATATATATATATATATGAACATAACATACATACACTTGCATTATTGTCTAG	Zhou et al. 2014
Ahsnp207	[G/A]	AGCTCAACGCGGTGGTCATGTGGTCACAAACGGTGCG[G/A]TGATCGAAGCTCGGACGGAGGAGTTACGGCGTTTTGAAATGACCATA	Zhou et al. 2014
Ahsnp257	[A/G]	AGCTCAATTCCATATATTTTGTTAGGTGCAACACCCTCAGATAGTTGAACTTGTCGGAGGTCCATTCTATC[A/G]ATGCTTCTTGTTG	Zhou et al. 2014
Ahsnp300	[G/A]	AGCTCACGGTGGTTGGGTTCGCCGGAAAAAGCACCGGAGGAGAGAACTCACTGGTGGTGAAGAAGGAAA[G/A]GAGAAAGGAAAGAGA	Zhou et al. 2014
Ahsnp307	[T/C]	AGCTCACGTGTCGATTATTTTGC[T/C]AGAACCCGACACATTTGGTAGCTAACCCAGACATTGGTCTCTAGGTTGCGCATCTCTCCAA	Zhou et al. 2014
Ahsnp317	[C/T]	AGCTCACTCTATGGTTGA[C/T]TCCAATTCGAATGAATGTCTGTGCTAGAAGCAGCTGATTTAGCCATACAATCTGCAACACTATTTA	Zhou et al. 2014
Ahsnp329	[T/C]	AGCTCAGAGCGCCGCCGTGAGCACCGCTGTTGGCAGCACTTCCGTGCTATTTCCC[T/C]TGTCCATTTTTCCCTTCCTACATTTATAC	Zhou et al. 2014
Ahsnp349	[A/G]	AGCTCAGCCCCTATCTTAGCTTCTGGTGCCGGTTCTGCCTCAGCCACCGCTGGGCT[A/G]ACCTTGTGCTGCATTCCATTCCCTTCTA	Zhou et al. 2014
Ahsnp379	[T/C]	AGCTCATAGGAAACGGCCTGTCTTGTACATAAAC[T/C]GATGTTCCTAAATAATCAAATAAGTGAGTTGACTCCAGACCTAAAATTGT	Zhou et al. 2014
Ahsnp403	[G/A]	AGCTCATCGCAGGCGCGATGCTCTTCTCCCTCTTCAGTCAGACA[G/A]CGACGCGATGGTGGTGGTGCAGCCCAGTACACCGGCGCGA	Zhou et al. 2014
Ahsnp407	[T/G]	AGCTCATCGGGGTT[T/G]CTCGAAGGTTGCCGCCATGTTTGTGGCCACTGAAAATGGTGTTGTGGTTGCCAGAGTCACTGCCAGAGCT	Zhou et al. 2014
Ahsnp421	[C/T]	AGCTCATGATCTGCAACAGGAGGGGTCGGAGCGGTCTCTT[C/T]GGCAGCGAAAGTCGGAGCTTCTGAAGAACTCGGCAGGAATCCTT	Zhou et al. 2014
Ahsnp432	[A/G]	AGCTCATGGATATAAATTGGGAAGAAGACAATAACGACAGT[A/G]AAAGCCAACTACGAAAATGATAACGGAGATGAGTCAGCCAATC	Zhou et al. 2014
Ahsnp519	[G/A]	AGCTCCAATCCGCAATGGATTAGTCCTTGACCT[G/A]TCGGATTGGAAGATACCGTAGACAACCAAAAAAAAAAAAACCAGGTTGTAC	Zhou et al. 2014
Ahsnp561	[G/A]	AGCTCCATATTTTAGCAATAAGAATTTATTATGTGGTACAACATATCGATTATCCAATGG[G/A]ATGCCAAATACCTCAATTGTGCGA	Zhou et al. 2014
Ahsnp579	[A/T]	AGCTCCCAAGATCGTGGCACGCATGCAATTTGAAGAGATATTAC[A/T]GCTAGAAGTGTACCTTGCTACTTCATGTACTCTTTTTCCC	Zhou et al. 2014
Ahsnp619	[A/G]	AGCTCCCT[A/G]TCACCGTGAGTTCACCCTGTGTACTCTTTTCAAGTTCAGCAGAAGCAATAGGGTTTGGGTGCTCATCTAAATATTT	Zhou et al. 2014
Ahsnp620	[A/G]	AGCTCCCTATCACCGTGAGTTCACCCTGTGTACTCTTTTCAAGTTCAGCAGAAGCAATAGGGTTTGGGTGCTC[A/G]TCTAAATATTT	Zhou et al. 2014
Ahsnp642	[C/T]	AGCTCCGATCGACGA[C/T]CCGTTTGCGGCTATGTGTCGCCCTCACTGATTTCGTGTTTTGGGTAGAGTGGGTATTGAAAATTGTGAT	Zhou et al. 2014
Ahsnp644	[T/C]	AGCTCCGATCGCCACA[T/C]CGTTTGTGGCTACGCGTCCAGCGCGTCAAGCTTTACAATTCTAACGGAACAATTTATTTGGTAAGTCA	Zhou et al. 2014
Ahsnp656	[C/T]	AGCTCCGATTGA[C/T]GAGCCGTTTGTGGCCACGCGTTTATTTTGGAGTCCTCTTTATTTATATCCAAACAAAGTGGTAAGAATATTT	Zhou et al. 2014
Ahsnp679	[A/G]	AGCTCCGGCTCTGATACCATCTGTAGCAGCCCA[A/G]ATCATCCGCTAGCATGATATTGTCCGTTTTGGCACACAAGGCCTCACGGTT	Zhou et al. 2014
Ahsnp763	[G/A]	AGCTCCTGCATCACTAGGAAAAGTTATATAGTGAAACTAAAAAGGG[G/A]AAAATATGAGAATCAGGTAGCAGTAAAAGAAAGCTTAG	Zhou et al. 2014
Ahsnp797	[T/C]	AGCTCGAACACACAAAACCAGAGATTTTGAGCTTGATTGATTGGTTGTATATCAACCAATATTCTGTTTTA[T/C]TGTGTGTGTTGTT	Zhou et al. 2014
Ahsnp825	[G/A]	AGCTCGACTAGTTTTGATTATA[G/A]CTTGAAATATTTAGAAAGAGATGTGTCGATGAGTTTTCGAGCATATTCAGGAGTCTCTAAAA	Zhou et al. 2014
Ahsnp851	[T/C]	AGCTCGATTGTGTGGAACTTTCCTC[T/C]TTCGCTTCGGAGGTTTATACTTTCGTTATAACAGCGACGCGCCATCTTTTGATCTGCTT	Zhou et al. 2014
Ahsnp915	[C/T]	AGCTCGGCCAAATTGCTATAAGGGCCAAAGTAGGCCCAAAGCAGAAGAT[C/T]GTATCACAGCCCACCTAAAGGTGGCTGACCAAAGA	Zhou et al. 2014
Ahsnp946	[G/A]	AGCTCGGTCGCCGGGACCTGGCGCGACTTCCATTCAGGCAAAG[G/A]GGTTGTCCCCACAGACGGCGCCAATGTTGGTTCGTCGGGGT	Zhou et al. 2014
Ahsnp957	[C/T]	AGCTCGTACAGAGGAGAAACGTGGATTGGAAGTTGACGTAAGGGTTAGGGGAATTTT[C/T]GTTTCGCCTTCCCCTGTTGGCTTTCAG	Zhou et al. 2014
Ahsnp975	[T/C]	AGCTCGTGATATCTCAGTAATGT[T/C]TGCACCACTAGATCCATGTGTATAACGAGCAAGAGCCGAAAGATCGACATCCTTCGAGATT	Zhou et al. 2014
Ahsnp981	[G/A]	AGCTCGTGGTAGAAACGAGTGCTTGGTCAGGGCACAGCCTGAGCCGAATTCAAGGCCCACTGGTG[G/A]ATACTTGGATTGGTGGCTA	Zhou et al. 2014
Ahsnp1002	[A/G]	AGCTCTAACAACGCTACACGCAGTTGTAACCCCACCTCCTCCTCCTCTGCGTATT[A/G]GTAAGAAATGTCTAAACTTTACTATAGGA	Zhou et al. 2014
Ahsnp1019	[A/T]	AGCTCTACAAAACTCATAAAATAAATC[A/T]TGAGGTAAGTCACGTTTTTCTCTTCAAATTTCCAGCCTTGATTTCGAGTTTCATGAG	Zhou et al. 2014
Ahsnp1052	[G/A]	AGCTCTATCATCGTCATCGAGTTTCTAGTGTTGAGAGGATCT[G/A]CTCTTCTCCCTCTCTCGATCTGATATGTCTCATAAAAATATA	Zhou et al. 2014
Ahsnp1090	[G/T]	AGCTCTCGACTA[G/T]TGTGGAGGTCTTCTTATGGTTCTTTCTATGCACCTTTCTGACCAAGGAGGGAAAACACAAAATGGGTTATGT	Zhou et al. 2014
Ahsnp1106	[A/G]	AGCTCTCTGAC[A/G]CCATGGCTGCACTGGAACCCAAACCATAGCACACGCTTTCTGATTCTGGTTTGGGGGTGAGGTTTTTGATTAG	Zhou et al. 2014
Ahsnp1139	[A/C]	AGCTCTGCTCAGAATGCTCTGTCTGTTGCTGAGAAGATGATGGAAAAGG[A/C]TTTATTGCTAAGCCTGTTTCTTCCACCATTATTAT	Zhou et al. 2014
Ahsnp1164	[T/C]	AGCTCTGTTGGGCCGAGGAGGATGATCC[T/C]GACTCCCCGGGTTCGTTTGGTCGATCCATCACAGACTTCAGTTGGTACCTCCTCTC	Zhou et al. 2014
Ahsnp1166	[A/C]	AGCTCTGTTGTTTCGCCGTC[A/C]TCTTCTCTAACCCTCTTCGTGGTATTATTTTCTGCTTCTACATGCTTTGGGCTTTTTTTGGTCC	Zhou et al. 2014
Ahsnp1170	[G/C]	AGCTCTTATCTATTTAGTTTATTTAGTTTTTCATCTTTATTGGTCCTGTTTATTAGAACATATGTATAGGGCTT[G/C]AACATTATTT	Zhou et al. 2014
Ahsnp1191	[A/G]	AGCTCTTCATGAGATTGAATGTGAGAAGAGACACTTATGCAGAAAATTTTGCTCAAG[A/G]CTTAGAGGATGATGATGTTGAAAATGG	Zhou et al. 2014
Ahsnp1208	[A/G]	AGCTCTTGAAACTCTTGTGAAATTATGTTTATGTTGAGCCCTAG[A/G]TTGATTTGTGGTAGTTTATGTATATATAGCTTGATTATAG	Zhou et al. 2014
Ahsnp1212	[G/A]	AGCTCTTGACCTGTCTAGCAAAAGCGCCG[G/A]AAGCTCGGACCAGAAAGGACATAGGTCATGGAAGAGCAAGTACAAGCCTTGCTGG	Zhou et al. 2014
Ahsnp1214	[T/C]	AGCTCTTGCAGCGTCGTAACACTGATGGAATCCGTCATGGCCAAGATGGATCCTGAGATGACCAGTGCTTGGAC[T/C]ATCGCAGGAT	Zhou et al. 2014
Ahsnp1233	[C/T]	AGCTCTTGTGATTCTTGAAAGAGCTATCTTGCTTGAGTTA[C/T]AACTTGAAAACACTTCTCCCAAACTGCGAATTTCCTAGACTAAT	Zhou et al. 2014
Ahsnp1251	[C/A]	AGCTCTTTGAGAGGAGATCAGTAACGAGCCAACCTTATAAGAGGTCGGTCGTTTTTGTCTTCGTCCAACCCGGTCCTTATAG[C/A]TC	Zhou et al. 2014
Ahsnp1254	[A/G]	AGCTCTTTGCCATCGTTTTGCTCGCTAGAAT[A/G]TCGTCACTGGAGCTATTCCATTCTCTCATTATTTTTTGGTAGAGTGAGTAACT	Zhou et al. 2014
Ahsnp1270	[T/C]	AGCTCTTTTGGTGTGCATTCTTTACACTTGTATTCAATTTTCGTATTTTAGTATAGTGTTTCCTTGTT[T/C]TGTACAGTTTTTTTTT	Zhou et al. 2014
Ahsnp1328	[C/A]	TAAAGAAGAGGCACAACCTACCATGCCCTTGGTGAG[C/A]AATGAAGAAGAGATTGAATCGGAAGCAAGCTACCAAGAGGAAGAGGTT	Zhou et al. 2014
Ahsnp1332	[C/G]	TAATCCCCTCCTCAGTCAGCTTCACGACCTCCCGGG[C/G]CCCCTTAGCAATTTCCTTATTCTTCTTCTTCGGGGCGGCTGCTTCCTG	Zhou et al. 2014
Ahsnp1345	[A/G]	TAATCCTAGCTCCCAGATCACAAAATGCTTTTTCAATGCTAATATCCCCTATGATGCAGGGGATTTGAAAGCTCCCA[A/G]GATCTTT	Zhou et al. 2014
Ahsnp1348	[T/C]	TAAACTATGAATTTGGGCTGGAGAC[T/C]GTGAATTTTAGGTCGGAGGCCGGAAAGAGGTAAGGGAGGTAAGTTGATATGTGTATTGT	Zhou et al. 2014
Ahsnp1365	[C/T]	TAATCCTAGGGAGGAAGACCTCCCGGGACGTTCAGTGACCAATAAGGAGTATCCCTTTGAGGAACCAAAGGAAT[C/T]TGAGGCTCAT	Zhou et al. 2014
Ahsnp1376	[A/G]	TAATGCTCAGCGCGAAGAACGAAGCGACGAACATTGAACGCCTCAACATACCAAGAGACACGCGCACAA[A/G]AGACGCGCCTCTCCC	Zhou et al. 2014
Ahsnp1387	[T/C]	TAA[T/C]CGGGTTTTACAGGACGGGTCACAAGTGGAATAGCAACAACAGTTCCATCTGGATGATTTAGGATCTGAACATCCGGGTCCA	Zhou et al. 2014
Ahsnp1441	[T/C]	TAAAGATCATGGTGCCTATGATGCAAGGTATTAGGAACTTTTCGGGATC[T/C]GGTTTCTTCTGAGGTAATTACTGTTGAACCAAG	Zhou et al. 2014
Ahsnp1459	[T/C]	TAAA[T/C]TGGGTGTAAGATTCATATCGCGGAACTGGCTTGAAGCTCTTCTTGTTGTCACGTGGCTTTTCATCATCATTTTCGGCC	Zhou et al. 2014
Ahsnp1538	[G/A]	TAAGGTTTCCCCGACATTGGTCGTCTTATCCTGGGCATCGCCGATTTAGACCTCTTCCATCTC[G/A]CCTTCAGGTTGTGGGCGAA	Zhou et al. 2014
Ahsnp1557	[T/G]	TAATCATCCTAACCTTTCTTGGAAGGATCAACAGAAGCCTCAGCAAGGTTTCAACAA[T/G]AATCAAGGTGGAAGAACCCAGAATA	Zhou et al. 2014
Ahsnp1567	[C/T]	TAATCTCTTACAGCAAAGAAAAAGAGTAGCAGTCTGTAAACATCCTGATCTACTTCCTCAATGTGTA[C/T]TGTGTCAGTAATTTGTA	Zhou et al. 2014
Ahsnp1572	[C/T]	TAATGAACTGTCGAACCGGCTGAGAATCGGCAGTTGAACCGAACCAAAA[C/T]CCGTCGGTTTTCTAAAATCTTCACCAAATCGCGCC	Zhou et al. 2014
Ahsnp1733	[T/C]	AGCTCGTAGCCTGCATAGGGCTAGACATGCATCATCCTTGATTGCGCATCTA[T/C]ATTTGATTGTGTTTGCTTATTTTATTTCCATG	Zhou et al. 2014
Ahsnp1736	[A/G]	AGCTCGTCGGCCC[A/G]TGCGCCTTTCTTGCTGTCTAAGCGTTTCTTGAGGCATAGCAGGAGGACTTTGTTTGCGGAGTTCAGTTGTC	Zhou et al. 2014
Ahsnp1737	[G/A]	AGCTCGTCGGCCCATGCGCCTTTCTTGCTGTCTAAGC[G/A]TTTCTTGAGGCATAGCAGGAGGACTTTGTTTGCGGAGTTCAGTTGTC	Zhou et al. 2014
Ahsnp1757	[C/T]	AGCTCTCTCTCCCTCTGGTTCTGATTTCCAACAATGACGATGCAGCTCTGAGCCTCGCCCGCGCCACTCCCCCTTTTCCT[C/T]TTCA	Zhou et al. 2014
Ahsnp1766	[G/A]	AGCTCTGGCTGGACGTCTAACGCCCCAAATGGGTAGCATTGCTAGC[G/A]TTGAACGCCAGCCAGGGAGCAGACCCTTGGTGTTCACA	Zhou et al. 2014
Ahsnp1785	[T/C]	CAAGCAGCTTCAAAAAGATTCTTAGGCTCCCGGGGGGTTAGATGTCAGAA[T/C]AGATTCCAGGATCCCAAACCTTGCTTTTACAC	Zhou et al. 2014
Ahsnp1818	[C/T]	GAATCCTGCAATCAGGGCTTCATATTATG[C/T]CTGATTGTTAGAAGCTGGAAATTCAAATTTGAGGAAAACCTCTATCTGCGTTCCC	Zhou et al. 2014
Ahsnp1835	[C/A]	TAAAAGCTAAATCCA[C/A]CTAAAGATGTTCTATTTGAAAAGTGTGATATGTATTGCTGGAGCTAAATGCCAAATTCGGCGTTTACCG	Zhou et al. 2014
Ahsnp1850	[A/G]	TAAACTCTTATCCTCTTGTTGTGAATCCTTGGTTGTGCTCCCTGCGGTGGGATTCCC[A/G]GTGGTCATAATCTGCCTCAGCAGNNNT	Zhou et al. 2014
Ahsnp1971	[A/T]	TAATAGCTAGAGATAGCTACACC[A/T]GTATAGCAAGGTTGCTTACAGGGGTTGTGCCAACTGGAAAGCCATGTCTGGAACTAGTACT	Zhou et al. 2014
Ahsnp1977	[G/A]	TAATATATTTTCAGCCAACAACGATAATCCATTCACAGAATACAAATAAACAACCAAATCAAAAAGCGCGC[G/A]CACACACACACTC	Zhou et al. 2014
Ahsnp1983	[G/A]	TAATCACCCGAAATTTTGGAGAGAAGAACTGGGAAAATTTC[G/A]AGCTTACGTTACCAGTTTCACATATGGGTTTTGTAGAGCTA	Zhou et al. 2014
Ahsnp2056	[C/T]	TATCGTCATCATGCATGGAACCACAAACGAAAACGGATTTTGTGACACAAACCTCACTCC[C/T]TCATGAGTATTACGAATTATCT	Zhou et al. 2014
Ahsnp9	[A/G]	AGCTCT[A/G]AAAAGTTAGTCAATAGAAGTCAGTTCATTACACATTTTTGTCGATGACTTGCCCCCAGATGAATTCCATAGATTTTTC	Zhou et al. 2014
Ahsnp10	[T/C]	AGCTCTAAAAAGTTAGTCAATAGAAGTCAG[T/C]TCATTACACATTTTTGTCGATGACTTGCCCCCAGATGAATTCCATAGATTTTTC	Zhou et al. 2014
Ahsnp14	[A/T]	TAACTACTCGCAACGAAAATGTTGGTCCAACAGTCCAAAATTATAGC[A/T]CTTACTCTCTCAAGGGACTGTCAAATGATTATTGTTG	Zhou et al. 2014
Ahsnp63	[G/A]	TAAGAAAGCAAAATGGAAGATCAAAGCTTGCTATAAAATGCTACAATTGAAATGAAAATGCAAACTACATAAACCCTA[G/A]GAGAGC	Zhou et al. 2014
Ahsnp88	[A/G]	AGCTCTATCTACACAACTGCAAGAAT[A/G]TCCTCGAAACCATGTGAACCTACGATTTGTGAGTGGCAAATTTACTAAATGCATATCT	Zhou et al. 2014
Ahsnp97	[T/C]	AGCTAACCAAAAAATCTTAGGGAAGGTC[T/C]CACTTGTCCGCCACGTCAGCAGGCACGTCAGCGAACAATGACGCGTGACGGCACCT	Zhou et al. 2014
Ahsnp111	[A/T]	T[A/T]AAATGACTAAAAACACAACCTTATCCAAGAATGCTGAACTTGTTTATCCGTTGGTCGGTGTAACGTTTTATTCTGAATGAC	Zhou et al. 2014
Ahsnp120	[A/G]	AGCTCCACTCTATCTCGACCAACCACCAAAGGGGAGATAC[A/G]GCCATTTCTGACTGCCTCGCCAATCATTCTATGTAGTACATCCA	Zhou et al. 2014
Ahsnp123	[A/G]	AGCTCTTCCCAGATGAGCAACTGATGACGGTTCACAAAGCACCATGGTTTGCAAACATTGCCAACTTCAAGGTAACTG[A/G]GGCTTT	Zhou et al. 2014
Ahsnp131	[G/A]	AGCTCCTGCGTCAGATG[G/A]AGAACGCTCACGCGAAAGGTGAACGCAAAAATGCCGAACAAAACAAATACAAAGAAAACGCAACTAA	Zhou et al. 2014
Ahsnp132	[C/T]	AGCTCGGGGATATAGATTGGGAAGAAGATAACAATAATAATGAAGAGTAGTT[C/T]GAAGCCAACTATGAAGTCAATAAAAAAAATGA	Zhou et al. 2014
Ahsnp155	[G/A]	AGCTCAAAACGGCAACAAAAATGCTGACCTAAAGG[G/A]GTGGAGAGTGAGCTGTCCGTTTTATTTGATGATGTGGATAGAGAACAAA	Zhou et al. 2014
Ahsnp163	[T/C]	AGCTCAAACCAATATAAAGATGGGAGTCCACTTCCCTTA[T/C]CGAAGGTTTTCATCCGAAAGTTTTGCCAAGCACCTTCTCTTACCG	Zhou et al. 2014
Ahsnp172	[A/G]	AGCTCAAAGCCACTGCTTCCGCGTCCGGTTCCGTCGCTGC[A/G]TGGCTGCTATCATCATCTTCACTTGAGAATTGTGGTACAGCTGC	Zhou et al. 2014
Ahsnp253	[T/C]	AGCTCAATGGTGT[T/C]GCTTGATTTATGTAGCCAACCCCATCTAGTCGGATAAAGCTTTGTTGTTGTTGTTGTCCTTGTTGTTGTAT	Zhou et al. 2014
Ahsnp276	[A/T]	AGCTCACATGCATGCAGTCGTGCGTATGCATTCCCTACAGTGTGTACGCATCTTTGCGCAAA[A/T]ATTTCATCGTGCGTACGCACGA	Zhou et al. 2014
Ahsnp279	[C/T]	AGCTCACCAAAAAATCTTAGGGAGGGTCCCACTTGTCTGCCACGT[C/T]AGAGCCACGTCAGCAGCCACATCAGCGCCACGTCAGGGC	Zhou et al. 2014
Ahsnp332	[A/G]	AGCTCAGATCAGGGCTGAATAGTGGTGGAAGCACAGCAATACCGCAGTAGAAGCTCGACAAAA[A/G]CAGAGGCGTAAGTGCGGCAAA	Zhou et al. 2014
Ahsnp342	[G/A]	AGCTCAGATTTCTTCTCCTCAATTGGTTG[G/A]TGGTGCACGAAATTGTGATGTCCAGGCTCAAACAATCCCTGGCAACGTGAGCAAC	Zhou et al. 2014
Ahsnp368	[G/A]	AGCTCAGTCACTGAGAATCGTCGTCGAGTTGTTATCTTCGGTGTCGACCTTTGAGTTTT[G/A]TGGTAATCCGAGCTTTACTCCAAGA	Zhou et al. 2014
Ahsnp377	[C/A]	AGCTCATACCGAGTAGGAAAGGCATGCATCATATGCATTTGAGTGACTTGTTTGGTCTGCATTCTTGGGTTTG[C/A]GTAATCGGTAT	Zhou et al. 2014
Ahsnp383	[G/T]	AGCTCATATCTTGGGTAGAACTTTGCCCAAGCTTGATGAAGATGGTTGGAATTCT[G/T]TCAACCATCTGACGAACAAAGATCCTTGG	Zhou et al. 2014
Ahsnp429	[G/A]	AGCTCATGCTCATGAGCCACAACAACAACAACAACAACAACAAGAGGCA[G/A]AAGAGTAACCACACTTTCTAGCACTTCAACCACCA	Zhou et al. 2014
Ahsnp444	[C/T]	AGCTCATGTGTCGGTTACTTTGGCAGAACC[C/T]GACACACCTGGTAGCTAACCCGAATATTGTCTCTCTGATATGCCTCCACACTCT	Zhou et al. 2014
Ahsnp454	[T/C]	AGCTCATTACTGG[T/C]GTTGAATGCCAAAACTGGCACCCAACACCAGAAAGAGAGAAATCTTGGGAGTTCAACGCCCATTTAGGAGT	Zhou et al. 2014
Ahsnp601	[C/T]	AGCTCCCCTGTTTCCTTTCTTC[C/T]GTTTTCCCTTTCTTTCTTTTCCCTGTTTCCTTTCTTTCCCTTTCTGAACGTAGGTTTAGGGA	Zhou et al. 2014
Ahsnp610	[G/A]	AGCTCCCGGATTATCCGGTTTGCATAAGTGTTATCT[G/A]CCAGCTATCCTCAAAGCCCGACTTCTTGGAAAGAAAGCGTGAGTAGAA	Zhou et al. 2014
Ahsnp639	[G/A]	AGCTCCGAGCACTCAAAGTGGTCCTGGGCATATTTCTGGTGATGAGTCATCACCAGAGCGCTAAC[G/A]TGGCGTCGTTTTGCCAGGC	Zhou et al. 2014
Ahsnp662	[A/G]	AGCTCCGATTGCCGCATCGTTTGCGGCCAC[A/G]CGACCACCACGTCAAGCTCTTCGAAACCATACGAACGAAGTGGTCAGGAATTTA	Zhou et al. 2014
Ahsnp677	[T/C]	AGCTCCGGCCATATCGGT[T/C]GCTCGATTTAGTGCATGACTTTGAACTTTTTATATATTGTATGACTTTCGTATGTGACGTTCTTGT	Zhou et al. 2014
Ahsnp678	[G/A]	AGCTCCGGCCATATCGGTT[G/A]CTCGATTTAGTGCATGACTTTGAACTTTTTATATATTGTATGACTTTCGTATGTGACGTTCTTGT	Zhou et al. 2014
Ahsnp774	[C/G]	AGCTCCTTCCACACAAATGTCTGAAATGACTTGATCTAGCCTTTGATCGAAATTGAATCTTTTACTGTAAA[C/G]ATGTGGGTATCCT	Zhou et al. 2014
Ahsnp790	[A/G]	AGCTCCTTTAGAGGCAAGCTACTAGAGAAGTACATCTATATCTTTTTCTTATTTCTTATGCTGATGGGATATA[A/G]TGCATTGTTAT	Zhou et al. 2014
Ahsnp799	[A/G]	AGCTCGAACCAATGAAGCTCGACCTCAAGTTGGGGCACTATTCATACCTTGGCCTACAACTTAGCCAGGTC[A/G]AAAATGAATAAGG	Zhou et al. 2014
Ahsnp803	[A/G]	AGCTCGAAGGCGTGGCACGCCAGGTTAGCTAGAAAAAGGAGGC[A/G]TGCCACTTGAAGCCAGGCGTGGCACACCACTCAAAAACCAG	Zhou et al. 2014
Ahsnp810	[T/C]	AGCTCGACAGAGAC[T/C]CTCTGATGATGATTAGATGTTGCTCAATTGGTTTCAAGTCGGCATTGCTCCCTCCCTGGTTTGAAATTCA	Zhou et al. 2014
Ahsnp816	[A/G]	AGCTCGACCTGACTCTCTTCA[A/G]TTTGGACAATGTTGTGGAAGATGGTAGGATTGGCCCTGCCCCGGATGATGAAGATGATGATGT	Zhou et al. 2014
Ahsnp819	[G/A]	AGCTCGACGCACTGA[G/A]CGCGTGGCCACGAATGGTGCGGCGATCGGAGCCCGGATGGAGGAGTTATGGTAGTGAGAAGGAAAGGAG	Zhou et al. 2014
Ahsnp837	[A/G]	AGCTCGAGTCGAGAGCGCA[A/G]ATGGAACTGCCGGAGGAGAAGAGCAATGAAGAACAACATATTACAATATCTTTGAAAGAGTACAA	Zhou et al. 2014
Ahsnp853	[G/A]	AGCTC[G/A]ATTTGGGTTCCCTGATCACTTTTTATATTTACACTTGCGCCATTCCCGGTTTTGTTCGAGGGGACGTCCACGTAGAGAT	Zhou et al. 2014
Ahsnp862	[A/C]	AGCTCGCATCATTGTTCGCTGGTCATCTCCTTTGTTTCTTGTGTTCCTTCCATTTTTGCAAGCTTCCTCTCCATTCTCTA[A/C]GCCA	Zhou et al. 2014
Ahsnp873	[C/T]	AGCTCGCGAAGAACTT[C/T]GACCCTAACCGGAAGGCGAAATCGAAGAAGTTCAGATCGGAGATACACAAGACAAAACAACAAACATA	Zhou et al. 2014
Ahsnp919	[C/T]	AGCTCGGCCCTTTTTTCTGGATGAGAATGATGAGCCCGCCTTTCCCCTTGGAATGGCAAAAGAATG[C/T]AAGGGAATCTAGATATAC	Zhou et al. 2014
Ahsnp966	[G/A]	AGCTCGTCCCGTGGATAAACATCAGTGTGGTTGTTGTATGATTATGATTATGATCATGTTTATGATTGAGAATAACTC[G/A]AGTTAG	Zhou et al. 2014
Ahsnp972	[G/A]	AGCTCGTCGCGATGAACGTGTGGTC[G/A]CAGACGGGTCAAGGATTAGAACTCCGCATTGAAAGGTAATTGAATTTGAAGTTGAACAA	Zhou et al. 2014
Ahsnp1005	[G/T]	AGCTCTAAGTCCTAATCTAAAACCCCATGCTTTGATATGGCTTCATTTTCCTTTGACATAGCATCTCCATTTTGCTTCTA[G/T]CCTT	Zhou et al. 2014
Ahsnp1007	[G/A]	AGCTCTAA[G/A]TTGTCCATTTTCAATCAAACCATATTCAAGTGAGAAAATAAAGCTTGAGGATAAGAATTTTACCCACTTGAATGTT	Zhou et al. 2014
Ahsnp1011	[G/T]	AGCTCTAATGAAGCTGAATGCAA[G/T]TTATTTGGTACAAAGCCTCTAGAGGAAGAACTTCCACTGCTTACCAAAGAAATCCATGCTT	Zhou et al. 2014
Ahsnp1044	[G/A]	AGCTCTAGTTCTATCTTATTTTCAATGGCACCAAGAGAAGTTGAATCATCTTCATGAAAGAACACAACTTGAGGAGCA[G/A]CGGCCG	Zhou et al. 2014
Ahsnp1119	[T/C]	AGCTCTGAGCGATCACTTGAATGAAGTGTGTAAGCATTAGGAATTGACCAGCGTAGCATTGAAGC[T/C]GGAGAAACCATTTGTAACG	Zhou et al. 2014
Ahsnp1142	[A/G]	AGCTCTGCTGTGGAAGCGTCTCTCAGGATCACGTTTTTGGGCAATGGGAGTATGGCGTTGGAATTGACTTGAG[A/G]ATTGGGTATCG	Zhou et al. 2014
Ahsnp1168	[C/T]	AGCTCTTAGCCATTGTTCATGCATTGGATAGAATCAGATCTTACTTGCTAGGCTCCAAAATAGTGGTATATACGGATATG[C/T]AGCT	Zhou et al. 2014
Ahsnp1207	[G/T]	AGCTCTTCTTTTCTATCTAAATAAATCTGGTAAGATCTCTCTCTTCACGCTCCA[G/T]TTTTGTGCCCTAAGTTCTGTTCGTTTTTGT	Zhou et al. 2014
Ahsnp1213	[G/A]	AGCTCTTGACGCCGTCGCTGCGTCGACCACCAGCCTCGCTCATCGTCGTTGTCCGGCCA[G/A]GTTGCTGCTGTCGGCTGCACACGCG	Zhou et al. 2014
Ahsnp1264	[G/T]	AGCTCTTTTCCCCAATGAAAAGGGAATTAGCTACTCATGGCTTACGAAATGAAAAAAATGAAAAATGAAGAAAGAAGAGAA[G/T]AGG	Zhou et al. 2014
Ahsnp1269	[C/A]	AGCTCTTTTGACAATATAGTCTCTTGACCATTTGGTCTTTTGATCATTCATGGGGG[C/A]TGGTCATTTGGCCATCCCTGGACTTTCA	Zhou et al. 2014
Ahsnp1274	[G/A]	AGCTCTTTTTGTGTGCTGCATGTATTTGTGTGTATAGAAAGGAAATAGTGTTTGATTGGTGATTTTTTTTCTTTTGGC[G/A]TATTCA	Zhou et al. 2014
Ahsnp1294	[C/G]	TAAAATCCGATCTGTCGAGGGTGTGTGACCCTTATTTTTGGATGAGA[C/G]GGATGATGCCCTTTTTTCCATTGTATTAGGAGGAGAA	Zhou et al. 2014
Ahsnp1303	[A/C]	TAACGACTTACCTATGAAATTATTCCGGTAGAAATGTAGAG[A/C]TTGATGCGGTGAACGTGTGGGCAAACGGTGCGGTGATCGGAGC	Zhou et al. 2014
Ahsnp1325	[C/T]	TAAG[C/T]TCCAACATGGGACAACTAAGGGTGGAGCACCAAGAGCATTACATCCTCCTCCATGAAATTAGAGAAGACCAAAAGAGTCA	Zhou et al. 2014
Ahsnp1361	[T/C]	TAAAAAGGCAAAGAAGGCTACGGCGGCTCAAAACATCTCGGCCAAGGTGGCTGGGGAGGGGTCCTCT[T/C]AGGTTTTGTCGAAGCCT	Zhou et al. 2014
Ahsnp1363	[C/T]	TAATATGCACGAGACTATATATTTTTATGAGACATATCAGATCGAGAGAGGGAGAAGAG[C/T]AGATCCTCTCAACACTAGAAACT	Zhou et al. 2014
Ahsnp1386	[T/C]	TAATAGG[T/C]TGGGGTTTGCCTCTCGCCCTCCAAGGTAAGGCAAAAAGAGTGGTAACCCTCAGCCAACCTGACCTTGAAGTAAGTAC	Zhou et al. 2014
Ahsnp1420	[A/G]	TAAAATAC[A/G]TGCCAACTCTATACGAGTGACCGGGTGTTCTCGTCTTCCTTTATATTCTCCTGATTTGCGAATGGAGGGGGTGAGG	Zhou et al. 2014
Ahsnp1422	[T/A]	TAAAATATCAA[T/A]TTTTTTTTTTGAAAATTGGCCCAATAGCTGACCCACCTTGCAAAAATAAAGTTGCACTGAGCACACCAACTAA	Zhou et al. 2014
Ahsnp1424	[T/C]	TAAAATCATGTGCCAGCA[T/C]CGATGCGTACGCGTACAGCGCGCGTACGCGTCCCTGAAGTTTTCGCGATCCACGCGTGCGCGTA	Zhou et al. 2014
Ahsnp1435	[T/C]	TAAACTTTGATTGAGAGGATCCATTGCTGGTTTGGACTATACTTG[T/C]AACGGAAGTTATTTTGTGAATTCCGAATTGGCATAAATC	Zhou et al. 2014
Ahsnp1478	[C/A]	TAACCTTCTCTGAGGTTGGACTACTGCTTTGAAATTCACCTCCAAGAGAATTTTATGCATACATACTGCAGGG[C/A]TAATGCCCT	Zhou et al. 2014
Ahsnp1523	[G/A]	TAAGCA[G/A]GTTTTTAGTAGAATCAGAGATGAGTTATACCTGGGTACTCCAGTGTATTTATAACGGTGTAGAGTGACCTTTTCAG	Zhou et al. 2014
Ahsnp1541	[G/A]	TAAGTGATTCAGAGCTTATAGGGGCAAGAATGGTCTAGAAGAGGGAAAG[G/A]AAGCATGAATAAGTGGAAGGAGCATAAAAATGG	Zhou et al. 2014
Ahsnp1584	[G/A]	TAATGGTTCAAGA[G/A]TTCTATGCTAATGCATGGATCACTAAGAACCATGACCAAAGTGTGAACCCGAACCCAAGGAGGTTGGCATT	Zhou et al. 2014
Ahsnp1608	[C/A]	AGCTCTATGTTT[C/A]TACCGGAACAATTTCATAGGTAACTCATTATTTCACACCCAGCCTTCATTTCCACCAATTTTCAAGTTTTGA	Zhou et al. 2014
Ahsnp1652	[C/T]	AGCTCAAGAATGACAATGACGCAATGGACGACAGTAGTGTCTCCCT[C/T]CTTGCGGTGGCGGTGGAGGCTACTATAAGCTAGGGGAT	Zhou et al. 2014
Ahsnp1746	[T/A]	AGCTCTACAAGCTCATGACTATGCAA[T/A]CTGGAGTCTTTGTTGTTCACATGACATCCCGTCTTGCCTCTCGTGTCTTCACCATTGG	Zhou et al. 2014
Ahsnp1760	[A/G]	AGCTCTCTTTTGTAGCCTACTCATGCACCTATATTCAAGCTCTTCCCTGTGACTATATATTTGAAAACCTGGAAACTGATCA[A/G]CC	Zhou et al. 2014
Ahsnp1770	[T/C]	AGCTCTTCTACCGTTCCTCCGACTTCCTCTTCATCTCCTATGTATGCCTCTCTTC[T/C]CGGTCCTGGGGGTGGTGCGCGGTCTATTC	Zhou et al. 2014
Ahsnp1805	[C/T]	GAAACTTCGGATTGCCTTTGCAAGTACACTCCCCCCTGTTTCTTACTCAAAGCTCTA[C/T]GCGATTGGACATCCTCTTGGAGTAAAG	Zhou et al. 2014
Ahsnp1844	[G/A]	TAAACA[G/A]CTTTTAGAGATTTACTTTGCATCTCTCATGACATTTTTAGATCTGAATTTTATACACTTTGACGGCATGATTCTCTAA	Zhou et al. 2014
Ahsnp1891	[C/T]	TAACAATTTGTTCTCTATCCACATCATCAAATAAAACGGACAGCTCACTCTCCAC[C/T]CCTTTAGGTCAGCATTTTTGTTGCCGTTT	Zhou et al. 2014
Ahsnp1935	[C/G]	TAAGCAATCCTGCTCTTATCACCAACTCAGAGAAG[C/G]TCCTGATTTCCATAGGCCCTGGTAAACTGAAGATGTTGCTTCGGAGCCC	Zhou et al. 2014
Ahsnp1981	[G/A]	TAATCAATGAATTAGTTAGGTTTCTAGGATTCTCACCTTACCAATGAAAAATTAGGACAAGACTC[G/A]ACAAATCTACCAAGTTACA	Zhou et al. 2014
Ahsnp2013	[T/C]	TAATGTCAGCCTCCATGCCTTTCATCCGCGTGTTGTCAGCTATGATCATGGTGA[T/C]GAAAGCACCAATTGATAGGGTGGAGCTATG	Zhou et al. 2014
Ahsnp2021	[A/G]	TAATTCAAATAATCTGTAGCACAAAAGGATTCATAAAGTAGCTTGCAAGCGTAAATAAAAGGAATATTGAACCT[A/G]ATCAAAAGCG	Zhou et al. 2014
Ahsnp49	[A/T]	AGCTCTAA[A/T]TTCATGGTAACTCAACCTCTCTTGACTTGATCAATTGCCAATTCCTTGATCAATTTCTCATGAGAAGAGATGAAGC	Zhou et al. 2014
Ahsnp54	[G/T]	AGCTCCCAGCGAGATGTGAAGAAAGAAGAAAAAGAAGAGAGAAAGAAAAGTGAAGATGGAAGAAGAGAGA[G/T]AAGTAGAGTTCGAA	Zhou et al. 2014
Ahsnp148	[C/T]	AGCTCTGAGCATGGCACGCCAAGCTTTTGAAATCAATTCTCAACAATGGGCGTGCCA[C/T]TTGAAGCTCTGGGCGTGGCACGCCAAG	Zhou et al. 2014
Ahsnp156	[G/A]	AGCTCAAAACTCATCATCATCAGCAATTTACAAGTAGTCACCTCACAAATAGCAGGGAGCTACCAAGCCAAG[G/A]ATCCCACCATGA	Zhou et al. 2014
Ahsnp159	[C/G]	AGCTCAAAAGGATTCTTGAAAAAACTGTGGGGG[C/G]CTCAAGAAAAGAATGATCAAAGAAGTTGGATGATACTCTTTGGGCATATAG	Zhou et al. 2014
Ahsnp170	[T/C]	AGCTCAAAGAGTGCCCTAACATCGGTAACGTCGCTGGGAAGGGCGATGAAGACGGAGACATAGACGGT[T/C]CTCAGGGTTCTTCCCG	Zhou et al. 2014
Ahsnp171	[T/C]	AGCTCAAAGCAGGGACACTATTCATACC[T/C]AGGGTCGAGCTGTATGACCCGGGCTGATCGACGACAAATCAACCGACCTGTTCAGA	Zhou et al. 2014
Ahsnp280	[A/G]	AGCTCACCAAGAATCTGGGTCTGGATATGGATCAGGGTCTACT[A/G]CTACAACTGTCGCTATTGCTCCTGGACATTCGACACAGAAA	Zhou et al. 2014
Ahsnp281	[G/A]	AGCTCACCAAGAATCTGGGTCTGGATATGGATCAGGGTCTACTGCT[G/A]CAACTGTCGCTATTGCTCCTGGACATTCGACACAGAAA	Zhou et al. 2014
Ahsnp296	[T/G]	AGCTCACGGCCA[T/G]TAGGACAAGCATGCATCATGTGTATTTGTTTGTAATTATTTGGGTGTGCATCATTACTTGGGTTGCCTATTT	Zhou et al. 2014
Ahsnp321	[G/A]	AGCTCACTTAGATAGTTTTGGAGAGTAATTAGGAGTAGGAGTAGGAGTATTGT[G/A]GCTTTGCTCTCTGATGAGCGGATAATTTGTA	Zhou et al. 2014
Ahsnp384	[T/G]	AGCTCATATTCACAACATGGTTAGCCAATGTTGTCAT[T/G]GTAAAGAAACATAATAGTAAATGGCACATGTTCGTCGACTTCACTGA	Zhou et al. 2014
Ahsnp402	[T/C]	AGCTCATCGACATTGACCTCATTGCCGACCGCACCCATCCCCGACTGCTGTTCAAACTCAACGTA[T/C]AGCTCTATCATAAGCACTT	Zhou et al. 2014
Ahsnp408	[T/G]	AGCTCATCGTACTCAACATTGGAAAGGAGAAAAA[T/G]GTTAGCTTCTTACTTATTTTATTTAGGAAAAGTATAGAGTACCAACATAT	Zhou et al. 2014
Ahsnp433	[T/A]	AGCTCATGGCCAATAAAACAGGCATGCATCATATGCATCTATTTGCTATTGTTTG[T/A]TTGTGCATATTGTATCTAGTTTTCCTATC	Zhou et al. 2014
Ahsnp450	[G/A]	AGCTCATTACCTGCAGTAGGACCAGACATGCATCATACTTGTTTAT[G/A]CATAACTATGTGAATTCATATTGAATGTGATTGTGCAT	Zhou et al. 2014
Ahsnp481	[A/G]	AGCTCATTTGTCAATTTCGACCCGCACCCAACACAATCTGACTCGCAAGTCA[A/G]ATAAGGAATTCTAGCGGCATAACCTCTGCAAT	Zhou et al. 2014
Ahsnp486	[C/T]	AGCTCATTTTACAAATCTATCATCCCTCCA[C/T]AATAGTAAATCAAGCATCACAATATCACAGTGAGCTTTCCACAAATCTATCATC	Zhou et al. 2014
Ahsnp489	[T/C]	AGCTCCAAAACGCTCTAAACGCTAGGCTCGACATTTAGTTATG[T/C]TGAGGCAGAAAGCTTTGTTGAAGTTACTGGTTGCCTAGCGC	Zhou et al. 2014
Ahsnp524	[G/A]	AGCTCCACAATTCATACCCAACTTGACTTGTATGACAAGTAAGATTTTGTCAAGCACCACTTTATGGGCTGATCCACA[G/A]CTCATC	Zhou et al. 2014
Ahsnp531	[A/G]	AGCTCCACATTCTGAGGGTGACTTTGAACGCCGGTTTGGGCCATCAAATCTTGGGCAAAGTATGG[A/G]CTATCATATATTGCTGAAA	Zhou et al. 2014
Ahsnp537	[A/C]	AGCTCCACGTGTGACATGAATCCTTCACGTGAAACTCTAATCACTCTCTAGGGA[A/C]TCAATTTACCCACTAAGTCCTCTAATCCTC	Zhou et al. 2014
Ahsnp543	[C/G]	AGCTCCAGATACTCACACACCAATTCGAAACAC[C/G]GAATGGCAGCCCAGTTGTTAGGATGAAGCTATGATGGGGCAACGTCACAAC	Zhou et al. 2014
Ahsnp591	[A/G]	AGCTCCCAGTATTCGTAGAAAGTCTCGGACTCGTCCT[A/G]AACAATCATGGAAATGTCTTTCCTCAGTTTATCAGTGACTTCAGCTG	Zhou et al. 2014
Ahsnp607	[T/C]	AGCTCCCGCAAGTCCTATGGG[T/C]GTACTGGACAACGCTACACTCCACCACCTGGGAATCACCCTTCCGACTTTATTACGGAATGGA	Zhou et al. 2014
Ahsnp649	[A/C]	AGCTCCGATCGCTGCACTGTTTTGGCCACGCGTCTGCGGAGTCAAG[A/C]TCTACAAAGCCCGGGACATTGTGAGGTAAGAAAGTCAC	Zhou et al. 2014
Ahsnp652	[G/A]	AGCTCCGATTGACGAGCCGTCA[G/A]TGGCCACGCATTCATCTCGGAATTCTCTACAAAACCCAGTATATTCAAAGGTGAGAAAACGG	Zhou et al. 2014
Ahsnp653	[C/G]	AGCTCCGATTGACGAGTCGTTTACGGCCACGCGAAGCTCTCAT[C/G]GAGATCTACGTTTCTATTCAAGCAAATCTGGTAAGATTTTG	Zhou et al. 2014
Ahsnp676	[G/A]	AGCTCCG[G/A]CAGCACAAAAAGCAGCGGCAACAGTGGCAGGAGCGACGAAAATGGCGGCAACAGAGCGACCAACATGATGCAAAGAG	Zhou et al. 2014
Ahsnp683	[T/C]	AGCTCCGTAGCTCAAGTTATGGTGATTTGAAGATCAAAGAGAGTTAGGT[T/C]TCTCTCTTCTCTTATCTCTTCTCACTTCAGCGTGG	Zhou et al. 2014
Ahsnp690	[G/A]	AGCTCCTAACACTCATATGTACTTATACTCC[G/A]TAATCTTTGGTTACATCATTGAGACTGAGAAATTTTACAGAATTTGCATGATA	Zhou et al. 2014
Ahsnp692	[A/G]	AGCTCCTAACCTTCAATAATAGAGGTTTAGTTACTCATGATAATGAAAAAACTAAAGAGAAAAGA[A/G]AGATGCACGTATGTGGCTT	Zhou et al. 2014
Ahsnp720	[G/A]	AGCTCCTCAGGTGAAGCTATGTGGAAGTTGGCGTGCTTCTGACATGGTAGGCATGTGAT[G/A]CATGAGCATCTTTCCTATCTTATCC	Zhou et al. 2014
Ahsnp732	[G/A]	AGCTCCTCCGTCGCTGTCGAGATTGATGGTCATCCTTGCCTTGCCACGCCGCACCCTTACCTTGCCATTGAA[G/A]GACATCCTCTGA	Zhou et al. 2014
Ahsnp744	[A/T]	AGCTCCTCTCATATCTGTTTGAGCCTTGTGTAATAATCGGTGATAGTCAAATTACTTTGTTTCATGGCAAAAAA[A/T]TTTTCCTGCA	Zhou et al. 2014
Ahsnp750	[T/C]	AGCTCCTCTT[T/C]GCCCATTTGGTTGGGGGAGTCTTTTACGTTCGACGTTACCCAGGCGTATCGGTCGTAAGCCGCTCTCGCGGCAA	Zhou et al. 2014
Ahsnp753	[T/C]	AGCTCCTGAAGACCTCCAAGAATGATACCAAAAAGACTAAG[T/C]TAGAGGGCTTGTACACCACACATAAACATATTTTATCTCCTAG	Zhou et al. 2014
Ahsnp754	[T/C]	AGCTCCTGAAGACCTCCAAGAATGATACCAAAAAGACTAAGT[T/C]AGAGGGCTTGTACACCACACATAAACATATTTTATCTCCTAG	Zhou et al. 2014
Ahsnp765	[C/T]	AGCTCCTGCTTCCTGGAGAGTAATCC[C/T]TCTGGATGCTGCCATGTTATTTGTGCGTAAATCAACAAAATCAGCAGAAAAGGAGCTT	Zhou et al. 2014
Ahsnp767	[G/A]	AGCTCCTGTATGACGTAAGTGAGCCACTAAATCTCCTTTATT[G/A]CTGAAGCTAGTGCTTGATACTCTGTCTCACATGAAGATGCTG	Zhou et al. 2014
Ahsnp778	[G/A]	AGCTCCTTCCGTTAGGGGGGATAAGGATTTTCCAGATGCTCATAGCATAGGGGCAGTCTCGAAGCACATGAATG[G/A]CTGATTCTTC	Zhou et al. 2014
Ahsnp798	[G/C]	AGCTCGAACACACAAAACCTGTGAGATTAGAGCATTTTATCAACCTTTTTGCATGTAGTT[G/C]CATCCATAAAGATAGGTTGCATTT	Zhou et al. 2014
Ahsnp846	[A/C]	AGCTCGATGGCATGGCATAGTAGGAATGCCAATGTTAGGGGCGTGCCACTTGAAG[A/C]GTTGGCCGTGGTGCGCCAAGCCAAAATTG	Zhou et al. 2014
Ahsnp849	[T/C]	AGCTCGATTGAATGGTCTTGGAAGATGTTTGGGTATCTTAGTGAGAATTCAGATTGCGTACCACCCAGTTGGAA[T/C]ACTGTAAATC	Zhou et al. 2014
Ahsnp878	[T/A]	AGCTCGCGAGGGAGAGAGGAAGTAGCACCGCCGCCACTGGAGGGGAGCCTGACTGCCCTCCTCACTGCTACCTCCGTCAC[T/A]GTCG	Zhou et al. 2014
Ahsnp925	[T/A]	AGCTCGGCGTCGGTTAGCCTCTGAGGGGGGTGAAG[T/A]AATTGTTATCGATTCACCAGTCTCATCTAAAGGCAATTCTAAACCACCA	Zhou et al. 2014
Ahsnp939	[G/A]	AGCTCGGGGGTTCGGGG[G/A]TTGCAACTCACGTCGACGACGCTGACAGTTGCAGGTCACGGATGTTCGGCAGCGTGAGGAGTGACAG	Zhou et al. 2014
Ahsnp963	[C/T]	AGCTCGTCACAGTCATTCAATCATTGAATCCTACTTGGAATACCTTC[C/T]GGATTCTCTTGAATGCCGCCATCACTCTAGCTTACGC	Zhou et al. 2014
Ahsnp986	[G/C]	AGCTCGTTCACGGATCGCACGAGCATCTCTGGAAAAGTCGGTCTCTGTCT[G/C]TAGAGTTGCTGTTGCTTTGCTATCATGTTGAACT	Zhou et al. 2014
Ahsnp995	[A/G]	AGCTCTAAACCTCTTCTGAGATAACGTCAAACTTGTTCTATTGTCAAGGTGTCGTCATCCGAATTCTTCATGAGGA[A/G]ATGGGGGT	Zhou et al. 2014
Ahsnp998	[G/A]	AGCTCTAAATGATGCACTTCAAATGGCATTAGAAAGTAGACATTCAG[G/A]GCTTTCCAACAATATATAATAGTATGGGTGGACAGCA	Zhou et al. 2014
Ahsnp1015	[C/A]	AGCTCTACAAAACCCATGTAAGAAACTCGTAAGGAAAGCTCAAATACCTATTAGTTTCTCTCTTCAAAATTT[C/A]GGGTTTTCTAGG	Zhou et al. 2014
Ahsnp1016	[T/C]	AGCTCTACAAAACC[T/C]ATACAACCAATTCTCAGCCATTATTTTCGAGTTTCATGGGTGAAATGTTGAGATTTTGGGTTCTTTGATG	Zhou et al. 2014
Ahsnp1061	[T/C]	AGCTCTATGGACACGTACTCAGGTTACAACCAGATCCCGATGCACTGCCTTGACGAGGAAAAAA[T/C]GGTGTTCATAACGCCAACTG	Zhou et al. 2014
Ahsnp1205	[T/C]	AGCTCTTCTCTCATCATCTTCTCACTTCGGCACTTTCACATTTTCTAAACCCTAGTTTTTTCTCTGAAGCATGAGC[T/C]AGTAAACC	Zhou et al. 2014
Ahsnp1206	[G/A]	AGCTCTTCTGATCTTTTTTTTTCCCATGTAGAAGATGAATAAAT[G/A]GTCAAATTTTACACACTGTATTATATTATTGTTGGTAGTA	Zhou et al. 2014
Ahsnp1225	[C/T]	AGCTCTTGGTGAAAATTGGGAAAATTTAGGATTCGTA[C/T]CCTAGTTACAGACCACAAACATGGCAATTGAGTAAAATCAATACAAA	Zhou et al. 2014
Ahsnp1237	[A/G]	AGCTCTTTAGAAAGAGGTCGGTGACGACCAACCTTATAAGAGGTCGGCCATTTCTTGTCTTCGTCCGACCTG[A/G]ATCGTCTAAGTC	Zhou et al. 2014
Ahsnp1244	[C/T]	AGCTCTTTCCGATTCTGCTCTCTGATTCCTCATTTTCTGT[C/T]CCAAATTTGTAGTTTTTTCTCTTTTTCAGCTTTGTTTCAGCTAT	Zhou et al. 2014
Ahsnp1245	[G/A]	AGCTCTTTCTCGGATCTCTGGGAGTAGGTCGA[G/A]TTCTTCCCTTTGAATTTGGGAGTTAGCCTCTTCATTGTAGAGGATCATTCTG	Zhou et al. 2014
Ahsnp1252	[G/A]	AGCTCTTTGATTATCTGGATTGCTTTTTCTCCTAGGCCGTCAGGG[G/A]CTCGGGCTTCAGTGGGCGGTTGCCTTCCTTTGGTTGCTG	Zhou et al. 2014
Ahsnp1316	[T/C]	TAAAGCAACAGC[T/C]CAAAAGGCGCAGATCTCGCTCGAGGAAGGATAAAACGGCCGACCTGCTCAGGACAGTGGTACCTGATCTAAA	Zhou et al. 2014
Ahsnp1356	[C/T]	AGCTCGCCAC[C/T]GAAACCCTAAGTTTGCCACCATAGCCATTGCCGCCTCTGTCGTCACCGTAGTTCATCTCCTCTCCAGATCTGGT	Zhou et al. 2014
Ahsnp1357	[C/T]	AGCTCGCCACCGAAACCCTAAGTTTGCCACCATAGCCATTGCCGCCTCTGTCGTCAC[C/T]GTAGTTCATCTCCTCTCCAGATCTGGT	Zhou et al. 2014
Ahsnp1358	[T/C]	AGCTCGCCACCGAAACCCTAAGTTTGCCACCATAGCCATTGCCGCCTCTGTCGTCACCG[T/C]AGTTCATCTCCTCTCCAGATCTGGT	Zhou et al. 2014
Ahsnp1367	[G/A]	TAAAATCAATGCAAGATAAACCGTCAAAATGGGGTTTGTCAGTTATACCTGGGTGCTCCA[G/A]TGTATTTATAATGGTGAGATGTGG	Zhou et al. 2014
Ahsnp1416	[G/A]	TAAAAGACTGTCTGCCACAGAAGAGCAGATGC[G/A]ACCTTGCTTGGGCCTTATTGCCAAATGTATAGTGGGGACGCACACACACTGA	Zhou et al. 2014
Ahsnp1434	[T/C]	TAAACGATGTCTCCCTTTTC[T/C]TCCCCAGCCATAGCCCTAGCCTCCAACCAAAAAGCCTAGCCTCTTCTACGGGTCTGCTGCTGCC	Zhou et al. 2014
Ahsnp1436	[G/T]	TAAAGAAGCCTTTTTAGAGGGGTTGTTATCA[G/T]CACTTGTGTGTGTCTGATCCCTTACTGGCAATTGAGTGCCAGAGTCAGAAG	Zhou et al. 2014
Ahsnp1452	[A/C]	TAAATACTAATGAT[A/C]ATGTAGTAAAGACACAAAACATAGATAAACATATAGCATAAAAATCGAAAAATAGAGAAATAAGAATA	Zhou et al. 2014
Ahsnp1461	[A/G]	TAACAAAAGCTAACATGCATAATAGGTATTCTATATATTTACTTTGTTGACTCATCGTTATCCCTTTCTAGGGATGAAG[A/G]AAGTT	Zhou et al. 2014
Ahsnp1466	[C/T]	TAACATGACCGAATTTGGAGAGGAGAAAGAGGCAGTGAATGCCACTGAGGAAGACTTCAATGGTGTCCACTGGCCTC[C/T]AATGAGT	Zhou et al. 2014
Ahsnp1524	[T/A]	TAAGCAGGTTTTTCGTAGAATCAAAGTACGAGTTATACCTGGGGGCTCCAGGGTATTTATAATGGTGTGATAGTGACC[T/A]TTTTAG	Zhou et al. 2014
Ahsnp1528	[C/T]	TAAGC[C/T]CAAAGCCCAACCCAATCCACCCAATACTAAGAGCATCAACTCTTCTTTTTTCCCAAATCAAGGGAAAACACGCTGAAAC	Zhou et al. 2014
Ahsnp1634	[T/C]	AAACTTGCTTGAAGGCTTTCTGTGCCTAGTTTGGGATCT[T/C]GGAGGCTGTGGGAATTCCAAACACTGGTGGAAATTTCTGGACG	Zhou et al. 2014
Ahsnp1672	[T/C]	AGCTCATCAATAAGAAAAGGAGCTGGAATGAAAAGGAAAAAGAGATCCTGACATAAGAATGCAGTGCACTGATC[T/C]AAGAAGGAAT	Zhou et al. 2014
Ahsnp1674	[G/A]	AGCTCATCAGTGTAACTTCCCCTTGCCCATTTGCAAAAT[G/A]GGGACTCGATCTTCTCGGCCCCTTTCCCCAGGGTCCAGGCCAAGT	Zhou et al. 2014
Ahsnp1700	[C/T]	AGCTCCTAGGTACCGAGCAACTTCCTCTTCCCCAGTTCCCTCATCCTCATCAGAGGATGAGTATTCTTCAGAA[C/T]TCATGCATTGA	Zhou et al. 2014
Ahsnp1712	[C/T]	AGCTCGAAAATCTGAGAACAACAGAGCTGGATCCAACTACTTCAGCATCTGTATTCAAACAAGGAGCCTTTCTTGCTGA[C/T]GTCCT	Zhou et al. 2014
Ahsnp1762	[G/A]	AGCTCTGCT[G/A]TTCTTCATGAATAAATGCAAGGACTACTGTTTCTCGTTCAATCCATGCTTACTTGTTTTGCAATATATACTCTCG	Zhou et al. 2014
Ahsnp1812	[A/G]	GAACCGGGTCTTACA[A/G]GAACCCTTTTCGCGTTGCCAGCGTTGCTCTCACCGTGAAGCCGTCGCCGCCGCTACTGTACCCGCGTCG	Zhou et al. 2014
Ahsnp1848	[C/T]	TAAACTAAAAAG[C/T]ACCTCCTTCTTCCCCATTTGCATGCAACGATACAAACAGATTTGGAGAAGGGAGGAGAAGCTCTCAAACCAT	Zhou et al. 2014
Ahsnp1861	[G/A]	TAAAGCATAGTTACTACTACTAAT[G/A]ATCATGTAATGAAGACACAAACATAGATAAGCACATAACAAAGAAAAGAAAAAAAAGAAA	Zhou et al. 2014
Ahsnp1920	[G/A]	TAAGAACAAAAGGG[G/A]AATAACATAGGCTCAGAGTTGGCTTACAATGGTAGATAAAAGGTAAGGCCATTTGGGTAAGTGAGCTATG	Zhou et al. 2014
Ahsnp1972	[G/A]	TAATAGGGTCAGTGGACATACACCTTACACTAATACTTTTATGCTTCTATAGTTCT[G/A]TATACCCCACTATGCAGGAAGATTTCAA	Zhou et al. 2014
Ahsnp1989	[G/A]	TAATCGGAATCTTTGTGGCGTAAGCTAGAATGATGGCGGCATTCAAGAGAATCC[G/A]GAAGGTATTCCAAGTAGGATTCAATGAT	Zhou et al. 2014
Ahsnp1991	[C/T]	TAATCTCCGGTTACCCACTGTAACATTGG[C/T]GCCGTTACCGGGGAACCAAGAGATCAACCAGTGATGGCGGATAGATCCCCTGAAG	Zhou et al. 2014
Ahsnp8	[A/G]	AGCTCTTGTAAGAAATAGGATATCA[A/G]AAAAGAATTACATTGGAAGCAGATATCGCGATCCAGGTATGCCAAGGATATGAATAAGA	Zhou et al. 2014
Ahsnp23	[C/A]	AGCTCCAAGGA[C/A]AAAGTCAGCTACTGAATTTGATTGGCAGTTTATATCCACCGGAGTTGGCTTTGGGGTTGGAGCTGGACTAATT	Zhou et al. 2014
Ahsnp35	[C/T]	AGCTCAAAT[C/T]CGCGAAATTTATCCGCATCCGATCATATTTTGCGGATATTATTCGACCCGATCTGCACTCTGATGGGATCGGATA	Zhou et al. 2014
Ahsnp48	[A/G]	AGCTCCTTTCAAATATC[A/G]AACTATCCTCATGGCAGCTTCCATATGATCTTCTTGTATGACTTATGCATAAACTGACTTACTATTC	Zhou et al. 2014
Ahsnp67	[T/C]	TAAAGGCTCAAGGATATCCCTCTGTAACCATGGAGAGGAAGGGTTCATACCCTGGGTCGAGCTGTC[T/C]GACCCGGGATGTCCTACA	Zhou et al. 2014
Ahsnp73	[G/A]	TAATATAGTTTCAAATAATGCCCATCATTGACGATGCCATTATGTAACA[G/A]ATGTTGTATATTTATCAACAAACCCGATCTCACAT	Zhou et al. 2014
Ahsnp79	[G/A]	AGCTCCACAAATGGCAATGGCGGAGAAAGTAGCGGCGGCAGAAACCACCCCGCAATGCCTTCTCTCTCTCCTCACGTC[G/A]TTCTGT	Zhou et al. 2014
Ahsnp90	[C/T]	AGCTCAA[C/T]ACAATAAAGTGAAGTGACATGAGAACACAATCTCAAATATCAATATCCAACGAAATATAACATGTAAATTATTCCTA	Zhou et al. 2014
Ahsnp122	[A/G]	AGCTCTCCCA[A/G]ACTGAGAAGGATGATTCCTACCCTTCGGGTTCATGTGATCGATCCTCCCCAGACTTCTGCTGCTACCTCTTTTC	Zhou et al. 2014
Ahsnp164	[C/T]	AGCTCAAACCATTACCACCATCC[C/T]TGAAATATGCATTTCTGGGAGAAGGTGATACCTTTCAAGTGCTAAGGACACACAAGATATC	Zhou et al. 2014
Ahsnp168	[T/C]	AGCTCAAACTTGGGGGCTTCCTCCTCTGTTTTAGG[T/C]GTATGAACCATAGCCTTGTGGGGTGGTGAATCATCAACTTTTAGTAATT	Zhou et al. 2014
Ahsnp211	[G/A]	AGCTCAAGAACACCATTGGTCCTTCAAGGAGAAGGCGCCATGACGAACGAATTTTTGAC[G/A]GTTTAGAATTTTACAAATGAAATCT	Zhou et al. 2014
Ahsnp249	[C/T]	AGCTCAATGGCTCAATTACACCAAAGGCAAACTAAACCAACTGAGAAGAGTGGACCTCAAAC[C/T]AGTTTCTAGCAGTTGGCTAGAC	Zhou et al. 2014
Ahsnp286	[G/A]	AGCTCACCCTTTGGACTCCTGTAGCTCCAAAAATTCCATCTCGAGTGCAAGGAG[G/A]TCAGAATCCAACAGCATCAGCAGTCCTTTG	Zhou et al. 2014
Ahsnp289	[C/T]	sAGCTCACCGCCAGTGAGCCTCTCCTACTTCACCATGGTGCAGTAA[C/T]GTGGAGTCTCCTTTGTTTCACCACCACAAGCGAGCCTCC	Zhou et al. 2014
Ahsnp310	[A/G]	AGCTCACTACTTGATGG[A/G]CATATTCGGGAGAATATTAGTATTTTGGACTCGAGCTATCTTGCTGTGTTGATGGAAATTTTTGCTC	Zhou et al. 2014
Ahsnp313	[A/G]	AGCTCACTATGATTTTGCACCGGGCTTACATAATGTCATGGTTGAAATGCAAGAACACAAAGCCAAAAGCAAG[A/G]GGACATGTTCG	Zhou et al. 2014
Ahsnp314	[C/A]	AGCTCACTATGGGCATGGCACGCCAGAGAGAGGAAGTACAAAGGGGCGTGA[C/A]ACACCAAGGCCAAGCGTCGCACACCAGTTATAA	Zhou et al. 2014
Ahsnp324	[G/A]	AGCTCAGAATAGCTCACCAAAATATAAATGGTGAAGAAGGTAATAGTAACAGACTTCACAAGTTGATATGACAATGAAA[G/A]GGCCT	Zhou et al. 2014
Ahsnp357	[G/A]	AGCTCAGGACAAGTCTATTTTAGGGGGCCAGGTCGGAACCATTGGCACGCTCCTT[G/A]TGCATCATTAGGGCCAACGGGCAAAATTA	Zhou et al. 2014
Ahsnp371	[T/C]	AGCTCAGTTGCTCGCGCGTCTCTCTCCTTCGTGTCTG[T/C]TCGAGTTGTGCTTCGTGTTCGTGTCGACTCCCTTGCCTCTCTCCCTC	Zhou et al. 2014
Ahsnp484	[C/T]	AGCTCATTTGTCGGTTTCTACCCGCTCCCGACGTAACCCGAAGCAGCTGAAA[C/T]GGGTATGGCTTTCCGGTTGGACCCCTCTGCCA	Zhou et al. 2014
Ahsnp492	[T/C]	AGCTCCAAACAGAGGGCATACATATGAGTGTG[T/C]GTATGCACGGGTCGGTGCACACGCATAGGACGCAAAAAATAGAAGATGCGTG	Zhou et al. 2014
Ahsnp500	[C/T]	AGCTCCAACAGCAATCAAAGCTCCGGTGACGGTGGCTGTAACAACATGCAGTGGCTATAACATTT[C/T]CGGAAATTCAAAAGAACAG	Zhou et al. 2014
Ahsnp511	[A/G]	AGCTCCAAGTCCTTTGGCGCCATTATTGATGATCACAATTTCATGCACCAACTACT[A/G]AAACCCTTTCCTTGAAGTTCAAAAATGC	Zhou et al. 2014
Ahsnp547	[G/A]	AGCTCCAGCAGTGGCAGATTCGACCACCGCGACCAAAACA[G/A]CGGCGACGGTGGCCCCTGGTAGTGACGGTGATAGAACAGTGATG	Zhou et al. 2014
Ahsnp573	[G/A]	AGCTCCATTTTGACTTCTGTAACTCTAGAAACACTCTTCC[G/A]AATGCAGGCAGGTCAGATCCGGACAACATCTACAGTGCTTTCTC	Zhou et al. 2014
Ahsnp648	[A/T]	AGCTCCGATCGCTGCACTGTTTGTGGCCAC[A/T]CGATTATTGTATCGAGTTCTACGTTTCTATCAGAACAATTTCATAGGTAACCCG	Zhou et al. 2014
Ahsnp716	[C/A]	AGCTCCTCACCCCCACCTATGGGGTTTAGAGACTCATGCCATAGTAGATACAATATG[C/A]GATAGAAAAATGTCCTCCCCCAAATGA	Zhou et al. 2014
Ahsnp735	[G/A]	AGCTCCTCGCCGCCGTTGCTGGCGCCGAAAATCGCCTTTGAAGCCT[G/A]TGTCTGTTGGTAAGCCCTAACGCTGCTTCAGCTTCTTT	Zhou et al. 2014
Ahsnp789	[G/C]	AGCTCCTTTACTTGTAATCCGAGCTTATCAAA[G/C]GCGGATTTGAATAGGATATCTGCGGAGCTTCCCTGATCAACCAATGTTCGGT	Zhou et al. 2014
Ahsnp791	[T/G]	AGCTCCTTTAGCATTGTTAGGATAGATTTTTTCCTATGGTGCATTATCTTGGCATTCCACGCCTCT[T/G]TCATGTTATTACTGATGT	Zhou et al. 2014
Ahsnp809	[A/G]	AGCTCGACAAT[A/G]GTGACAGCGAGGAATCTTGAACCTTGCTTCCGATGACCAGACGACCCCGACGAACACTGATGCAAACCCAATC	Zhou et al. 2014
Ahsnp864	[T/C]	AGCTCGCCACTAACGACCTTGTTCCTAAAAGGAACCT[T/C]AGAATTCTGGGGAGTCTAACCAACCTCCGCCCCTGAAGTTTCAGGTC	Zhou et al. 2014
Ahsnp866	[A/G]	AGCTCGCCATGATTTTGGTTCGCAAAGGGGACCGTAGTGGTGGC[A/G]GCTGGTGCGGTGGCCAGTCGCCGGTGAAGAGAGGAGAGTG	Zhou et al. 2014
Ahsnp891	[T/A]	AGCTCGGACAATCTCTCCAGAGGCCCAAGAAGGCCCAAAGCGAAGAACCACCACCTACTAGAAGGCGGTTGGCCAA[T/A]GATATGAT	Zhou et al. 2014
Ahsnp922	[T/G]	AGCTCGGCGGCCAAGGCAGGACGCTGACAAACCCCATTTGTAGGGTTTATCTTGTATT[T/G]ATTTTAGGGGATTTTATCACCTTTCA	Zhou et al. 2014
Ahsnp937	[T/G]	AGCTCGGGCAGAGGCAATTCTTATGGGAGA[T/G]TCCAGTGTCAAGTATGTCGAAAGTATGGTCATACAGCACTAAATTGCTGGCAAA	Zhou et al. 2014
Ahsnp974	[T/C]	AGCTCGTCTCTCTTCGCAG[T/C]CCACCGCCGTCGCCACCAGTTGAGCAGCCCATCGCCATCGCCACCGCATCCCGCCGTCGAGCAGC	Zhou et al. 2014
Ahsnp1008	[T/G]	AGCTCTAAGTTTACCATCCAACTCAAGCAAACCATAATCAAGTGGGATAATAAAGCTTAGAGATAAGAGAT[T/G]TACCCACTTGAAT	Zhou et al. 2014
Ahsnp1014	[C/T]	AGCTCTACAAAACCCACTACTTTATTTTTGAGATAAGCCATGATTTTATCTCAGTTCTTCATCCCTAAATTACGAGTTT[C/T]ATGGA	Zhou et al. 2014
Ahsnp1032	[C/A]	AGCTCTACAACCAC[C/A]GGTTCTTGTGGAGAGTTAGATCTGCTATTGGCACAATGCTAAAGGTCGACAGAGTAACATCAATACATTC	Zhou et al. 2014
Ahsnp1102	[C/A]	AGCTCTCTCTGTTCTTTGCCGATAGTTCCGACTCCTCTGTCGT[C/A]GCCGTCACTCCCCTTCCTCCCTCGCTCCGGTAACCACTGTT	Zhou et al. 2014
Ahsnp1104	[C/G]	AGCTCTCTGAAAACAAAGAATACTGG[C/G]CGTGGAACGTGGCATCCTACGCATGGCACGTCGGGAAAATAAAATGGTGTCATTTGTA	Zhou et al. 2014
Ahsnp1122	[A/T]	AGCTCTGATGAGTATTCGTCCTCTGAAGAGCAAGTCACTAAGTACCTTGGTGCAATCA[A/T]GAAACTGAATGCCAAAATATTTTGTA	Zhou et al. 2014
Ahsnp1124	[T/C]	AGCTCTGATGAGTATTCTTCCTCTGAAGAGGATGAATATGCCA[T/C]TGAAGAGTGTTGGACGAAATTGTGATGGCCCTCTTTGTATT	Zhou et al. 2014
Ahsnp1138	[A/C]	AGCTCTGCTCAGAATGCTCTGTCTGTTGCTGAGAAGATGATGGAAAAGG[A/C]TTTATTGCTAAGCCTGTTTCTTCCACCATTATTAG	Zhou et al. 2014
Ahsnp1145	[G/A]	AGCTCTGGATGTCTACTTTCCAACGCTGTTGAGAGCGCGCCAATT[G/A]GAGTCCGGTAGCTTCAGAAAATCCTTTTTGAGTGCAGGG	Zhou et al. 2014
Ahsnp1171	[A/C]	AGCTCTTATGAAGCTGAATGTCAAACTCTTTGGAGGAAGAACCACCACTGCTTACTAAAGAACTCCATG[A/C]TTTGGTTCAGCAAGA	Zhou et al. 2014
Ahsnp1180	[T/C]	AGCTCTTCAACCCAAGCTCCCTTTGCATC[T/C]TGTAGTCTCGGGTGCATGAAATTGTGATCTCAAGGGAGCCAACAACTTGGTACAC	Zhou et al. 2014
Ahsnp1216	[A/G]	AGCTCTTGCCTCCTAGAGGGTAACCCTTCTGGGC[A/G]CCGCCATGTTATCTGCACATAAATCATCAAAACTAGTAGAAGATGAGCTT	Zhou et al. 2014
Ahsnp1268	[A/G]	AGCTCTTTTCTCTGTTTTGTGTGCCGAGGTCTTCT[A/G]TAAATGATTCCTCACCTTAGTGTCAGTGAACTTTATATAAAAAAAATAA	Zhou et al. 2014
Ahsnp1284	[C/T]	TAAAAGTATGGACGAAGTCATCGGGAAGTGAGTATGAGGGAGTAAG[C/T]GAACTTTTCTATCTTTTGATAGTTCAATTCAGCCCCTT	Zhou et al. 2014
Ahsnp1285	[G/A]	TAATAGTAAGAGGGAGATG[G/A]GTAGTGGTTAGAGTTGTCAGGCAAGGTTCAATACGATTGCATGCTCAAAGTTGAAGTGCAAGGAT	Zhou et al. 2014
Ahsnp1333	[G/T]	AGCTCTCCTTA[G/T]CCCTTTGCCAAATTTGATAGTAATTGCCTCCTAGAGTAACTAAAATCGACAAACCTGGATTTTCATCAGGATG	Zhou et al. 2014
Ahsnp1373	[G/A]	AGCTCAACAT[G/A]GCAGAGTGGAACAAATAGCAAAGCTATAACAATAATAAAACAAGATAACATATAACTTCTAGACACTGTGACAC	Zhou et al. 2014
Ahsnp1378	[C/T]	GCTCAGATGGAACGTAAGTGGTTGTCAAGCATGTGTTCATAAGTTTGAGAATGATGATGATTGTCA[C/T]GGATCATCACATTCATCC	Zhou et al. 2014
Ahsnp1388	[T/C]	TAAAAGGGGTCTTTTCCGGATCCTCAGGAGTTATATGAATCGGAAATAAC[T/C]TGTGTAGCCATCTAAAAAATAATAATGTGATT	Zhou et al. 2014
Ahsnp1455	[A/G]	TAAATATAATGGGAAGTGGCGCGGGTGTAATAATTGAAAGCGACCAGGGAACCCAAATC[A/G]AACTCTCCCTCAAATTTGGGTTCCC	Zhou et al. 2014
Ahsnp1456	[T/A]	TAAATATGATCCTTATTATGATACACCTACCTGGGTAGATCTAGTGACA[T/A]TGATCCACTTACTCTGGGTTTGGTTTGAGTCTCCT	Zhou et al. 2014
Ahsnp1458	[A/C]	TAAATGAG[A/C]CCAAGGCTCTTCTTCCTCCTTATTTCATCAAGGCTCGCTGAAAACTCCAGGGAGAGAAAAGAAACGCCGAAACC	Zhou et al. 2014
Ahsnp1490	[T/C]	TAACTCAAACCTGCCCTCACCATGAGCATAATCATCATCAAACTCTGGAAATTTATTACCT[T/C]TACCTTTATCATCAGATGATA	Zhou et al. 2014
Ahsnp1510	[C/T]	TAAGAACATTGCAAGATTCGGAAGCTCAAACGTGCTGTCCACCCATACTATTATATATTGTTGGAAAGC[C/T]CTGAATGTCTACTTT	Zhou et al. 2014
Ahsnp1529	[A/G]	TAAGCTGTGGGATTTATATGTGAATGGTTGTGCGAGAACGTCCGT[A/G]TATGTGGAATGGCTTCCAGGACATGTTCGGCATACTT	Zhou et al. 2014
Ahsnp1554	[C/T]	TAATATTAGAATGGTGAGATTAGATAAGCGCTTAGACCAAGTTCTAGAGGA[C/T]ATATTCCTCCCTGGAACCAAGAGGATAACTAAC	Zhou et al. 2014
Ahsnp1562	[T/G]	TAATCCTAGAAGTCCATTTACACGCTCTCAAAAGTGGACTCTGCCCCGGAAA[T/G]TTTGAAGGAACAATAGCTGTTACCAACCCGAA	Zhou et al. 2014
Ahsnp1576	[C/A]	TAATGAGCCGTCAGTGGCCACGCGTTTGT[C/A]TCAAAATTCTCTACAAAATTCATCAAACAATTTGGTAAGAAAATGACATTTTATC	Zhou et al. 2014
Ahsnp1579	[G/A]	TAATGCCCCGTGCAGAAACCAAGGAGGCAGCGTCGAAAATGAGACAACCAC[G/A]CGTGTGAGACACGAAACGCCATCAACGAACTCC	Zhou et al. 2014
Ahsnp1582	[G/A]	TAATGGCAACAAGAACGACGGCG[G/A]CACCCAAGGGTTCCGGCGGCGGCAGCGGTAGACCAGAGCACCAGAAGCGGAGGGAATTCAT	Zhou et al. 2014
Ahsnp1594	[A/G]	TAATTCACGTTTGATTCCACCAGATGCCTTGATGTGTTTGCTAGTAATTTCA[A/G]GTTGAAAAGGCTATGAATGGATCAAAAGAG	Zhou et al. 2014
Ahsnp1602	[C/T]	TAATTTAGTTCAAAAATGTTTATTTTCATTACTTTCATAAAA[C/T]AGTTCAAGTTATAAAAGTAAAATGCATACACAAGTAAATCAG	Zhou et al. 2014
Ahsnp1624	[C/A]	TAATTCTTATTTACCTTTTCTATTTATACTTCTTCTCACTTCTACTTATATCATTCGAACTCTACTT[C/A]TCTCTCTTCTTCCATCT	Zhou et al. 2014
Ahsnp1638	[C/T]	AAATGGTTCAAGAGTTCTATGCCAATGTATGGATCACTAGGAACCATGATCAAAGTATGAACC[C/T]GAATCCAAAGANTTANNTT	Zhou et al. 2014
Ahsnp1644	[T/G]	ACCTCCTTTAGCATTGTTAGGATAGATTTTTTCCTATGGTGCATTATCTTGGCATTCCACGCCTCT[T/G]TCATGTTATTAGTGATGT	Zhou et al. 2014
Ahsnp1699	[A/C]	AGCTCCGATTGCCGCTCCGTTTGTGGCCCCGCGTTTATCGCGGAGCGTTCTACACAACCCATACAAT[A/C]CATTTTGAGGTAAGCCA	Zhou et al. 2014
Ahsnp1726	[C/A]	AGCTCGGCTCCTCATGACTCCTCTTTGG[C/A]AGCGTAGTCCCGAACCTCAAAGTAATGGCATTGATTCCTCCCTTGGGGTTGGGAAA	Zhou et al. 2014
Ahsnp1735	[C/G]	AGCTCGTCGCAAGAAACGCGTAGCCGCTGACGGCACGCAAATCAGAGCA[C/G]CGTAGCTCAAGATATCGCGAAGAGAAGAGATGGGC	Zhou et al. 2014
Ahsnp1776	[C/T]	AGCTCTTTCGAAAAAGGTACTCCGAGCTGGATTCTACTGTCCGACCTTGCAGAAGGAGGCAACAGCGTT[C/T]GCCAAAACATCCCCC	Zhou et al. 2014
Ahsnp1784	[T/A]	ATCTCTTTAGCTCAAGATATGAGCTTTGGAAGAAGATAATGAATAGTACCCAAAAGGGTT[T/A]CTTCTTCCTCTCTTCAATTCAGCA	Zhou et al. 2014
Ahsnp1791	[T/C]	CGCTCAAAGAGTGCCCTAACATCGGTAACGTCGCTGGGAAGGGCGATGAAGACGGAGACATAGACGGT[T/C]CTCAGGGTTCTTGCCG	Zhou et al. 2014
Ahsnp1877	[T/C]	TAAATATCAGAGTTTCTTATAAGTATTACCCCCAT[T/C]TCCTCATGAAGAATTCGGATGACGACACCTTGACAATAGAACAAGTTTG	Zhou et al. 2014
Ahsnp1895	[G/A]	TAACACTCATATGGCTATTCTTACTGGCGTTCAAC[G/A]CCCAGTGGATGCTTCTTTTGGGCGTTGAACGCCCAAAACAGCCTTTTAC	Zhou et al. 2014
Ahsnp1923	[C/A]	TAAGACTAAAATCCACTGTCATCCCTCTTACAAAG[C/A]TGATATAGGATTCATCGGCCTTATCATATCTGACCGCGTTTGCATAGAA	Zhou et al. 2014
Ahsnp1924	[G/A]	TAAGACTTGGCTTCACAAACTTGGCGTGCCACGCCCAGAGCTTCAA[G/A]TGGCACGCCCATTGTTGAGAATTGATTTCAAAAGCTTG	Zhou et al. 2014
Ahsnp1974	[G/A]	TAATAGTGGCTTTGGATCGATTGCTAGTGGGGAGGATGGAACGCCCAATGAAGTCTAGCCAACTGCTAGAAACT[G/A]GTTTGAGG	Zhou et al. 2014
Ahsnp1978	[T/C]	TAATATTGAATTT[T/C]GTGAATTGGTGCATTTGGTTTGCGCTGTCTCACTTGAATACACTTGCACAACTATATATCATAATGATGTC	Zhou et al. 2014
Ahsnp1992	[T/C]	TAATCTCCTCTATGTCACGTCC[T/C]TGTCTCTGTTGTTCTTCCCTCATAACTCTTTGTTCTTCCTGCATGGCTCTTTGATATTTTTT	Zhou et al. 2014
Ahsnp2006	[A/G]	TAATGCCTCGGATCA[A/G]TAGCTGCTACGGCACCCATCGCCGACCGGCATCGACCTTTCAGCAACCGCACGGCCAGCCTTATTCGCG	Zhou et al. 2014
Ahsnp2039	[C/T]	TAATTTGTTAGATGTTTATTATCAACTAAAGCGAATGTTCATTTACTATGTATGCATATGTT[C/T]ATTTTATTTTGTGTGTTGGAAT	Zhou et al. 2014
Ahsnp26	[G/A]	TAATGCCGTGTTGTTTAGCAGATAAATA[G/A]CAGAATACCGAGAAGTAGTAAACAGAAGAAACAGATAACTAAAGGAAACAGAGAAA	Zhou et al. 2014
Ahsnp91	[A/G]	TAAAACTAAAGACAAAACATTACACTAAATAAGCCCAACACTAAACGTTACTGGCG[A/G]AAGTAGAACCAACATTGACTCCTCCTTG	Zhou et al. 2014
Ahsnp94	[C/T]	AGCTCTACC[C/T]TGACCTTGTCGCACTCAACATCGTCCCCTCCATCATCGACCACCTCAACTACGACAACACTAACATCGCCATCGA	Zhou et al. 2014
Ahsnp127	[A/G]	AGCTCCTCGGGGGAAGTGATGT[A/G]GGACTTTGCATGCATTTGGCATGGCTGACACTTTTTTACGAACTTGGTGGCATCTTTCTGCA	Zhou et al. 2014
Ahsnp174	[C/T]	AGCTCAAAGTCAACACGCCGGGAGGTAGTGCCTGAGCAGGTGGGCGACGTGGCGGCACTCTTTCAACACG[C/T]CGGGGCGTGGTGAC	Zhou et al. 2014
Ahsnp176	[A/C]	AGCTCAAATCAT[A/C]TTATTCTCTACCTGGAGTAAGTGAAATCACTTCACTGTGTCTACCCAGGTAACTCAAATTATCTCATTCAAT	Zhou et al. 2014
Ahsnp189	[C/T]	AGCTCAACAAGGCCAATTCTTCTCTGGACTGGTGGCACTAAATGCCACTTCA[C/T]CGGCGTTTAGTGCCAGGGACATTGATTTGCGT	Zhou et al. 2014
Ahsnp214	[T/C]	AGCTCAAGAATGTAGGTGATCATTCCTGGTAACCAAAAA[T/C]GCATATCATTTATACAGATGTCTCGAACAAAACATGCATTAGTTT	Zhou et al. 2014
Ahsnp237	[A/T]	AGCTCA[A/T]TAGTTCACCACTTTCACAATTCATTCACAACTCATCAGTTCACCACTTTCACAATTCCTTATCAATAATCATCAATAC	Zhou et al. 2014
Ahsnp302	[A/G]	AGCTCACGTGACTCAGGTCACGC[A/G]TACGCATCGTCAAGCGAAATTCACTTCCACGCGTACGCGTGGGTCACGCGTATGCGTCACT	Zhou et al. 2014
Ahsnp312	[G/A]	AGCTCACTAGATGACGATGGTGAGCGAGATGGCAATGGTGAGTGGCGGCGATGGTTAGAGACAGACGAAGGCGAAGACGAA[G/A]AGG	Zhou et al. 2014
Ahsnp325	[C/T]	AGCTCAGACAACGACGCCAGCGCTGCGAACTCAGAAGACGACGACGTCGCAAATGGAGAAGGGGTTGTGGTGTGTGGTG[C/T]TTCCG	Zhou et al. 2014
Ahsnp340	[T/C]	AGCTCAGATTGATAAGCCAACGTTAGTGACACTCA[T/C]CTTTGTCACTAACGTTGGAGATGTCATTCACTACCACGTTAGTGGCCAC	Zhou et al. 2014
Ahsnp385	[A/G]	AGCTCATCAAAACAAAAATTTTGATACTAATTTCAAAGATTTTGGCCCAA[A/G]ATTGGACCGAATGAGCCAAACCGGTTGAACCGGA	Zhou et al. 2014
Ahsnp387	[T/C]	AGCTCATCAAAGA[T/C]CTCAAACTCAACGGGGGTGGAGGCAAACCCAGAAAAATGTAAGGCCATTCTTGAGATGAGCAGCCCGGAAA	Zhou et al. 2014
Ahsnp397	[A/G]	AGCTCATCCACCGTAGGAATAGGAAAATTGTCTTTC[A/G]TCGTGTCAGGTAACTGCAACTGTGGAATCAACGTGTCATCAGCCTTCT	Zhou et al. 2014
Ahsnp401	[T/C]	AGCTCATCGAAACGAAAATTTTGGCACTAATTTCAAAGAAAACGGCCCAAAATTCGACCGAA[T/C]AGGCTGAACCGGGCCCAAACTA	Zhou et al. 2014
Ahsnp414	[A/T]	AGCTCATCTGTCGGTTACTAAGCCGC[A/T]CCTGACGTTACCCAGCAACCTCTATTTGGATAAGGCTTTTCTGTTAGCAATACACATT	Zhou et al. 2014
Ahsnp470	[T/C]	AGCTCATTGATTCCCATCAATTTGGCTGTTGTATGTAATGTCCTGCTGAAGCTTGGCTAGCCATGTCTAATC[T/C]TTTTAGACTGAA	Zhou et al. 2014
Ahsnp471	[T/C]	AGCTCATTGCTTCAACTAATCTCGTCTTCTTCAAATGGATCTCTTAGTTGTTGAGATTCAGGC[T/C]ATTGCCGATGATATAACTAGT	Zhou et al. 2014
Ahsnp474	[A/G]	AGCTCATTGGCCTCCTCAGGTGTCTTCTTCATGTGCAGGGAGCCACCTGCAAAATTATATAGAGACATCCTAGCCATATCA[A/G]AGA	Zhou et al. 2014
Ahsnp504	[T/C]	AGCTCCAACTTGGATGATGAACCTGGATTGCTACTCAGAATCTGCTCACAATAATCCCTCGTCCTCTTATATTGTTT[T/C]CTTTTGT	Zhou et al. 2014
Ahsnp526	[T/C]	AGCTCCACACCTTAGTCTATGGTGTGTAGTGATGA[T/C]AAGTCATCTTAGCCTAGTTTCACTACCCTTTTTCTTTTGTTTTCAATTG	Zhou et al. 2014
Ahsnp529	[T/C]	AGCTCCACATATAATGCCTTCATAGGTCGAACCACACTAAATAAGCTCG[T/C]TGCGGTAGTCTCCACTCCACACCTATGCATGAAGT	Zhou et al. 2014
Ahsnp555	[A/G]	AGCTCCATAACCCAATGAAAAGGGGTTTAGTGG[A/G]CTTAGCTTTTCTTGCAAAGAAAGTGTGAGTTAGGCATGATGGAAAGTTAGT	Zhou et al. 2014
Ahsnp594	[G/T]	AGCTCCCCACGGTTGGCCCAACAGTGACGCCGCTGCAGTCCATCGCG[G/T]TTGCTGCAACTATCTTCTCCTTACTTTGTTATGATTC	Zhou et al. 2014
Ahsnp606	[C/G]	AGCTCCCGAGGTTGTGGTAAGCCTACAACCTGAAGAAGTACTACAGTTAGGTAGCATGCATTGTTCCCTGGTGT[C/G]CACTTTTTCC	Zhou et al. 2014
Ahsnp632	[G/A]	AGCTCCCTTTCAAACTCAAGAAAAATGAGTATCC[G/A]GAGATCCGACATGAAATCCAAAATAGAAGTTGGGAAGTCCTAACCAACCC	Zhou et al. 2014
Ahsnp641	[A/G]	AGCTCCGATCCGCGACGGATTAGTCCTTGGCCTGTCGAACCGGGG[A/G]ATACCGTGGGCAACCAAAAAAAAATATCGGTCAGTTGAT	Zhou et al. 2014
Ahsnp654	[C/T]	AGCTCCGATTGACGCATCGTTTGCGG[C/T]CACGCGACCACGGCGTCTAGCTCTACAAAGCCCACAACTTTATTTAGGAGGAAAGCCA	Zhou et al. 2014
Ahsnp671	[C/T]	AGCTCCGCTTCCCGAACTATTTGGGAAGAAC[C/T]TGAACATAGAGAAGAAACTAGCCATTCCCGCCAACCTGAGGCGATCCATTGAG	Zhou et al. 2014
Ahsnp675	[T/G]	AGCTCCG[T/G]CAGAAGGCTAATCATAAGTGCAAACCTAGAATTTGAAGAATAATCAATCTTTGCCAAAAAATAAGCACACAAGTTTC	Zhou et al. 2014
Ahsnp697	[G/A]	AGCTCCTAGGTAGTGAGAAACTTGCTCTTCCCTAGTGTTTTCATCCTCATCA[G/A]AGGATGAGTGTTAATCAGAACTCATGCATTAC	Zhou et al. 2014
Ahsnp705	[G/A]	AGCTCCTCAATATCTCTTCCTTACCTTTGTTGCTCTTGTTGAGGTCCAT[G/A]AGTGGGATCTCTTGTTTGCGACATCCTCTTTCTAG	Zhou et al. 2014
Ahsnp777	[C/T]	AGCTCCTTCCGCGCTGCTCTCGTCGCTGCTTCTTCTCTCCTCGCCGGAGGTTGTCATCATCTCTTCTCGTCGT[C/T]GTTAGTTCAGG	Zhou et al. 2014
Ahsnp782	[C/T]	AGCTCCTTCTCTTATAGCC[C/T]GAGCTTGTCGAAGGCGGATTTGAACTATATCCGCAGAGCTTCCTTGGTCGACCAATGTTTGGTGA	Zhou et al. 2014
Ahsnp795	[G/A]	AGCTCGAAATCTAAATGCAAAGGTTGGTGTAAAGCTCAACTGAATGGGTCTAGGAAGTTGTTTGGCC[G/A]CTTTAGTGAGAATACAG	Zhou et al. 2014
Ahsnp827	[G/A]	AGCTCGAGAAGGGGACGATGATATACT[G/A]GAGATTTCCAATCATAAGAAGTAACATGATGGGTCCAGCCCGGGGCAACTGCTTTTC	Zhou et al. 2014
Ahsnp836	[T/C]	AGCTCGAGTC[T/C]TAGGCGATATAGGGATTCTAGGCAGCACGTAATCATAGGACAAATTCCATTGCCCCACATGTTTTACACGTCTG	Zhou et al. 2014
Ahsnp884	[A/C]	AGCTCGCTATTTCCTTTGAGGTCGTGT[A/C]TTTTTGGACTTCGACCCCTTTTGGGGAAGTTGTGCTCGAGCATTTTGCCTTTTGTCG	Zhou et al. 2014
Ahsnp970	[C/T]	AGCTCGTCGAGAGCTTTGTGTGGCCATAAACGGCTCG[C/T]CAATCGGAGGTCCGTAGCTCAAGTTATCACGAGTTGAAGTGAGGAGA	Zhou et al. 2014
Ahsnp973	[A/G]	AGCTCGTCGTCGTCGCCACCGCCGCCTAGAGTACCCACCGAAAGTGACACTATACGTC[A/G]TCGTCGATTCTACTGTTGTTGTCCCA	Zhou et al. 2014
Ahsnp989	[T/C]	AGCTCGT[T/C]GAAGCTCTTCAGTCTCCATCTAACCTTTTGCTTTCTCATGAAATTTAGCAAGAGTTCTTGGTTTTGCTATAGCAATG	Zhou et al. 2014
Ahsnp994	[G/C]	AGCTCTAAAATTGCCCCCAGCATGTTCTCTTTTGTAAGGCATGTGCCGCTTATCACGTGTACGCGTCGGCCA[G/C]GCGTAGGCGTTG	Zhou et al. 2014
Ahsnp996	[A/G]	AGCTCTAAACTTTGTTTATACAAATTTTGATAGGGAAAGTACGAAGA[A/G]CTAATGGAATATTTATATAATATGTACAATGGAGGTT	Zhou et al. 2014
Ahsnp1020	[G/A]	AGCTCTACAAAACTCATATAAAAAACTAGTAAGTAAAGTTTGAAAATTTCCCA[G/A]TTCCTCTCCTCTAAATTTCTGGTTTCTAGGG	Zhou et al. 2014
Ahsnp1022	[A/G]	AGCTCTACAAAATCCACTGAACAATTTGGTAGGTAA[A/G]TCTCAGTTTCTTTTCCAGCTTCTTACCCCTTCATTTTCAAAAATCTTG	Zhou et al. 2014
Ahsnp1063	[A/G]	AGCTCTATTGTAATCATAATTTCTTGATCCATCAATTCCT[A/G]TGGGATCGACCTCACTCTTGTGAGTTTTACTACTTGATGCGACC	Zhou et al. 2014
Ahsnp1096	[C/A]	AGCTCT[C/A]TATTTGTATTATTATAAAGATTATAAAGATATAAAGATTCCATGGGACTACTGCTATTTGGTCTAGAGGAAAGATTGT	Zhou et al. 2014
Ahsnp1100	[G/T]	AGCTC[G/T]CTCTCTCTCTCTCTCTCTCTATCTCTCTCTCTCTCTCTCTCTCTCTCTCTCTCTCTGCCGTGTCGCACCGTCTCCTCTG	Zhou et al. 2014
Ahsnp1143	[G/A]	AGCTCTGCTGTGTTGATGAGCGGATAATTTGTAC[G/A]CTTTTTGGCATTGTTTTTAGTATGTTTTTGGTATGATATAGTTAGTTTTT	Zhou et al. 2014
Ahsnp1172	[G/A]	AGCTCTTATGTTTGCAAATCAGCTGTTGCTACTGCAGA[G/A]AACTGAGTTTCCAAGTTGGAATGGAAACATATATGCAGTGAATGAA	Zhou et al. 2014
Ahsnp1176	[A/G]	AGCTCTTCAAAAGGAATGCGTAGACACTGAC[A/G]GCACGTAAATCGGAGCACCGTAGCTCGAGATATCGCGAAGAGAAGATGATGAT	Zhou et al. 2014
Ahsnp1193	[T/A]	AGCTCTTCCACTAAAATAGATTGGGTGAGGATTGGTAGTTGACTCAAAAAA[T/A]TTTTGAAGTCTTGAAAGACTTGTTCACATTCCT	Zhou et al. 2014
Ahsnp1210	[A/G]	AGCTCTTGAACGAGAAGCTGAAAATACAACAATGGCAGCTAATCCAGATAATGGGGGA[A/G]ATGTAAGAAAGGTCCTTAGATCTTAC	Zhou et al. 2014
Ahsnp1231	[T/C]	AGCTCTTGTCTGCTAATTTTGATGAATTGGTTTAGTAACCAGAACCACTGT[T/C]TGGAGACTCAGTATGAGTTGAACCTTCTAAAAT	Zhou et al. 2014
Ahsnp1239	[T/C]	AGCTCTTTAGGAAGAGGTCGGCAATGACCAACCTAGCAAGAGGTCGGTTGCTTTATCTCTATCCAC[T/C]CCGAACCATATAGTTCGG	Zhou et al. 2014
Ahsnp1242	[T/C]	AGCTCTTTCC[T/C]ATTCTGCACTCCGATTTCTCATTTTCTGCTCCGGAATTGCCATTTTCTCTCCCTCTCTTTGATCTTTGTGCCTA	Zhou et al. 2014
Ahsnp1371	[T/C]	TAAATCCGCACAAACTACCGGCAAGTATACCGGGTCGCATCAAGTAGTAAAACTCACAAGAGTGAGGTCGATCCCA[T/C]AGGAATTG	Zhou et al. 2014
Ahsnp1419	[C/T]	TAAAA[C/T]ACCCAGATCTGTAGATGACGAGACAGTTGCAATCAGCAGCGGTGAGAAGCAGAGCCAGAGACGGAATAGATGGCGACAA	Zhou et al. 2014
Ahsnp1479	[A/C]	TAACCTTGGTTGGATGTTTGACAATCGATGTCTCCTCCTG[A/C]TTATTAGGTGACTTACTCTCTTTACTCAATTCTGGGTATGAACC	Zhou et al. 2014
Ahsnp1484	[G/A]	TAACGCCACCCTTCTAGAATGATTGCACGCAAATCAATGTCCCTGGCACTAAACGCCG[G/A]TGAAGTGGCATTTAGTGCCACCAGTC	Zhou et al. 2014
Ahsnp1531	[T/C]	TAAGGACGAAACAAGCTCATCTTCTACTAGTTTTGATGATTTATGTGCAGATAACATGGCGG[T/C]GCCCAGAAGGGTTACCCTCT	Zhou et al. 2014
Ahsnp1535	[T/C]	TAAGGG[T/C]ACCGCCCTTATCTCTATAGGCTTGGGCTGCTTTATGATTTTGGGTCGTATTCCTCTGGTGGGCCTTTTTCTAGGTTTT	Zhou et al. 2014
Ahsnp1548	[A/G]	TAATACTTGTTGTGAATG[A/G]ATATTGTTGTTCTTCTAATTCTTGCAAGTAGGAAATTGTGTGTTTTATTCCTATCAATTGGCAT	Zhou et al. 2014
Ahsnp1598	[A/G]	TAATTGCATAGACACATACAAGGCAATACAAGGAATACACAAACAGAGGGTACAGATAAAGCACT[A/G]AGTTGAATTAGCATATAGA	Zhou et al. 2014
Ahsnp1612	[C/T]	AGCTCAACA[C/T]TCACGTGGAGTAAAGAAAGACAAGACAACAAAAAGAAAAAAGAAAAATAATTCCGATGTCATCTCCGGCATAGTC	Zhou et al. 2014
Ahsnp1630	[A/T]	AGCTCTTAGAAAAAAAAA[A/T]TTTTTTCCAGCTTTTGTTTGAATTAGAACCTGGAGGCATGGCTGGAGAAATCGGCGGGATGTTTAG	Zhou et al. 2014
Ahsnp1649	[A/T]	AGCTCAAACCC[A/T]TATCTCCTTCTCTGAAATATGTATTTTTGTGGGAAAATGATTCATATCCAGTAATTATTAGCTCTTCCCTTAA	Zhou et al. 2014
Ahsnp1684	[T/C]	AGCTCCATACGAGAAGCCTATGGTATATAATGG[T/C]ATTGTAACAGAGTAAAACTTTCCATGCTCCTCATCCTACACCTCGCTCACC	Zhou et al. 2014
Ahsnp1687	[C/G]	AGCTCCATGAATGGGCTATCTTGCTTGCTCCATCTTTTTCTAAGTGAT[C/G]GGCTTCTCTTCCTCAATGTGAATGTCTCCTTCTATT	Zhou et al. 2014
Ahsnp1693	[G/A]	AGCTCCCGTAGACCGTTATAACTGGGTTACTTCTGACGTGAAGGATATG[G/A]CCTCTAAGATAACCCTCGAGGAGCTTTTGAAGCGG	Zhou et al. 2014
Ahsnp1720	[T/C]	AGCTCGCAGTGGGGAAACAACCCGCGACAC[T/C]GCCGGAGCTTCTATGGCCGTCGGATGCTGCCGCCGCCTAACCAGCTGTTGCAGC	Zhou et al. 2014
Ahsnp1751	[A/G]	AGCTCTCCAAGCATATATGGCACTATAT[A/G]ATTGACACTAAATTTGAGGGAAAACACCTGCCCCAAAAGAGCAATGATACACATGG	Zhou et al. 2014
Ahsnp1852	[A/G]	TAAAGAAATTTTTT[A/G]TAACTCCACTATTGGGGTGGGTCGGTCTTGAAGCTCAGCTCTTAGGTCTAACTCGACTAATGATGGGAGC	Zhou et al. 2014
Ahsnp1853	[G/A]	TAAAGAAATTTTTTGTAACTCCACTATTGGGGTGGGTCGGTCTTGAAGCTCAGCTCTTAGGTCTAACTCG[G/A]CTAATGATGGGAGC	Zhou et al. 2014
Ahsnp1880	[T/C]	TAAATCAGTACGGGCTTTAGGCAAGTTTTTTGTAGAGTTTGAGTATGAGTTATAC[T/C]TGGGTGCTCCAGTGTATTTATAGTAGTGA	Zhou et al. 2014
Ahsnp1922	[A/G]	TAAGACCA[A/G]CGATAATCATAGAGAGGATAAACGAAGTGGGTTTCATGCAAATCCAGGGAGGCATGTTATACGGGATAAGAACCAC	Zhou et al. 2014
Ahsnp1934	[C/T]	TAAGATGCTCACACATCACTGTTCTATCACCGTCACTACCAGGGGCCACCGTCGCCG[C/T]TGTTTTGGTCGCGGTGGTCGAATCTGC	Zhou et al. 2014
Ahsnp1968	[G/T]	TAATAGACAAGGAAGCTGAAGCAAGGTTTAGAGTTTACCAAACAAACAGGCTTCAGAGATG[G/T]TTTCCGGCGGCGGCAGCGGGG	Zhou et al. 2014
Ahsnp1969	[T/C]	TAATAGACAAGGAAGCTGAAGCAAGGTTTAGAGTTTACCAAACAAACAGGCTTCAGAGATGTTTT[T/C]CGGCGGCGGCAGCGGGG	Zhou et al. 2014
Ahsnp1975	[G/A]	TAATAGTTTCTCCTTCCTTCACGAAGAATATTTTATACTCCTTTTGAAGCAT[G/A]TCGGTCTTTGTCTCTTTTACTTGTTGTGTACT	Zhou et al. 2014
Ahsnp2002	[G/A]	TAATGACTATGCCGGAGATGACATCGGAATTATTTTTCTTTTTTCTTTTTGTTGTCTTGTCTTTCTTTACTCCACGTGA[G/A]TGT	Zhou et al. 2014
Ahsnp2010	[T/C]	TAATGGGCTGCTTGTTGGGCTTGGGCCCATTTTTGGATCCGGTTCAACCGGTTTGGCTCATTCGGTCCAAT[T/C]TTGGGCCAAAATC	Zhou et al. 2014
Ahsnp1	[A/G]	AGCTCCAGAG[A/G]AAAAAAAAAAGAGGAGGTTGAACACCCCCCACCTAGGCGTGCAGACAATCCTTTTCCAGTCACTCTTGACATAC	Zhou et al. 2014
Ahsnp4	[G/A]	AGCTCAGAAAAAAGCCATAGAGGCCCACAAA[G/A]GCCCAAAACGAAGAACTGCCGCCTACTAAAAATGCGGTTAGCAAAAGATATGA	Zhou et al. 2014
Ahsnp5	[A/G]	AGCTCAAAACGACAAT[A/G]AAAAATGCTGACCTGGAGGGTAGAGACTGAGCTGTCTATTTTAGTTGATGTGAATGAGGAACAAATTG	Zhou et al. 2014
Ahsnp30	[T/C]	AGCTCCCAACAGAGGGGGAGAAAATCATGTTTGAGTATGAGT[T/C]TGAAGACTTGCATACTCTCATATCATCCGATGATGAAGGCAG	Zhou et al. 2014
Ahsnp58	[G/A]	AGCTCTCGACCACC[G/A]AAGAGATTTCGGGGAGGAATCAAGCGAGATAACATAAGATGAGAGAAGACACCACATCCAACTCAAAACC	Zhou et al. 2014
Ahsnp86	[T/C]	AGCTC[T/C]ACAAAACCCAACCAAGAAATTGGTAAGAAAATCATGAAATCCCTCTCAGTTTTTCCATCCAAGATTTTGTATTTTTACG	Zhou et al. 2014
Ahsnp112	[G/A]	AGCTCTTACGATGACAACGAAATTGCTAGTGATGTTGAAAACGGTG[G/A]AAACCTGTGGTGGCTCTGTTGAGACAACAAAAAAATAA	Zhou et al. 2014
Ahsnp128	[C/T]	AGCTCGACCAAGTCAC[C/T]AGAAAAGCCCAAAGAAGGGCCCAAATAGGAACACGCCCCAAAACCTAAGGCAGCCCAAGCCTATAGGG	Zhou et al. 2014
Ahsnp197	[T/C]	AGCTCAACCATACGCTCTAGTCCGTGCGTGTGCACGATAGCGTGCGTATGCACGCACACCAGAAATCTTGATTTT[T/C]CGTAACTTA	Zhou et al. 2014
Ahsnp230	[A/G]	AGCTCAAGTGGCACGCCCAGGCTCTTCCCTCTTGCTCCTCTTCTCTGGAATTTTGAATTGTGATGTGC[A/G]GAAAACGATCCGACAC	Zhou et al. 2014
Ahsnp236	[T/C]	AGCTCAATAGTTATAATAAGCACCGCCTGCCATAGCCTCCATTATTCTAATAA[T/C]ACACTTGCTTAGACACAAAGAAGCATCTTAG	Zhou et al. 2014
Ahsnp241	[T/C]	AGCTCAATCCACCATCTCACGGGATAGTGTATC[T/C]AAAGCATCGAAGTACTAGTAGCATCCTTCATTGCCTGGACTGTACATAGCA	Zhou et al. 2014
Ahsnp306	[T/C]	AGCTCACGTGTCAGTTATTTTGTCAGAATCCGACACATTTGGTAGCTAA[T/C]CTGGATATTGTCTCTAGGTTGTGCATCCCTGGAGG	Zhou et al. 2014
Ahsnp327	[G/A]	AGCTC[G/A]GACTCTCGAGACCTATAACTCAGTGTTGAGGACAACAACTCGGCATCGACTCTCCAGAATCGACTTACACCCAGGTTAT	Zhou et al. 2014
Ahsnp331	[A/C]	AGCTCAGAGGTGAAGTAGC[A/C]GTTTTTTGGCATTTTCTTTCTCGATTTCTTGTTCAGAAAGCTTCTATGGTATTTTAGTTTGGTGG	Zhou et al. 2014
Ahsnp441	[A/C]	AGCTC[A/C]TGGTTATGATGGCTTGTGCTTGAACTCATCAAGGAATCCCCACCAATGTTTGCAATTCCAATATCCTCCGGGATCCCAA	Zhou et al. 2014
Ahsnp451	[T/A]	AGCTCATTACCTGCAGTAGGGACAGACATGCATCATACTTGTTTGTGCATTATTTCTTGTTCTATTCC[T/A]TGTTTGTTGGAGCATA	Zhou et al. 2014
Ahsnp467	[T/C]	AGCTCATTCGCCTCCT[T/C]AGGCATCTTTTTCATGTGTAGTGAACTATAACACCCTAACTTTTAGCACCCCATAATCGTACTAAAAT	Zhou et al. 2014
Ahsnp483	[G/T]	AGCTCATTT[G/T]TCGGTTATCCAGCCAACCCGACAAGTCCGAAAACCTTAGACTGTACCCCGACGCGCATCCCCATGAGATCAAATC	Zhou et al. 2014
Ahsnp533	[C/T]	AGCTCCACCTATCCGCAATTCCTCT[C/T]CTTGGCCAATAACCCGCCAATACACCAACACGCAGTCCATAAAAAAAAATAATTTCTGT	Zhou et al. 2014
Ahsnp584	[A/G]	AGCTCCCACCCTTTTAGGTCGGACACTGTTCCGAGGGTTACCTGAAACTGTAGGTC[A/G]ATCTCAGATGAGATCTTCTGTACCGGTC	Zhou et al. 2014
Ahsnp691	[T/G]	AGCTCCTAACCCTAATTTAGGAGGTTTAGTTGCTCATAGCTTACAGAAAAACAATGATGAATTCGAAAATAGGGTCGAA[T/G]AAGTC	Zhou et al. 2014
Ahsnp742	[C/T]	AGCTCCTCTATACAGTGAACTCCGACAAAGCTAACAACGATTACCACGACAAACCTATTTGTACAATAGGCTCCAACAAGG[C/T]CAG	Zhou et al. 2014
Ahsnp786	[T/C]	AGCTC[T/C]TTGGTACCTATCTACAAGAATAAAGGGGATATACAAAGTTGCGGAAGTTATAGAGGGATCAAACTTGAGCCATACCATG	Zhou et al. 2014
Ahsnp801	[G/T]	AGCTCGAACTTCAGTGGAAAAGGAAGACGAAGGAGACGCTGAGGCCTGAG[G/T]GATAGGAGTTTTTTGGAGTCAGATTCAAAGAGTG	Zhou et al. 2014
Ahsnp802	[G/A]	AGCTCGAAGGCATGGCACGCCAGGATA[G/A]AGGAGCAAAAGAAAGACCTGGGCATGCCATTTGGGCTTGAAGGCGTGGCACACCAAG	Zhou et al. 2014
Ahsnp817	[A/G]	AGCTCGACGATGACCAGGCGCGATAGAGCTGGCGGCGTCTTCTCCTCCATCGCGTCTTCTTTCTCTCTGCTCTTC[A/G]TTGGCGACG	Zhou et al. 2014
Ahsnp867	[A/G]	AGCTCGCCCCCATGAATATACACCAGTGAGGGTGTTGGATATAGATTATGATTATGATTATGAACATGATAATTATC[A/G]AGAATAA	Zhou et al. 2014
Ahsnp889	[G/T]	AGCTCGGAAGTGGAGATTCAATTGTGGGTGTCTTTGTGAAAGAGGCTCAAG[G/T]GTGGGCGTGAATCACTGTCAATAAGGTACTGTT	Zhou et al. 2014
Ahsnp911	[G/A]	AGCTCGGCCAAATCACCAGGAGAGCCCAAAAAGGCCCTAACAGAGGAACAC[G/A]GCCCAAATCCAAAGGCATCCCAAGCCTATAGAG	Zhou et al. 2014
Ahsnp944	[T/G]	AGCTCGGTCCTTAGTGTTGGGACGCTGACCTCTACT[T/G]GGATGAGTGCTTTCGCGCCATATACTAGCTTGAAAGGAGGTTCTCCTG	Zhou et al. 2014
Ahsnp952	[C/T]	AGCTCGGTGAAACAATAACCAGATATGGATCGATGAGTGTCTGGA[C/T]AACCAGCCAAATCAGAGGCACTAAAACCATAAATATGTA	Zhou et al. 2014
Ahsnp967	[T/G]	AGCTCGTCGACCTCAACGACGGGGAGGTGGAATGGAGTTA[T/G]CCAGAATCAAACAAAATAAAATGTTGTCACATCAAAAAGATTTA	Zhou et al. 2014
Ahsnp982	[A/G]	AGCTCGTGTAATGGTTACAGTGACAAAGACAGTCATTCTTATGAGAC[A/G]CAGAAAGAATGTGTAAGTTCCCCAAATCAGAATTATC	Zhou et al. 2014
Ahsnp1021	[A/C]	AGCTCTACAAAACTCATATAAGAAAATGGTATGG[A/C]AAGCTCGAAATCCTCTCAGTTATTCTCTACAACATTTTGGGTTTTTAGGG	Zhou et al. 2014
Ahsnp1035	[G/T]	AGCTCTACCCTGCTTCCTTATTTTCACTAGACAATCATGATTATTCTTATTTTCATCACCACTATTTTT[G/T]TTGTTGTTTGAGGAC	Zhou et al. 2014
Ahsnp1046	[G/A]	AGCTCTATAATTGATCACTGTAACACACTTGGGATCCACGTTGATGCAGCTGGTTCTTCGAAAGAAATGATCAA[G/A]AGGAACTTAG	Zhou et al. 2014
Ahsnp1068	[G/A]	AGCTCTCAAAGTTCTTGATTCAAAGCTTCCCTCC[G/A]TTCCCTTTCATGAAGGGATGCATGTTTTCTATGTAGCACTGTTGTGTGTT	Zhou et al. 2014
Ahsnp1074	[A/G]	AGCTCTCATGAAGCTAAATGCCAAGCTATTTGGAACAGAGGCATC[A/G]GAGGAAGAACCTCTAGTACTGACCAAAGAACTAAATGCC	Zhou et al. 2014
Ahsnp1079	[G/C]	AGCTCTCCCAACAGCAA[G/C]TATCCTGGCACCTACGACCTGTGACCACAAACAGTCATACAACAGAAGGAAAAGCAACCACAATAAA	Zhou et al. 2014
Ahsnp1118	[A/G]	AGCTCTGAAGGAAAGGATAGCGAAGGCTCTGGTCCTGACC[A/G]CCCTTTACGCATTGTTCGTAGCACGGAGGACCGTGCTAAATTCT	Zhou et al. 2014
Ahsnp1133	[C/T]	AGCTCTGCAG[C/T]GTGATGACATGTCATCATATACCCATTTTTCAAGCTAATTTCACTTGTTTTGTTAGTCTTTATGCACTTTCTTG	Zhou et al. 2014
Ahsnp1178	[G/A]	AGCTCTTCAAACCAAATGTCTCCCACGAAGATCAACTGAATTAGATTGGAATTCAAATACGGGAATATATATTG[G/A]TAAAAAGGGT	Zhou et al. 2014
Ahsnp1203	[G/C]	AGCTCTTCTATGTCTCTTCCTTGTCTTTGTTGCTCCTCATGATTGTGTGGAGAAAAATGTATCCCCTGAGGTATCTCAGG[G/C]ATCT	Zhou et al. 2014
Ahsnp1215	[T/C]	AGCTCTTGCCCTTCGAGTT[T/C]GGACAGCCTGAAGTAGCCCTTTCCAAGTACTTCTATGACTCGGTAGGCTCCTTTCCAGTTTGCTG	Zhou et al. 2014
Ahsnp1230	[T/C]	AGCTCTTGTCAATGAGAACACCCACGATATCG[T/C]GATCAAGGCATGCCAAGGAGATGGATAAGAACACCCGCTATTTTCACAATCT	Zhou et al. 2014
Ahsnp1318	[C/T]	TAAAACCCCCTCCAGTAAAACC[C/T]TTTTCAGGAGAAAACAATGAACTTAGAAAAAAAAAAGAGTACACAATGGAGTAGGGTGCACT	Zhou et al. 2014
Ahsnp1352	[A/C]	TAATCAA[A/C]TGAGGATAGATCACGAGAGCCACTATGCTCTCCTTCAGCGGCTTTTAGAGGAGCAGCAAAGTCAGCAGTGGGAGATG	Zhou et al. 2014
Ahsnp1392	[C/T]	AGCTC[C/T]GTAATTCAGGAGCGTTGTGTGGTGGTGGCGCCGAGGAGGCGAATTACGAGGCCCTAGTGCCGAGACCCTAGGAACGCGT	Zhou et al. 2014
Ahsnp1398	[G/A]	TAAGTGCCAACTTGTGAGAAATGATCGA[G/A]GGATGATTTCCGAACATATCAGCAGGAGTCCATGCGAAAAGGTCGACATGTTGT	Zhou et al. 2014
Ahsnp1414	[C/T]	TAAAACGA[C/T]GCCGTTTTGGAGCCTTCCAGCGTGGCAATCCGTAGCCACATCAGCGCTGCGGTGATGAGTCATCACCTGAAATATG	Zhou et al. 2014
Ahsnp1465	[G/A]	TAACAGGAGGGGAGCTAGTTTCTTCCTCGAATGACGCTTCAGACTCGTCCTCAGATAAGACTGGTGAATTGG[G/A]TAAAACCCCTTT	Zhou et al. 2014
Ahsnp1555	[T/G]	TAATCAAACTCTTTGATCCACTCCATTCATTGCTAACTCTCTTAT[T/G]CATGGATGTTCAGATCATGATTTTTTACATGGTGCGG	Zhou et al. 2014
Ahsnp1600	[A/G]	TAATTGTCAGTTTAGACTATGCTACTGAA[A/G]AAGTGATTCTTGTTTTGAGAGATTCTAAATCGGCGCAAAATCTCATCTGTGAGCT	Zhou et al. 2014
Ahsnp1607	[T/C]	TAATCTACCAAACGTCAATCTATGTTGCTTGCTTGTAACACAGTGCTTACAAAATGGTAACTTTACCGATTTGAG[T/C]CCGGTAATG	Zhou et al. 2014
Ahsnp1640	[T/C]	AAA[T/C]GTTCAGAATGATTGGCTTCTATAGGAACTCAGAATTCAGATAGTGTTATTTATTCTCCTAGTTCAGTATGTTGATTCTT	Zhou et al. 2014
Ahsnp1663	[T/C]	AGCTCACGTGATTAGCGTCACACGTGCGCGTGGACGACGCATGCGCTTGGCTGGCAAATTTCCTCCTCACGCATA[T/C]GCGTGGGGG	Zhou et al. 2014
Ahsnp1667	[C/A]	AGCTCAGCCTAGTGTGCGT[C/A]TGCACAGACCTGCTTGCGTACGCACATCCATCAAATCAGAGCCACGCTTGTGCGTGAGCCGCACT	Zhou et al. 2014
Ahsnp1690	[A/G]	AGCTCCCAGCTGCAATGCTCGTGCTAGCCATAAGCGTCAGGCTTCAGAGAGGGGGAAGAGAAGAACAGA[A/G]CACCGACGACAAGAG	Zhou et al. 2014
Ahsnp1691	[A/T]	AGCTCCCATTGATGTTACAGCTTGTAATCATTTTAGAGGCTGGGTAGAAGGGTGTTGCTTGATCGATT[A/T]GGGGTTTATTGGTTTT	Zhou et al. 2014
Ahsnp1695	[C/T]	AGCTCCCTCCCTCAATGAGAGGGAAGTTAGCTACTCATACTTCAAAAAGTACTCACGAGTGAAGTATAATAGTGGA[C/T]CTACAACT	Zhou et al. 2014
Ahsnp1709	[T/C]	AGCTCCTTGTTATCGTGGCTTGTGCTTGTAGTCATCCGAAAATCTCCACCAATGTTTGGAATTCCAATGGCCTC[T/C]GGGATCCCCA	Zhou et al. 2014
Ahsnp1763	[G/A]	AGCTCTGCTGTACCTCGAGTATTGATGAGCAGATAATTTATACGCTTTTT[G/A]GCATTGCTTTTAGGTAGTTTTTAGTAAGTTCGAG	Zhou et al. 2014
Ahsnp1777	[G/A]	AGCTCTTTGACATCATATATGGGGGAAGCTCCTGTATGCACTCAAGATTGGGTAATAGAT[G/A]AACCTTTTGGACTAATTGAAACTT	Zhou et al. 2014
Ahsnp1808	[A/G]	GAACAAAAGCTAACATGCATAATAGGTATTCTATATATTTACTTTGTTGACTCATCGTTATCCCTTTCTAGGTATGAAG[A/G]AAGTT	Zhou et al. 2014
Ahsnp1814	[G/C]	GAAGCAGAACGCACAGGACGCGGTC[G/C]CATGACTGACGTGACCGCGTGGCAAGAAAAGCTCCGAATGATGCGACCGCATGACCC	Zhou et al. 2014
Ahsnp1821	[A/G]	GGCTCATTACCTGCACTAGGGTAGACATGCATCATACTTGGTTGC[A/G]CATTTCCTTTGTTATGATTGTGGTATGGATGTATGTTTT	Zhou et al. 2014
Ahsnp1839	[G/A]	TAAAATAGTCTATTTCATAGTTATCAGAACCGGACCGGACCGACCGGTTCGACCGAAAAACTGGTGAACCGGTA[G/A]TCTGACCGGG	Zhou et al. 2014
Ahsnp1863	[C/A]	TAAAGGAATGATGTTTACCTACTCCTCGTATAGGTCTTTGAAAAACTGAA[C/A]AACATGATCCTTGGTTTCGGTCCCATTTTCTATC	Zhou et al. 2014
Ahsnp1897	[A/G]	TAACATAATTGGCCT[A/G]TTCCCAATCACCTCCTTCCTCTACATTCACCCCTTATTTAGATGGTGGTTGAGTATTGATTACTACAAC	Zhou et al. 2014
Ahsnp1905	[T/C]	TAACGCCACTAACGTCCAAACTAACTTTCCATCATGCCTAACTCACACTTTCTTTGCAAGAAAAGCTAAG[T/C]CCACTAAACCCCTT	Zhou et al. 2014
Ahsnp1941	[A/G]	TAAGGAAGCAGTTGCCATCGTCACCCTTATCGCGACCTGTCACC[A/G]TCACTGGAGCCAGCCATCTTCATCGCCGTTCATGCCGTCC	Zhou et al. 2014
Ahsnp1970	[C/T]	TAATAGACAAGGAAGCTGAAGCAAGGTTTAGAGTTTACCAAACAAACAGGCTTCAGAGATGTTTTCCGG[C/T]GGCGGCAGCGGGG	Zhou et al. 2014
Ahsnp1997	[T/G]	TAATGAAACATGTGCTGCGCAAATTT[T/G]GGGGGGGGGGCTTTGGCCCATTTTGGAGGACTTGAAGGCTGAATTGAAGTGCTATA	Zhou et al. 2014
Ahsnp2009	[T/G]	TAATGGCCATGGT[T/G]CCTATGGTGCAAGGTATTAGAAAATTTCCAGGATCCTGTTTCTTCTGAGACAATGTTAGTTGATCCAGATT	Zhou et al. 2014
Ahsnp2026	[T/C]	TAATTGAGTAAATACCCATAGTCGTCCCTGAGATTCACGCAAATACCCATAATAAT[T/C]CCTAAGATTCCGATTTTCCCATTATAGT	Zhou et al. 2014
Ahsnp2037	[G/A]	TAATTTCTTTTGTTGTTGATG[G/A]CAATGCCATAAATGACATCAGGGAATAGTTTGCTTTTTTCTTATTTTACTTTTCTTATATGAT	Zhou et al. 2014
Ahsnp2046	[C/T]	TAGAAAGTAATTCGAACGGAATAAATTTTTGT[C/T]TGAAAAAATCTTATTTCTAGTAGTAGTGGATAAGCTGTGGATGAGGCAGA	Zhou et al. 2014
Ahsnp2058	[T/C]	TGACCATGAGCCGGATGGCTGGATCATTG[T/C]CGTGTTATGGTGGAGCCATGATTATGGCTAAGTATAAATGCATATATGCTGTTGA	Zhou et al. 2014
Ahsnp17	[C/T]	TAACATGAACCACATGACCAAACTTGGAGAGGAGGAAGAGGCAGTGATCGCCACTGATGAAGACCTCAATGGA[C/T]GTCCACTAG	Zhou et al. 2014
Ahsnp38	[A/G]	AGCTCG[A/G]AACAGGGAAGAAGCACTAAAATGATATTGGAACAACTCGACCAGGAGAAGGAAAGTTGGCAGCAAACTGGAAAGGACC	Zhou et al. 2014
Ahsnp39	[T/C]	AGCTCTTTTGAGAAAAGGTCAGTTG[T/C]AACCAACCTTTATAAGAGGTCGGTCACCTCTGTCTTCATTCAGGTTGGCTCGCCTAGCT	Zhou et al. 2014
Ahsnp45	[A/C]	AGCTCCAACAC[A/C]TGTCCCCTCAAATTAACGCCGTCCTCGGGATCGATGGGCCGAATGGTGGTAGAGGCAGATGAAGGTCTTAGTG	Zhou et al. 2014
Ahsnp89	[G/A]	AGCTCAACCCTCTTCACGACAATAAAATTTGGAGCAGAGAAGAAGTTAGTTCGTTCAGAGAGGAATTTGGGAAGG[G/A]GAATGTTAG	Zhou et al. 2014
Ahsnp104	[C/T]	TAAGAACCGA[C/T]CCGGACACGCGTCCTAGATAGCTCACTACTACAGCTGTATGGGGAAGCTTCGAGGAAGGTGGGTTCTGCCCT	Zhou et al. 2014
Ahsnp107	[T/C]	AGCTCCTCACCC[T/C]ACCTATGGGTTTAGAGACTCGTGCTGTAGGAGATACAATATGAGATGTAAAATGTCATACGTTGCCAAAATG	Zhou et al. 2014
Ahsnp133	[A/G]	AGCTCAGCTC[A/G]GTTTTAGGCATATCTAAAAAAGAAGGGTGAGAAAGAGGGTAGTGTTTCCAGGGTTGTGAAGGAGGCTGGTGGGG	Zhou et al. 2014
Ahsnp141	[G/A]	AGCTCATCC[G/A]GTGGAAAAGAGAGATATTCCTAAGATGATGGAGGCATCATCATCTTCTTTCATGTCAAGAATCATGAAGTCAACT	Zhou et al. 2014
Ahsnp175	[A/G]	AGCTCAAAGTTACTGGCATGTACATTGGGAGTCAGAATGCTACTCCCACAATTACCA[A/G]GATTGGGATTAGTATAAGAGCCCAATG	Zhou et al. 2014
Ahsnp186	[T/C]	AGCTCAAATTTG[T/C]TTAGGTAGTGTTTGATAGAGAGCCAGAGACCGAAAGACTGAGATTGAGAGACAAATACTAAGAGACAGAGAC	Zhou et al. 2014
Ahsnp243	[A/G]	AGCTCAATGAACTGCAATTCAGAAAAAAATTTCAAGGAAATTGTATGAAACTATTTC[A/G]GAAGAAACATCCAACTAAAATAAATGA	Zhou et al. 2014
Ahsnp255	[G/A]	AGCTCAATTAGAAAATGAAAAATTTAGAGA[G/A]CAGTATTAGTACATTGAAGATGTTGATGATGGTGCTGTTGTGTGTCATAATAAT	Zhou et al. 2014
Ahsnp267	[T/C]	AGCTCACAGAAATGGTTGGAAAACCTTGTGGGGTCCCTTG[T/C]AGGATTACCTTTCTCTTGTTCATCAACATGAATGATCGTCTTTG	Zhou et al. 2014
Ahsnp290	[C/T]	AGCTCACCT[C/T]CGAATAAGAAGAGAAGTTGCTTGAAGTGTTGAGAAGACACAAGAAGACTATAGGGTGGAGTCTAGTGAATATTGT	Zhou et al. 2014
Ahsnp303	[G/A]	AGCTCACGTGACTCGGGTCAC[G/A]CATACGCGTGGTTCACGCGTACGCGTTATTGAGCAAAATTCACTTTCACGCGTACGCGTGACC	Zhou et al. 2014
Ahsnp356	[T/A]	AGCTCAGCTTGTGTGAGTTGGGAATTCTCC[T/A]TGTCAGCCATGTTCGGGGATCAGAAATCCTGCAAAATAGAGGAAAAAGAGGAAA	Zhou et al. 2014
Ahsnp364	[T/C]	AGCTCAGTACCGCGACGGATTAGTCCTTGACCTGCCGGGTTGGGGGATACCGTGGGAAAC[T/C]AAAAAAAAAATCTTATGATCATTA	Zhou et al. 2014
Ahsnp372	[T/G]	AGCTCAGTTTTTTACAATAGAACACATTATTAGGAGTA[T/G]GAGTAGTGTAGTTTAGAAAATTCTCTCCTAGGGTTTATTTAGGTTT	Zhou et al. 2014
Ahsnp391	[C/T]	AGCTCATCAGCATCACTT[C/T]GCTTTGGCCATTTGCAAAATGAGGCTTAGACCTTCTTGGACCATTCCCACAGGCCCCCAAACAAGT	Zhou et al. 2014
Ahsnp434	[A/G]	AGCTCATGGCCAATAGGACA[A/G]ATATGCATCATGTGCATGTGTTTGTAATTGTTTGAGCATGCACAATTACTTGGTTTGCCTACTT	Zhou et al. 2014
Ahsnp442	[A/C]	AGCTCATGTCCAGTGGAAAAGGTATACATCATATTCATTTGTATGT[A/C]TTATTTGAGTTTGCATTACTTGGGTTTGCCTATTTGAA	Zhou et al. 2014
Ahsnp487	[T/C]	AGCTCATTTTATTTATTTTTTTTTTTGTTGCGACCCTCTCCATT[T/C]CCATCCTCTAGTGAGTATCGAACCCGAGAGAGATGGTTAT	Zhou et al. 2014
Ahsnp488	[G/A]	AGCTCCAAAAAC[G/A]CAGTACTGGGTAGAGGGTTTGTCAATATATCATCCAGCTGTGTAGTTCCAGGAACATGGTTTACATGAACAA	Zhou et al. 2014
Ahsnp505	[A/G]	AGCTCCAAGAA[A/G]CAAGGTATATCAAGAAGAAGAAGAAGCAGCCGCAGCCGCAGCAGCACGAACATTCTAAAGTGATCACTACTAA	Zhou et al. 2014
Ahsnp512	[T/C]	AGCTCCAAGTCCTTTGGCGCCATTGTTGATGATCACAATTTCGTGCACCAGCATGCA[T/C]CGAGGACGGTGCAAATTTCTAAGTGTG	Zhou et al. 2014
Ahsnp527	[C/T]	AGCTCCACAGCCACGTCAACCCACCCCTCTACTTCGCCTTCCTTCCAATTTCC[C/T]CGTTCAGCCTCTGCACCCCGGTTCTTACTTC	Zhou et al. 2014
Ahsnp530	[G/C]	AGCTCCACATGCTCTAGAGATAGAACACGATTTACTGTATGTGGTATGACT[G/C]GTTTCTTGGTAAAGACAACTCTCATGCCAGGTG	Zhou et al. 2014
Ahsnp534	[C/T]	AGCTCCACCTTCTTT[C/T]TGTCTTCTTCAGTCCAACTGGCTTCTGGTTTAGGGGAAACTGCTCCTGCTGCACTTGTGGTGGTTGGAT	Zhou et al. 2014
Ahsnp597	[A/G]	AGCTCCCCCT[A/G]TTTCTCGTTTCCTTCCTTTTTTGAACGTGTGTGTGCGTTGTATTTTGATTTAGGATTGGGGAATTAGGGTTTTA	Zhou et al. 2014
Ahsnp609	[A/G]	AGCTCCCGCCTTCGCTAGCTGAAGGT[A/G]GAGCCTCATAGTTCTTCACCCCCGGATCATGTGCATGCACGGAGGACCGTGCAACGTT	Zhou et al. 2014
Ahsnp630	[T/G]	AGCTCCCTTCGA[T/G]TTGTGGTTGAGATGGAACCTCACATCCAAACTGGGCCGCGACCCTGAAGACTCATGGATAACCCACTTCATG	Zhou et al. 2014
Ahsnp658	[C/T]	AGCTCCGATTGCCGCACC[C/T]TTTGCGGTCACGCGTTCCTCGCGAAGAACTCTATGAAACCCACCCAAGAAATTGGTAAGGAAATCA	Zhou et al. 2014
Ahsnp663	[G/T]	AGCTCCGATTGTGAGAGAATTGTAGTGTCTATTTGAGACAGAGATTCTATGTTGAGAAATTGCTGCTGCT[G/T]TAGTGGAAACACCG	Zhou et al. 2014
Ahsnp694	[T/A]	AGCTCCTAGAAAATGAACTT[T/A]CTCTTCTCTAGTGTCTTCATCCTCACTTGAGGATGAGTAGTCATAAGAACTTATGCACTGCAGA	Zhou et al. 2014
Ahsnp726	[G/A]	AGCTCCTCCACGTACTTCCATGTTGGCTACTGGTGCCAAATCTGAAAGTCACGCAGACACCCACCGACTG[G/A]CTCTCCGAACGTGG	Zhou et al. 2014
Ahsnp747	[A/C]	AGCTCCTCTT[A/C]TTGTTTCTTACTCAAACTTGAATTTATTATTACTGGTTGGGTGTTGTTGGCACCAAGATATGCATATTTCGAGT	Zhou et al. 2014
Ahsnp749	[A/G]	AGCTCCTCTTGAATTTTCTGAATTACGGTTCGCACAGTTTCAATCACTTCATTTTGGTTCCCGGAGTTGAA[A/G]CTGGAGGAGAAAG	Zhou et al. 2014
Ahsnp806	[T/C]	AGCTCGAATCAGATATG[T/C]GAAAGGACTATCCACATCTCTTTTCAGGTAACTAGTGATGTGTATTTTCGGAAAACGAAAAACGAAT	Zhou et al. 2014
Ahsnp811	[A/T]	AGCTCG[A/T]CAGCCATAACACCAAAAGGATATAGCTTCGCCCACAAAGATCTGCCATGATCGTCCTCATCATACCCATGAAGCTTCT	Zhou et al. 2014
Ahsnp812	[G/T]	AGCTCGACATGATGAAGTCGACCCAAAACATAAAGTTATAAAAGTAATCCCTGAAAGAGACCTGAACAAG[G/T]TCCAAAAGAGAGGA	Zhou et al. 2014
Ahsnp834	[G/A]	AGCTCGAGGAAGCAGCTGCGATCGG[G/A]ACAGCGAACAGGGGTTGAAGACTTGGAGCACGAGGGAAGCTAGATAGACGGAAGGACGG	Zhou et al. 2014
Ahsnp855	[T/G]	AGCTCGATTTTTTATTGGATAATTGTTTTCACGGAGCTTTGTAGGCCAAGTTCAA[T/G]TTCCATCCCCTTCATGCTTTCTACGTCTG	Zhou et al. 2014
Ahsnp887	[A/G]	AGCTCGCTTGGACCGTGTAATTGATCCTCCGTAGTCTTCT[A/G]CCACTGTTTCTTACCCTATGGTCGTTCCTCCTTCCAAAAGACCC	Zhou et al. 2014
Ahsnp890	[G/A]	AGCTCGGACAAGGTAGGAGGTAATACGTCAGCCATAGGTACA[G/A]GCGGGGGGATTGAGACCAAAAGAGGAAAAAATTTATCTCTTT	Zhou et al. 2014
Ahsnp904	[T/C]	AGCTCGGATTATAGAAGAAGCACTAAAA[T/C]AGCGAATGGCTGCCAGGTATAATCGAAAGGTAGTGCCAAGAGGTTTTGCTGAGAAT	Zhou et al. 2014
Ahsnp931	[T/G]	AGCTCGGCTTCTATAAAATATCATACCTTTATAGGTGGAATGTAATAG[T/G]CCGGTTACACTGCTTTTGGTCATCTGTATTGAAGAG	Zhou et al. 2014
Ahsnp948	[C/T]	AGCTCGGTCTTCCTTTTGAGGTCGAGTCTTTAGTCTTGGGACTTCAATCTTTTCT[C/T]GGGTAAAACCGAACTCGAGAATTTTGTTG	Zhou et al. 2014
Ahsnp959	[G/A]	AGCTCGTAGCTTGAATATTATGTACCTTGACTCTCCACTCTT[G/A]TGTGTGTGTGTGTGTGTGTGTGTGTGTGTGTGTGTGTGTGTC	Zhou et al. 2014
Ahsnp1045	[A/G]	AGCTCTAGTTTTGACATTGTGCCAAATTATATGATATGGTGTTAGATTGAGTAATTAGAAGTTTGACTTGATAAAATTTG[A/G]AAGG	Zhou et al. 2014
Ahsnp1047	[A/G]	AGCTCTATAGCTCAAGATATGACCAAATGAAGAGAATGGTAAATA[A/G]TGCCAAAACCCTCTTCTCTTATCTTCTCTACTATTGTCC	Zhou et al. 2014
Ahsnp1048	[T/C]	AGCTCTATATGCGTACGCGAGTTTAGTGGACAGAGAGGTATCCT[T/C]GCGTACGCGGGAGTGTTTCTGCGTACGCACCCATTGCAGA	Zhou et al. 2014
Ahsnp1127	[T/C]	AGCTCTGATTATGGTGTCATCTTCTTCGGAGGTGAAAGTCCGATGCTCCACCTGTGGGGAGAGCTGGTTG[T/C]ACCATCGGAGCCTG	Zhou et al. 2014
Ahsnp1148	[A/G]	AGCTCTGGGCAGAGACAATGAAGACG[A/G]CAGGGAGGTTGGGATGGAGATGATGAAAGAAGGTTGATGTTGATGGATATGCAACCGT	Zhou et al. 2014
Ahsnp1246	[C/A]	AGCTCTTTCTTTGATTATATACTCACTTACACTGGTGCCGCTCATCA[C/A]ATACGTTTTTATTGTATTGAGAGCAAATGACAATGGC	Zhou et al. 2014
Ahsnp1262	[G/A]	AGCTCTTTTCACGACATACACCCACTTGCATCCAATGACTGTGGCGTTGGGAGGAGGTGTTATGAGATGCCAAGTGTGAT[G/A]TTTC	Zhou et al. 2014
Ahsnp1299	[A/G]	TAAGATTGAATGGATGGTTTGGCATCTTCTTCTAGCAGTATCTT[A/G]TGCATGCATATGGCTGAGCTTATTCCTTTTAGGTCAGCAA	Zhou et al. 2014
Ahsnp1350	[G/C]	TAACTTTATCGGGCTCCCCATGAAAGAAATCAAAGCACAAGCAAGCAAAATGGGGCAG[G/C]CAGGTTTCGAACCTTACACATGAGGC	Zhou et al. 2014
Ahsnp1353	[A/C]	TAATGGCTTGATTGAGCTGGCTTGCTAGATCAGGGGGAGGATTACTTGTAGTTGACCTT[A/C]TCTTCTTCATGAATATTGTCCTT	Zhou et al. 2014
Ahsnp1375	[A/G]	AGCTCCAAGTCCTTT[A/G]GCGCCATTGTTGATGATCACAATTTCGTGCACCAGTCACCATGGAGAGGAAGCATGAAGAGTTTCTCTC	Zhou et al. 2014
Ahsnp1410	[A/G]	TAAAACCCTCGCGCATTCCCAAGGCTAGGACACT[A/G]ATGCTAAAGTGTGCGCTTTCAGAGGAAACGGAACAGAAACGTTCTGCATT	Zhou et al. 2014
Ahsnp1413	[G/A]	TAAAACGAGAATTTTGACACTAATTTCAAAGAATTTAGCCCAAGATTGGACTAGACGGGCT[G/A]AACCGGTCGAACCGGGTCCAAAC	Zhou et al. 2014
Ahsnp1429	[T/C]	TAAACACGTTATCAAGTAGGCAAACCAAGTAATTGTGCATGCTCAAACAATTACAAACACATGCACATGATGCATAT[T/C]TGTCCTA	Zhou et al. 2014
Ahsnp1457	[T/C]	TAAATCAGTCATCTAACGGGTCAGTTATCAACTTCGAGTTGTTTACTTACAC[T/C]ACTGAGGAGGCACAACAAAGATTCCATTTGAT	Zhou et al. 2014
Ahsnp1485	[T/C]	TAA[T/C]GCCAGTAATGGTGCTTCTATGGGCGGTGAACGCCCAGTAAGGGCTTCCTTATTGGCGTTCAACTCAATTGCATCCTCTTCA	Zhou et al. 2014
Ahsnp1496	[A/G]	TAACTGTATGTAAATCAACCGAATCCGTAGAACGGGAGCTGGTTTCTTCCTCAAATGGC[A/G]TTTCAAATCCGCCCTCAGAGAGGAC	Zhou et al. 2014
Ahsnp1522	[T/C]	TAAGCAAACCAAATACAAGATTCACAC[T/C]CAAACAATACACACAAATACAAATGATGCATGTCTGTCCTATGGCTAACGAGCTA	Zhou et al. 2014
Ahsnp1568	[T/C]	TAATCTCTTTCTCTGTTTCTTCTCTTTCTCGTTCTTCTTCAT[T/C]TTTTCAATACAAACCGTTTTTTCTCTCTCCCCCGACGGCGTT	Zhou et al. 2014
Ahsnp1571	[A/G]	TAATGAAAGCGATTGAATGCATTAGTTTTTCTAAATCTCTAATGAGTAATGAACTAATGATCATAAGATTTTTTTTTT[A/G]GTTTCC	Zhou et al. 2014
Ahsnp1575	[A/G]	TAATGACGTAAAACTCAAGAAGGAGTTGGCCGGACAGATGCTTGAACATGACTTCCTCAAAAAGGATC[A/G]AAACTTAGAAGCACGA	Zhou et al. 2014
Ahsnp1752	[A/C]	AGCTCTCCATGCT[A/C]ATTCTTCATGGTAGTGACTCCAGAATTTGTGGGCAACACTTGTACTGGGCTCACCCATTCACTCTCTGAAA	Zhou et al. 2014
Ahsnp1788	[A/C]	CAATGCAATTAGTTCATTGGTGAACAAGGGGGGTTCATCCTCCCAAGTCTCAGTACCAAATAACTTGG[A/C]ATTCAACTTCATGA	Zhou et al. 2014
Ahsnp1809	[C/A]	GAACAAGTCGGTCGCTGCATCGTCGACCATCCCAGGTCGGATAGCT[C/A]GACCCAGGGTATGAACAGTACCCCTGCTTGAGCTATGG	Zhou et al. 2014
Ahsnp1979	[A/T]	TAATCAAAATGGCATGACCACATAGCAGTAATTTGCTCTGGGTGTGATAAACAACGTCTTCTCCTGATCCGACT[A/T]GCACATCGGG	Zhou et al. 2014
Ahsnp1984	[C/T]	TAATCACTCGGATTT[C/T]GTTCCAAACTTCCCAATTGAACTCCAAATCAACAAGAACACAATCTAATTTCACACACCGTTGCCGCGG	Zhou et al. 2014
Ahsnp81	[C/T]	TAAAAAGAAATTCGAACGGAATAAATTTTTGT[C/T]TGAAAAAATCTTATTTCTAGTAGTAGTGGATAAGCTGTGGATGAGGCAGA	Zhou et al. 2014
Ahsnp93	[A/T]	TAAACACAGCTACTTATGAGTCTTGGCCGTGGCCCTAAGCATTTTGTTTTTCCAGTATTACCACAGGATACA[A/T]AAATGCCACAGA	Zhou et al. 2014
Ahsnp100	[C/T]	AGCTCTTCCTTT[C/T]ACCCACACAAGCAGCGGTGGCGACAGTGGCACCCTTCCCGGCGCCATCTCTTCCCTTTTTTCTCCTTCCTCT	Zhou et al. 2014
Ahsnp113	[A/C]	TAAAAAAAAAGCTAAACGCAACGAAGTG[A/C]AAACCCTAATCCTAATCTCAGTCTCACACTCTCACAAGACTCCAAGAGAAAGCACA	Zhou et al. 2014
Ahsnp195	[A/G]	AGCTCAACATGTTCAAGAGGACCAGTCGTGGAGGGTGCGGCATATCGGTTGATGGGTGCGGCCCG[A/G]CAGTAGGGGCAACAGAAAT	Zhou et al. 2014
Ahsnp196	[C/T]	AGCTCAACATGTTCTGGAAAACCAATTCATAGGGTTTGCGGCATGTCAGTTGATTGGTGAGGTTCAACA[C/T]TGGTGGCAGGGGAAG	Zhou et al. 2014
Ahsnp224	[T/C]	AGCTCAAGGAATCTGACGATCGGATTTTCTATCGGTAAAGAAATATAAAAATATATAATCGCATTGTGAG[T/C]ATAGCTTCTAAACC	Zhou et al. 2014
Ahsnp244	[G/A]	AGCTCAATGAGGCCCAAATCCAACTCATTTCTGATGCTTTTGAACCC[G/A]AGAATTGCAAGGGATTGAGGGGGGAGGGATGGGGTGT	Zhou et al. 2014
Ahsnp248	[T/A]	AGCTCAATGGCATCGTTTGATTCATGTAGCCGATCCCACTTAGTGAGACAAGGTTTTGTTG[T/A]TATTTATGTTGTTGTATATATAT	Zhou et al. 2014
Ahsnp256	[C/T]	AGCTCAATTCATGTTGTTGTT[C/T]CTCGTATGTAAAAGTTACAAAAGAAAACTCAAAAAAAAGTTTCACAGAGCAAAAAGAAAATGA	Zhou et al. 2014
Ahsnp277	[A/G]	AGCTCACATTTCCCATTGATTTCTATATCCTAGAATTATCCCCTAAT[A/G]ACTCAGGAAGGCCATCATCAATCCTACTTGGAAGACC	Zhou et al. 2014
Ahsnp291	[T/C]	AGCTCACCTTCTCTGTGTTCGCCGGTATCGCGTCCTCTGT[T/C]GTCGCCATTTCTCGCCTTTCAAGCAATCCTCCCCGTAAGCATAA	Zhou et al. 2014
Ahsnp292	[T/C]	AGCTCACCT[T/C]TTCTGCCAGTGCCTTGTGAAAGTTCGCGTTGTCTTTGTACTTGGTACATTTTTCCACATACTCGCTAGCATAAGT	Zhou et al. 2014
Ahsnp337	[C/T]	AGCTCAGATTCCAACAACATCAG[C/T]AGTCCTTCTGTCAGCCTTTTTCAGAGTTTTGCTCAAGTCCCTCAATTTCAGCCAGAAATTA	Zhou et al. 2014
Ahsnp399	[T/A]	AGCTCATCCGAAAAGGTATAAGTGTTCGGCCACACTTACAATG[T/A]AGGGTCAATAGAATCTCGGATCTCAACCTGAAGCAAGTGGA	Zhou et al. 2014
Ahsnp440	[C/T]	AGCTCATGGTGTTAGTGAAGTGTGGGTTGGGCTTGGGCCCATGTTTGGACCCGGTTCGACCGGTT[C/T]AGCCCGTCTAGTCCAATCT	Zhou et al. 2014
Ahsnp447	[G/C]	AGCTCATGTTTTACTGTTCCGGCCGCATTAGGCGACAGGAGTGTACATGATC[G/C]GATTCGGTTTGAAGATATAGTCAGGACCTGAT	Zhou et al. 2014
Ahsnp493	[A/G]	AGCTCCAAATGATGCACTTCCAAAGGCATTGGAAAGTAGACGTCCAGGGCTTCTCAAAAATATGTAATAGTAA[A/G]GGGTGCACATT	Zhou et al. 2014
Ahsnp517	[C/T]	AGCTCCAAGTCTTTGGCGCCATTGTTGATGATCACAATTTTGTGCAC[C/T]ACTCCACCATGTAACAACCCAAGAAAGATTTTGAGTT	Zhou et al. 2014
Ahsnp538	[A/G]	AGCTCCACTAAGTTTTGAAATCAAAGA[A/G]GTTAGCTCTGAGTCAAGAAGATGACAAACGAAGCACGAACCATGACAACAGGGACGA	Zhou et al. 2014
Ahsnp560	[G/A]	AGCTCCATAGTGGACTTTTCAACTTCTTTCTGAGGGTTATCCCTGAGATTTTCAGCAGCTCT[G/A]GAAGCTCTGGGCTGCTGCAAAT	Zhou et al. 2014
Ahsnp570	[A/G]	AGCTCCATTCTCGATGACCACCGCCATCTTTCTTCTTCTTC[A/G]CGGAAACCCAACACCATCGAAGTCATCGCTCTTCCTCCTTCTC	Zhou et al. 2014
Ahsnp680	[C/T]	AGCTCCGGTCCAAAACACTAGACATGACAAATAGCCAGCCAAGCTTCAGCATACATAGTTCAAGCATGTGAAGAGGAAGCC[C/T]TAG	Zhou et al. 2014
Ahsnp687	[T/C]	AGCTCCGTTTGACGAGTCGTTTGCGGCCATG[T/C]GAAACTGTCTCCTCTTTTTCAATTCTATCTAGGCATTGTGATGAGGATCCCAC	Zhou et al. 2014
Ahsnp700	[T/C]	AGCTCCTATCGCTGTTAGAAGCTG[T/C]CACCATGGCCGCCGCCCTCCCAACTACTGCAGTGGTTGTTTTCTGTCGCGGATGGCCACC	Zhou et al. 2014
Ahsnp702	[G/A]	AGCTCCTATGTGAGTAATGCTC[G/A]TTACTGAGGCAATCTCAATTCTAACATACTACAGGGTGTTAGTGCTGAAAAAATAGCTTATT	Zhou et al. 2014
Ahsnp708	[C/T]	AGCTCCTCAATGTTCTCCGGTA[C/T]GACGACGGCGGCGAGGGGGCATAGGTGAATGGCGTGGTGGGAGAGCAAGTTGTGGTTGTTGT	Zhou et al. 2014
Ahsnp728	[C/A]	AGCTCCTCCATTTT[C/A]GTCTTTAGCTAATAGTACTCCAACATCCCGTATCAATGAGCCATTTTGTGCATCACGTAATGATAGACAA	Zhou et al. 2014
Ahsnp731	[G/A]	AGCTCCTCCCTTTGCCCTTCGCCGTTCGCCGTTCGCCTTCGCCTTCGCCCTTCGCCCTTCGCCGTTC[G/A]CCTTCACCTTGGCTCTT	Zhou et al. 2014
Ahsnp771	[T/C]	AGCTCCTTATAAAGGTTGACT[T/C]CGAGCTAGTCCAGAAAAGGGTTTTGGCCAAAGCTGTTGCATCTTTGTATGCCTACCAATCTGT	Zhou et al. 2014
Ahsnp781	[A/G]	AGCTCCTTCTCTCTCCTTTGGCTCCTCAATAACGGCAATGGCGAT[A/G]GCTCTGGGCAGAAGCGGCGGAGACTACTTCGATGGCAAC	Zhou et al. 2014
Ahsnp792	[A/C]	AGCTCCTTTCGATC[A/C]TATTCTTTTAGTGTCAATTTTGGTGTATCTTAGAATTTCATAATGAAATTAGAATTTTATGGTGGTGGAC	Zhou et al. 2014
Ahsnp793	[A/C]	AGCTCCTTTTCATGGAAGCTTGTGCTTGAACTCATCCAGGAATCTCCACCAATGGCTTTGCG[A/C]AGAGAGCCTTCAAGCAAGTTAG	Zhou et al. 2014
Ahsnp830	[C/T]	AGCTCGAGATTTGTTGGTAGATAGCACTTATTCAAATAAGTAACTGCCCCCTAAAATCT[C/T]TCATCCACTTGCAGAAGCAATATCT	Zhou et al. 2014
Ahsnp833	[C/T]	AGCTCGAGCTATTCCCTGAAGTC[C/T]GAGAACAAGCCCAAATAAGGAAAGCAGCATTGAAGTGAAGGATGAGAAATAGATATAATAA	Zhou et al. 2014
Ahsnp870	[T/G]	AGCTCGCCGTTCGCCCTGACGACCTCCATGAGGGGGTCCTTGAGCACGTGAGGAAGGTTCCTGTTTAC[T/G]AAGGTATACTGCTCTG	Zhou et al. 2014
Ahsnp900	[G/A]	AGCTCGGATCAGCGGCAGGGGTCGGAA[G/A]GATCAGAACGGTCTTCTCAACAGCTGAAGACGGCGCTTATGAAGAACTCCGCAGACA	Zhou et al. 2014
Ahsnp976	[A/G]	AGCTCGTGCAACGTCAGCCGCGGCGGC[A/G]GCGACAGCGGCGGCGGCAACAGTGGAGGACGTCACATCTTCAAGGGAGAGAGAAGGC	Zhou et al. 2014
Ahsnp1001	[G/A]	AGCTCTAAATTGTTTTTGGAAAAAACAGAGCATGTGCGCAC[G/A]CACACAGATGTGCGCACGCACACGTACCCTAATTTCTACACCT	Zhou et al. 2014
Ahsnp1006	[G/A]	AGCTCTAAGTTGGCCATCTTTTTCAA[G/A]CAAACCATATTCAAGTGGAATTACAAAGCTTAGAGATATAAATTTTACCCACTTGAAT	Zhou et al. 2014
Ahsnp1073	[T/C]	AGCTCTCATCAAACT[T/C]TTTGGTGCGAGTTCAAAAGAGAAGAAGAAAGAAAATAGATGAAAATGATGAGCTGAGATTTCAGAAATT	Zhou et al. 2014
Ahsnp1116	[T/C]	AGCTCTCTTT[T/C]GGGCAGGGAAGCAACCAGCAGAAACTAAGACAGAAAACTTTCCTTCGTTCCGTGGTGGCATGGCTGAAAGGGAT	Zhou et al. 2014
Ahsnp1121	[T/C]	AGCTCTGATCTGTATATTATATTTTTAGC[T/C]TTCTTTCGATCTTACCTATCCATTTTACGACTATCCATTCGAGTGTGACACGCTT	Zhou et al. 2014
Ahsnp1151	[A/G]	AGCTCTGGTAGTTAGGGTGTTACATATAGCAAATGGAGTTGCGGGCATGACATCATCGCTTTTGTCACAA[A/G]CTGCGTTTGTACCA	Zhou et al. 2014
Ahsnp1159	[A/T]	AGCTCTGTGGGACAAACTAAAAACTGCCATATATCAATTGCTCCACTTACAAAAGCAACAACTAAGAAAATAAAAAAAAAA[A/T]TTG	Zhou et al. 2014
Ahsnp1301	[C/T]	TAACAATGGTAGATGCAAGGTGTTCATA[C/T]CCTGGGTCGAGCTGTCCGACCCGGGATGTTTGACGACAAGTCAACCAACCTCTTCA	Zhou et al. 2014
Ahsnp1322	[G/A]	TAAGAATGAATTCTAGAGTATCATCATGATCTGTTGAAGCCTGGCTGGCTGTAAAGCCATGTCTAAATTCTTTTGGACTA[G/A]GG	Zhou et al. 2014
Ahsnp1347	[T/C]	TAATGAACTCCTTCCTAGTACT[T/C]TCCCAAGTAATACAGAAGAGAATCCAAAAAGAGAGTGCAAGGCCATAAATATAACCAACA	Zhou et al. 2014
Ahsnp1382	[A/G]	TAAAAT[A/G]GAGATTACAGAAAGGAGCATATCAGATATATCGGACAACACCACATTCAACCACAGGAGAATCACCATTCCGACTT	Zhou et al. 2014
Ahsnp1411	[A/G]	TAAAACCCTCGCGCATTCCCAAGGCTAGGACACTGATGCTAAAGTGTGCGCTTTCAGAGGAAAC[A/G]GAACAGAAACGTTCTGCATT	Zhou et al. 2014
Ahsnp1426	[T/G]	TAAAATTCAAACATGGAACCCTTCTCCCTCACTTGTCCAAAT[T/G]CTCTCTCTCTCTCTCTCTCTCTCTCTCTCTCTCTCTCTCTTC	Zhou et al. 2014
Ahsnp1446	[T/C]	TAAAGGTTCTGGTCAGGAGGATAAGAGCTGTTATGCCAGGTCTAGTTGGAGAGACTCAGAGTGCGTTTGTCAAAGGG[T/C]GAAAAAT	Zhou et al. 2014
Ahsnp1454	[T/C]	TAAATAGGTCTTGTGCCAAAGTACTAATGCGGAAGTGCCCGCCTGACTGATAGACTAAGGTGCTAATGCGGAAGTGCC[T/C]GCAT	Zhou et al. 2014
Ahsnp1476	[C/T]	TAACC[C/T]GAGCCTTCAAATATTCAAAAAGCCCATCCATCCCTTCAGCCACTAAATCTTCAAGTTTGCGTATTTCTTTGTCATTTTT	Zhou et al. 2014
Ahsnp1480	[A/G]	TAACCTTTCTTCATTGTGCCTCGCCCTCACCGCGAT[A/G]ACGACACTCCGACGACACTCCTTGAAGAACGGCACTGCGCTTGCAA	Zhou et al. 2014
Ahsnp1483	[T/C]	TAACGCCAACTTTGGGCATATGCAAGTGAAAGCTTGGAAGCTCAGCCCAGACACG[T/C]ACCATGTGGGTCCAGAAGTGGATTTCTGC	Zhou et al. 2014
Ahsnp1514	[G/A]	TAAGAAGGCGAGGAAGGCTACTACG[G/A]CTCAAAACATCTCAGCCAAGGTGGCTGGAGAAGGTTCTTCCCAGGTTCCGTTGAAGCCA	Zhou et al. 2014
Ahsnp1550	[T/C]	TAATATCATGTTATTTTCCCGTTCTCAGGGA[T/C]GATTTCAAATTTTATGCTTGTCTGGTTCTTATTTGGTTGCGGACGATGGTGGA	Zhou et al. 2014
Ahsnp1564	[A/C]	TAATCTATGGTGTGTAGAAACTCTACCAATGAAATTACACAAGTGATA[A/C]ATGTTCAGGCATGGCCGAATGGCCAGCCCTCACAAA	Zhou et al. 2014
Ahsnp1605	[T/C]	TAATTTTGTCGAGTAAATCCC[T/C]AAAATGGTCCTTCAGATTGGGCCTGTGCACCAATATTGCCCATCAGTTTCTAAATGCTCTAAA	Zhou et al. 2014
Ahsnp1628	[T/G]	TAAGTGCTTTTAGTTGCATTAGAAAGCTGACATTTAGA[T/G]CTTTCCAACCATATATAATAGTCAATGGTGAAGCATGAAATGGAAG	Zhou et al. 2014
Ahsnp1793	[A/G]	CGCTCATTACCTGCACTCGGCTAGACATGCATCATACTTGGTTGC[A/G]CATTTCCTTTGTGATGATCGTGGTATGAATGTATGCTTT	Zhou et al. 2014
Ahsnp1816	[C/T]	GAAGTACCGA[C/T]CCGGACACGCGTCCTAGATAGCTCACTACTACAGCTGTATGGGGAAGCTTCGAGGAAGGTGGGTTCTGCCCT	Zhou et al. 2014
Ahsnp1873	[C/T]	TAAA[C/T]ACCAAAATATATTTTTACCATCCTAGACAGCTCCTGAAAAGAAAAAGGAAAGTGAAATGGAGTATAATTGAAGCTTGGGA	Zhou et al. 2014
Ahsnp1874	[G/A]	TAAATACCTCACTTCAAAGCAGCAGGAAGCCAAGAAATAAACAAAT[G/A]GCTACTCAAAACCCCTCTGAGGATAATCANNNNCCA	Zhou et al. 2014
Ahsnp1875	[C/T]	TAAATACCTCACTTCAAAGCAGCAGGAAGCCAAGAAATAAACAAATAGCTACTCAAAACCCCTCTGAGGA[C/T]AATCANNNNCCA	Zhou et al. 2014
Ahsnp1914	[T/C]	TAACTCAAACATGAGAAG[T/C]AGCTGAAGAACACCCTTGGATGTCGCCAACGTTTGCGCCAACGTTTTCCTCAAACGTGAGGTCA	Zhou et al. 2014
Ahsnp1949	[C/T]	TAAGGTTTTGAGTTGGATGTGGTGTCTTCTCATCTTATGTTCTCTCACTTGATTC[C/T]TCCCGAATTCTCTCCGATTGTCGAGAGCT	Zhou et al. 2014
Ahsnp1985	[G/C]	TAATCCAAGAGCAACATGATCCCAATTATGCTACTGACCCGGAACAAGAGAGAAGAGATCGTCTTAG[G/C]GATGTAATGGATCGG	Zhou et al. 2014
Ahsnp1995	[A/G]	TAATCTTGTTCTCTACCACACAGACACAAGTTTGTTGAAAGTCAAAACATTGGCAGGG[A/G]GTCTCAGGTAGAGAATTTTTCAAAGC	Zhou et al. 2014
Ahsnp1998	[C/T]	TAATGAAA[C/T]ATCACACTTGGCATCTCATAACACCTCCTCCCAACGCCACAGTCATTGGATGCAAGTGGGTGTATGTCGTGAAAAG	Zhou et al. 2014
Ahsnp2041	[T/C]	TACACGATGTCTCCCTTTTC[T/C]TCCCCAGCCATAGCCCTAGCCTCCAACCCAAAAGCCTAGCCTCTTCTACGGGTCTGCTGCTGCC	Zhou et al. 2014
Ahsnp2051	[T/C]	TAGTACTCAGCCCGAGCACACACCAAGTGGGCCCCGGAAG[T/C]GGATTTTTACACTAAACACCCTAGCTTACTCATTTTCTGTAA	Zhou et al. 2014
Ahsnp115	[G/A]	AGCTCCGATTGACAAGTC[G/A]CTTGCGGCCACGCGAAGCTCTCAACAAGCTCTTCCTTTATATCTAAAGAAATATGGAGAGATTTCT	Zhou et al. 2014
Ahsnp210	[G/A]	AGCTCAAGAAAGGATTGGTCTAAGAAGCTGAATGATGCACTATGGGCCTATAGAACAGCCTATAAGACTCCCATTGGAT[G/A]TCTCC	Zhou et al. 2014
Ahsnp240	[C/T]	AGCTCAATCATGCTCGACAAAGCAACTAAGAAAGAAGTTGAAGTACCAAAGCTGGAAT[C/T]GAAAACCCTGACTCCAAGCTTGAAGT	Zhou et al. 2014
Ahsnp274	[T/C]	AGCTCACATAGAGGGAGATACCTTGATCAATGAGGAGAGGC[T/C]GATCACAGGGAATGGTATGTAGAGCACTAGGGAGCATGTGCAG	Zhou et al. 2014
Ahsnp343	[G/T]	AGCTCAGCACGGAGAAGGGA[G/T]GGGTCTTCTAAGAACCTCTTTGTGTTGAGATGAGGATGTTCTCCCCAATTCTCCTCTAAAACAC	Zhou et al. 2014
Ahsnp358	[G/A]	AGCTCAGGCTAAAATGGAGGTAGTCACTAGGGTAGATGCAGTATATGAAGGCTCAGATGGGAGTGTACCAGGCAG[G/A]TGCGAGCCA	Zhou et al. 2014
Ahsnp360	[T/C]	AGCTCAGGCTGGAGTTGAGGGAATCACTGGAGCGG[T/C]TTCAGCGTATGGAGGCTAAGATGGAAGTGTACCAGGCCAAGATGAACAT	Zhou et al. 2014
Ahsnp596	[T/C]	AGCTCCCCCCCATAGAAGCGGTGGGAG[T/C]AGGGCCCCAAACATCAGAGTGAATAAGGTCAAAAGGAGAGCAAGCAAAATTATTGTG	Zhou et al. 2014
Ahsnp617	[A/G]	AGCTCCCTAGACACCAATTGATGA[A/G]AAAAGATAGCCGTGCACTGTGGGCATCTAGGCGTGGCGCAGCTGAGCAAAAAAAGCAAAA	Zhou et al. 2014
Ahsnp622	[A/C]	AGCTCCCTCCACTGCAACTCCAAAAATGCTGAACATGGGGTTCAAACCCGTGATGGCGTGAATGTG[A/C]AGCTTCTCCTTGCCACCG	Zhou et al. 2014
Ahsnp627	[G/A]	AGCTCCCTGGCTAGCGTTCAACTTCAACAACACTCTATCCAGAGTGTTCTGTTTTCACTACTGAATGATTCT[G/A]TCTCTGTTCTAA	Zhou et al. 2014
Ahsnp666	[T/C]	AGCTCCGCCGTAGGCCGCCGTCACTGGCAGCAGAAATCAGTTGCGCCATTCACCTTCCCTCTCCATTTCTTGGTCCATTT[T/C]TTCT	Zhou et al. 2014
Ahsnp688	[T/C]	AGCTCCTAAAAATTAGGGTGTTACATTGAGTTCCATCTAGTGGGAACATCGAGTTGAA[T/C]AGTACACTTGTCTTATATCCTAGCTT	Zhou et al. 2014
Ahsnp713	[C/A]	AGCTCCTCACCCCCAACAATGTTAGAGACTCATGCCGTCAGAGAATACAAATTTTAGATCTGAAATGTCATGAGATC[C/A]TAAATAA	Zhou et al. 2014
Ahsnp714	[A/T]	AGCTCCTCACCCCCAACAATGTTAGAGACTCATGCCGTCAGAGAATACAAATTTTAGATCTGAAATGTCATGAGATCA[A/T]AAATAA	Zhou et al. 2014
Ahsnp766	[T/C]	AGCTCCTGCTTTTGGTGGGTAGCTTATATGGCCTTGATGGTGCAGGTGCAG[T/C]AGATCCTGCTATGTCCTACAGCAGAAAAATAGT	Zhou et al. 2014
Ahsnp875	[C/T]	AGCTCGCGAGGAACTTTGACCG[C/T]GACCTGAATGCAAGATCGAAGAAGTTCATATCGGGGATGCCCACGATAAAACAACAAATATT	Zhou et al. 2014
Ahsnp940	[A/G]	AGCTCGGGTCGGGTTGACCCGCG[A/G]AAATCCTGGGCCGGGCCGTAACACATATAAATTTTGTTATAAAACAGTTTTACAGACGGCA	Zhou et al. 2014
Ahsnp983	[G/A]	AGCTC[G/A]TGTCAACAGCTATTCTAAATGTGTTTTGGTATTGAGATATCGTTGGAAGATAGTAGAATAGTAAACAACCTCCTTAGGT	Zhou et al. 2014
Ahsnp1065	[C/A]	AGCTCTATTGTGATTCAATGGATCAATATAGTTTTCATTCTTCTTCTT[C/A]TTTCTTTTCTCTTGATCTTACTAGAAAGCTTTCAAT	Zhou et al. 2014
Ahsnp1117	[T/C]	AGCTCTGAACTTCGATAGTCTTGTATTACATGGACGATCGTAGTCAATTGGATTTTACAGTCATAGTCGGAGA[T/C]AAAAGCTCTGA	Zhou et al. 2014
Ahsnp1123	[C/T]	AGCTCTGATGAGTATTCTTCCTCTGAAGAGGA[C/T]GAAGATGTCACTGAAGAGCAAGTTGCTAAGAAGCAATCATGAAGCTAAATGA	Zhou et al. 2014
Ahsnp1128	[A/G]	AGCTCTGATTGACTGATGAA[A/G]CAACACGTGGAGGTGTGCTGAATACTCCTCTCTATATAAGAAAAAATTCGGTACCATTTTAATT	Zhou et al. 2014
Ahsnp1141	[C/T]	AGCTCTGCTGTATCTCAAGTTTCAAATACAATTACTATTATTTTCTATTCAATTCTCCTTATTCTTATTACAAGATATA[C/T]GTTGC	Zhou et al. 2014
Ahsnp1181	[A/G]	AGCTCTTCAACCGCTTAGCAAGT[A/G]GTTTGGCATTCAAGAAAGTTTGCGCCTTGACGGTTGTTCTTTGAGTTGCTCTCTTGTAGAT	Zhou et al. 2014
Ahsnp1198	[A/C]	AGCTCTTCCTTTTTATCTAAAAAAATATGGTAAGAT[A/C]TCGAAATTCACTCCCCATCTTCCTGCCCTAACTTCTGCATTTTTAGGG	Zhou et al. 2014
Ahsnp1241	[A/C]	AGCTCTTTATTGATCACTGGACGT[A/C]CCAGGAGGTCTTCCTCCTTGGATTCACGTCCTCTCCCTCCCTTACTGGTTCGGCCATGGC	Zhou et al. 2014
Ahsnp1349	[T/C]	TAAACCTCAGGTCGTCTCACAAGAAATTG[T/C]AATGAAGTGGTCAATTATTGGCTATGAAGATGCAAGGAGTTTGATTGATAAAGGG	Zhou et al. 2014
Ahsnp1354	[C/T]	TAAGTGAGGTCAACTTTATCTTTCAAGGGAACCGCCTTCATCTCTA[C/T]GGGCTTGGGCTGCCCTTGGATTTGGGACGTGTTCCT	Zhou et al. 2014
Ahsnp1403	[T/A]	T[T/A]AAAAAAAAAAAGGAGAACCCTAAATCCCCAACGGCCGTAACCCAATCCCACACTCCTCTCTTCTCCTCTCCTCTCTGAAACTG	Zhou et al. 2014
Ahsnp1404	[A/T]	T[A/T]AAAAAAAATGTTAGTGAAATGTGGAATGACTTATTTACCCCTATCTTCTCCCTATAAACACTATCGTTGCAGTATCTGAGG	Zhou et al. 2014
Ahsnp1427	[A/G]	TAAACAAAACTAATAAAACAAAGTAAAAACAGGGCAGTAGGAAACCTGGAAGCAGAGTAGAA[A/G]AAATGGACCAAGAAATGGAGAG	Zhou et al. 2014
Ahsnp1439	[T/C]	TAAAGAGACACAACTTCTTATTTCTCTT[T/C]TTCTTCATTATTCATGCTGGGAAACATTTCATGGAGGGAGAAGAGCAAAAGCAA	Zhou et al. 2014
Ahsnp1537	[C/A]	TAAGGTTCATATTACCGTTGTAACAGCGTCGCGCAAGTTTTTGGTCTCCCTTT[C/A]TGGTGGCGATCCCTTCTGGAGTTGGTAACTT	Zhou et al. 2014
Ahsnp1543	[C/G]	TAAGTTGGTGAAATTGGTT[C/G]AGTGCAAAATTTTGTCTAGGGTTATGTTTATAACTCTTTACGGAAGAGTTTCATGTAATGGAGCT	Zhou et al. 2014
Ahsnp1549	[T/A]	TAATAGTGTACATATTTTATTTTATTTGCATATTTTATTTTT[T/A]TTTTTTTTTACCATGAGCTATATGTTTTTCTCATTGAATGAC	Zhou et al. 2014
Ahsnp1558	[T/C]	TAATCATCTGGATTTCGTTC[T/C]AAACCGCTCAATTGAACTCCAAATCAACAAGAACACAATCTAATTCATACAATATCACTATAAT	Zhou et al. 2014
Ahsnp1597	[A/C]	TAATTCTT[A/C]TAGGGAGGTGTTGATGTGCTCCCAATAGTTTTATGGAGGAAAGTGCATTTGAGGCATCTCCGGATCTCATGGAAAT	Zhou et al. 2014
Ahsnp1626	[A/G]	AGCTCG[A/G]TTTCAATTACAACCTTGCTTCCGAGTATAGGGGGTACACGTCAGGTGCAAATTATTGCTGAATTGGAGTTTCATTTAT	Zhou et al. 2014
Ahsnp1646	[T/G]	AGATCTTGAGTTACTAATGTCCAAGTAATTGAT[T/G]ATTGGGATCCATAGACTCTAGTTCTCACTAATTGAATTAGTGAAGAGTTAG	Zhou et al. 2014
Ahsnp1661	[A/G]	AGCTCACCGCCATTCTGCACT[A/G]CGCCTATGAGAAACATTGTGGTTGAAATGCAAGAAGTGAAAGCCAAAAGGAAGGGGACATCTT	Zhou et al. 2014
Ahsnp1681	[G/A]	AGCTCCAA[G/A]TGATGAGCTTCTAGTGGCGTTGGAAAGTAGACATTCAGAGCTTTCCAACGATATATAATCGTATGGGGAGGAAATT	Zhou et al. 2014
Ahsnp1819	[A/C]	GAATGGCTTGATTGAGCTTGCTTGCTAGATCAGGGGGAGGATTACTTGTAGTTGACCTT[A/C]TCTTCTTCATGAATATTGTCCTT	Zhou et al. 2014
Ahsnp1828	[G/A]	TAAAAATTCATTCATCTACATTACTATCACCATAAAAAATGGATAAATCAACTTTTGTACCTCTAGGTTG[G/A]TAGAATTGCTGCTG	Zhou et al. 2014
Ahsnp1904	[A/G]	TAACCTGATGCTCTTCTCCTTCTCCTTCCTCCTCT[A/G]CGTTCCCAACCTAAGCTCCTTTCTTTTTCCATTCTCCTTTCTAATCTGA	Zhou et al. 2014
Ahsnp1993	[A/C]	TAATCTTCAAAACACCATAACTTTTGATCTAGAG[A/C]TTCGATTGCCGCTCCGTTTGCGGCCACGCGTTCACCGCGGAGANNNNNNN	Zhou et al. 2014
Ahsnp2057	[G/A]	TATGCAGGTTTTTTGTAGAATCA[G/A]GGTATGAGTTATACCTGGGTGCTCAAGCGTATTTATAATGGTGTGGAGTGACCTTTTTAGA	Zhou et al. 2014
Ahsnp7	[G/C]	AGCTCAATCCTCGGAGGCAAAAAACCTTTCCAAAGTGGACTTGTAAAGCTATAGCTTGT[G/C]ATTTCATCCGACATTGTTTCCGATT	Zhou et al. 2014
Ahsnp11	[C/G]	AGCTCACCAAGGGAA[C/G]AAAATCAAAGGAAAATGCCTACAATGCTTGCCACAAGAGTTGAACACGGGACCATGAGGAAGCAAGGAA	Zhou et al. 2014
Ahsnp105	[A/G]	TAAGGCTTTGCACCGTTCTCGGTGCCATCTATCAAGAACAGTGGTGGGCTGGTGGCGGTGTCTCCATAGTC[A/G]GGACCGTCGTGGC	Zhou et al. 2014
Ahsnp162	[T/C]	AGCTCAAACAATCTTCCGACCTTACGTCCAGTCCTAAAGATTTGTCCCGTCCGACGATCATG[T/C]ACACGACAATCAGAAACAAAAA	Zhou et al. 2014
Ahsnp183	[A/G]	AGCTCAAATTGGTATAAGAATG[A/G]GAGTCTCCTTCTCTTACCAAAGGGTCTTATCCCGAATATTTAGACGATCCCTTTTCTTACCG	Zhou et al. 2014
Ahsnp200	[T/C]	AGCTCAACCGAAAAACCCCCCCTTCAAGCTAACTTATGGGATAGAAGCTGAGATCCTTGTTGAGATCG[T/C]AGAGCCAAGCCCCAAA	Zhou et al. 2014
Ahsnp233	[G/A]	AGCTCAAGTTCCTGTCTCTGTTGCTCCTCTGTCAGCTTGTAAAGGATGGCTGATGAGCG[G/A]ATAATTTATACGCTTTTTGGCATTG	Zhou et al. 2014
Ahsnp299	[G/A]	AGCTCACGGTCAGTAGGATAGGCATGCATCATGTGTATTTGTTTGTCATTACTTGGTGTGCATAATTATTTTGGTTT[G/A]CCTATTT	Zhou et al. 2014
Ahsnp346	[T/G]	AGCTCAGCCAAATCGCCAAGAAAGCCCAAAAGGGCCCAAACAGAGGAATACGACCCAAATCCAAAGGAA[T/G]TCCAAGCCTATAGAG	Zhou et al. 2014
Ahsnp445	[A/G]	AGCTCATGTGTCTGTTATTTTTCCAGAACCC[A/G]ACACACCTAGTAGCTAACCTGAATATCGTCTCTCTGACATGCTCCACACTCTT	Zhou et al. 2014
Ahsnp565	[G/A]	AGCTCCATGACTCGAGAGCATTGTGCGGAGGCGGCCCCTACGAGGCAAATTGTGAACTCTTGGTGTC[G/A]GGATCCTGGGAACATGT	Zhou et al. 2014
Ahsnp593	[C/T]	AGCTCCCCACGGTTGGCCCAACAAATGGTATCAGAGCCTCCACCTAGTCGAGAAGGGGGAGATTTGTTTGGTATTTTT[C/T]TGGGCT	Zhou et al. 2014
Ahsnp843	[G/A]	AGCTCGATGAGAACCCCTGTTGTGTGAGAGTCAGAGAGGCGTTCTCACTTCTGAAGCTCGATGAGAAGGG[G/A]GATTCAGGGATTGA	Zhou et al. 2014
Ahsnp895	[C/A]	AGCTCGGACGGAGGAGTTACGGCGTTCGGAAGTTGACGTAGGGGTTTCGTGCCCTTCTTTTCTCCTCTCTAGTA[C/A]GTTGCTGTTC	Zhou et al. 2014
Ahsnp914	[A/G]	AGCTCGGCCAAATCTACA[A/G]GAAAGCCCAGAAATAGCCCAAATTGAGGAACACGACCCAAATCCAAAGGCAGCCTAAGCCTATAGA	Zhou et al. 2014
Ahsnp932	[A/G]	AGCTCGGGAAAAGCT[A/G]TTTAGCATTCTTCGGTCCAATGGAACTGTTCTTGCTTCCTTAGACTTTTGAAAAAATGATGTGATCGGT	Zhou et al. 2014
Ahsnp942	[T/C]	AGCTCGGTCAAATCGCCATAAGAAGTCCAGGCAGACCCAAACAAAGGGACACAGCCCAAACTAAAGGCAGCCCAAGC[T/C]TAGAAAG	Zhou et al. 2014
Ahsnp1036	[G/A]	AGCTCTACCTGAAATTCATGTTGAATTTACAATGAGTACTTTGTTTTTTAGGCT[G/A]GTCATAATAAGAGAAGCTGTAAGAAGAGAA	Zhou et al. 2014
Ahsnp1146	[C/T]	AGCTCTGGATGTTTACTTTCCAACGCCGTTGAGATCC[C/T]ACCATTTGGAGTTCTGTAGCTCCAGAAAATCTATTTCGAGTGCAGGG	Zhou et al. 2014
Ahsnp1174	[T/C]	AGCTCTTCAAAACGAGAATTTTGACACTAGTTACGAAAAATTTGACCCAAGATTGAGCCGGATGGA[T/C]TGAATCGATTGAACCGGC	Zhou et al. 2014
Ahsnp1186	[G/T]	AGCTCTTCACCCCCAATAATAGAGTTTAGAAACTCATGCCATCAAAGATACAAAGTTCA[G/T]ATCTAAAATGTCATGAGGTGTAAAA	Zhou et al. 2014
Ahsnp1324	[A/C]	GAAAGAGGAATTTGCCCTCTGTCCGCATC[A/C]TAAAATGGTTTATAGAGCAATGAAGGAGGCTAGGGAGAAGATCCAAGGAAATGAA	Zhou et al. 2014
Ahsnp1383	[A/G]	TAAGGCCCCTCCCCAGGATACCGAGATGATG[A/G]GTGAGAACCAAGAGGGGGCGCACGCTTCTCCCCCTCCCGAGGTCATCGTTGGC	Zhou et al. 2014
Ahsnp1467	[C/T]	TAACATTTATGATTTACCCCAACAAAAAGCTCTCAAAACCAAAGAGCTTATTT[C/T]CTTTCTCAAACCCTCACCCTCTTAGCACTTC	Zhou et al. 2014
Ahsnp1526	[T/A]	TAAGCATTTTGTTTTCCAGTATTACCACCGAATACAAAGATGCCACAGACACA[T/A]AACTGGGTGAACCTTTTCAGATTATGACTCA	Zhou et al. 2014
Ahsnp1527	[G/T]	TAAGCCTCCAGATATTCTCCTAGACCCATACAAC[G/T]TGTTTCTACACCAACCATTGCTATTCAATTTTGAGCATGCAACCATTATG	Zhou et al. 2014
Ahsnp1561	[A/G]	TAATCCATC[A/G]AGACACAGCAAAGCTCCTCACCCCCAACCATGGAGTTTAGAGACTCATGCCGTTGAAGATACAAAATTTAGATGT	Zhou et al. 2014
Ahsnp1618	[G/A]	AGCTCCTCA[G/A]TGAAATCGAATTCTTATCTATTTATACACTTTTCAATTATGGCATCCAGTACTTGAAGTGGACTTTTTGGCCTTG	Zhou et al. 2014
Ahsnp1625	[A/G]	AGCTCG[A/G]TTTCAATTACAACCTTGCTTCCGAGTATAGGGGGTACACGTCAGGTGCAAATTATTGCTGAATTGGAGTTTCATTTAG	Zhou et al. 2014
Ahsnp1648	[A/C]	AGCTCAAAATTAT[A/C]TGCTCGAATGGGGAGTAGACTAATGCTTCTTCCATAAAAATGAGGGGTGGAAGCTGTATAAGATCCCAATT	Zhou et al. 2014
Ahsnp1650	[C/G]	AGCTCAAAGGCT[C/G]GTTATTGGAGTTATTCATTGATAAAATCTGTGAGACAAGCGCTGGCAAAGGAGCGTTCAGCCCCTTTAGAGT	Zhou et al. 2014
Ahsnp1688	[G/T]	AGCTCCATTTTTG[G/T]GGTGAAGCTCAGTTGTGGAACTTGCACAAAGCTTTGAAAGCAGTGGCCCTTCCTTGTCAACACCATTAGAA	Zhou et al. 2014
Ahsnp1725	[A/G]	AGCTCGCTGCTACTGATGATGATGGTAAGCCGAGCC[A/G]CAGTCAGAAAAGGGTTCAGGCCGCCGCAGGTGCTACTGCCGGAGAGGG	Zhou et al. 2014
Ahsnp1750	[G/A]	AGCTCTCATGGAGCCTCACAGATGTTCAGAGCATTGCTGGAACTTCCTAAAACCAAACTTAGGGTTTGA[G/A]TGTGGGGGTCAACCA	Zhou et al. 2014
Ahsnp1857	[C/T]	TAAAGATCATGGTGCCTATGGCGCAGGGGATTATGAACTTTCCAGGATC[C/T]TGTCTCTTCTGAGGCAGTGTCGGTTGGTCCGGATG	Zhou et al. 2014
Ahsnp1876	[T/C]	TAAATAGGTGCGTTAGGGGGTTATCATT[T/C]CAGGGTGTTCACTTTCTTGACTTGGATTGTGCCTTAGCCATACTTGATTTTAGT	Zhou et al. 2014
Ahsnp37	[C/T]	AGCTCGAAAATCTGAGAAAAACAGAGCTGGATCCAACTACTTCAGCATCTGTATTCAAACAAGGAGCCTTTCTTGCTGA[C/T]GTACT	Zhou et al. 2014
Ahsnp74	[G/A]	TAAAA[G/A]GGAAATCAGACCGTGGGTGTAGGTATGTGCAAGTCGGACCGTGCGACATGCAGCTGCTCCCCAACACGGACCCTGCGAC	Zhou et al. 2014
Ahsnp85	[C/T]	AGCTCAAA[C/T]AATTTAGATGCGTAAATTGTCCTAATTTTATTATTGATAAAAATATATTCGAATTTTGTTATCGATAAAAATATTT	Zhou et al. 2014
Ahsnp135	[T/C]	AGCACGGCATAATGAGCCTGGA[T/C]AGACTGAAGCCTTTCCCTAGTCTCCAGCAGCTTGGCATATGTACAGGTGTTGCTCTCCTTGT	Zhou et al. 2014
Ahsnp160	[T/C]	AGCTCAAAATGCATATCTTCCAACATACCCTTCCCCCCAAATATTCTAGCACATTCCCTATATCATGAAACTTG[T/C]CACTGTGATG	Zhou et al. 2014
Ahsnp179	[A/G]	AGCTCAAATCTCACAAGGTATGTTGTTCTAGCTCTTTTTCTATGTTATCTGAAAAAGGAT[A/G]CTTGTTGAAAAACAATTTTTCAAT	Zhou et al. 2014
Ahsnp242	[T/G]	AGCTCAA[T/G]CCTCAATTGATCACTCCAGTACAACAAAACTGTCAGTTTCATGGACTCCCGTAGGAGGACCAACAAATTCATATCTG	Zhou et al. 2014
Ahsnp293	[T/C]	AGCTCACGCTCGAGCTTCCA[T/C]AGTAAGTGCACGTGATTCAATGCACTTAGGCCGGAGCCTGAGTCTCCCTTAGGTCCAATGTGTC	Zhou et al. 2014
Ahsnp309	[A/G]	AGCTCAC[A/G]TTTGACCTCAAACGTGAGTGACAGCAAAACACCCATTCTGCATTATGCCATTACACGAAGACGTTTGAGCCAACGTT	Zhou et al. 2014
Ahsnp339	[G/C]	AGCTCAGATTGAACTTTGTATCTTGGAGGCTTCATCATGATT[G/C]TATATAGTGCAAAATCTCACCTGAGAGATTATTTATTCTATA	Zhou et al. 2014
Ahsnp389	[T/C]	AGCTCATCACCACCACCACTGAATAGGTATGAGCGGCGCAACCACCGC[T/C]GATACACCCACCTCAAGAAGCTTCTGAGTCGTGTTG	Zhou et al. 2014
Ahsnp398	[T/A]	AGCTCATCCATACCATGAGAAAATCTGCTGCCAAGAAGGGGCACATGGCAATAAAAATCA[T/A]TCTCAAGAAGGCATATGACCACCT	Zhou et al. 2014
Ahsnp494	[T/G]	AGCTCCAAATGATGCACTTCCAACGGCATTGAAAATTATACATTCAGA[T/G]CTTTCTAACAATATATAATAGTATAGGGTGGACAAC	Zhou et al. 2014
Ahsnp616	[C/G]	AGCTCCCTAACCCAATGAAGAGGGTTTTAGTTGTTCATAGCTAT[C/G]GGAAAGGAAATAAAAAATGAAAAGTGCATTGAAGATAAAT	Zhou et al. 2014
Ahsnp625	[G/A]	AGCTCCCTCTCTCAATG[G/A]GAGGAAATTTTTCTACTCATAGCTCAAAGAGAAAGTACAAAAGAGGGAAGATATGAAGTGTGGAAAG	Zhou et al. 2014
Ahsnp660	[T/C]	AGCTCCGATTGCCGCACTGTTTACGG[T/C]TACGCGTTCCTTGTGAAAAGCTCTACAAAACCCATACAAGAAACTAGAGAGGTAACCA	Zhou et al. 2014
Ahsnp776	[C/T]	AGCTCCTTCCATATATTCATATTTCTGATGTTGATTTGGTGATTAGGGATGTTTGGGAGAATGGAGAT[C/T]GGATCTTACTAGACTA	Zhou et al. 2014
Ahsnp804	[T/C]	AGCTCGAAGGCGTGGCATGC[T/C]TGGCTAACCAATGCTTGAGAAGAACCTGGGCGTGCCACTTGGGGTCGAAGGCGTGGCACGCCAG	Zhou et al. 2014
Ahsnp822	[A/G]	AGCTCGACGGCATCGGATCCACGGCGGCAGCGGCGGTGGTAGCAA[A/G]GATGAACGCGTAAACACAGCTGTGGCGGCGCTCTCCTTT	Zhou et al. 2014
Ahsnp886	[T/C]	AGCTCGCTGTCGTCCATAGCCGCCGCCGTTTGTGCTCCAACT[T/C]GTCGCCACCATTGCGGACCGCCGCTGCCACCGCGCCACTCAT	Zhou et al. 2014
Ahsnp907	[A/C]	AGCTCGGCAGGGG[A/C]TGTTTAGAAGGAATACGAGAAGACCCTTCCGCAGCCACTTTGGCCGAGATATTTTGAGCCGCAGTAGACTT	Zhou et al. 2014
Ahsnp926	[C/T]	AGCTCGGCGT[C/T]GGTTAGCCTCTGAGGGTGGTGAAGTGGTTTGTTACCAATTCGCCAGTCCTATCTGAGGACGAATCTGAAGCATT	Zhou et al. 2014
Ahsnp945	[T/C]	AGCTCGGTCC[T/C]TGGGAGTCGACGCCGAGTTATTATCTATGGTGCCGACCTTAGGGTCTTGTAGAAGTCTGAGCTTTAATCCAAAG	Zhou et al. 2014
Ahsnp1013	[G/A]	AGCTCTACAAAA[G/A]TCACCCAAGAAAATGGTAAGCAAATCACGAAATATCCCTCAGTTTATTCTTCCAAAAATTTGAAATGTTAGG	Zhou et al. 2014
Ahsnp1040	[A/G]	AGCTCTAGATCTACCCCT[A/G]CTCCAAAAGGATTGGACGCATATCAAGAAGCCTCCTTCAAGCGCCAGACATACCAATTTGACTGGG	Zhou et al. 2014
Ahsnp1055	[T/C]	AGCTCTATCTCACCTAGCCT[T/C]ACTACACTCTTCCAACAATTCAAGCACTTCCAAGGATGAAACTGAAGAATCAACTCCAATTGAA	Zhou et al. 2014
Ahsnp1130	[G/A]	AGCTCTGCAACGTCTCGATGAATTGATGCAATTACTTCTGTTTTCCATTCAAAC[G/A]TGCTTATTTCTATCTAACATGTTCATTCGT	Zhou et al. 2014
Ahsnp1175	[A/G]	AGCTCTTCAAAACGAGAATTTTGATAGCAATTTCGAAAAATTCAGCCTAAAATTAGACCGGATGGGCCGAACCA[A/G]TTGAACCGGG	Zhou et al. 2014
Ahsnp1177	[A/C]	AGCTCTTCAAAATGAGAATTTTGACACCAATTTCAAAAAATTTAGCCCAAAATTGGACCGGACGAG[A/C]TGAACAGGTCGAACCGGA	Zhou et al. 2014
Ahsnp1247	[A/C]	AGCTCTTTGAAGCTTGGCTTC[A/C]TGAACTTTTCATATTTCCAGCAAAGTTTCAAACATTTTGGAAAAAGAGGACTGCAAATTAGAG	Zhou et al. 2014
Ahsnp1271	[T/C]	AGCTCTTTTTCTCTGTTTTATGTTCTGTTTTATGTT[T/C]TGAGCCTTCATTTTCCTGATTTTTCTGAGCCTCCCAGCAACCCTTTCT	Zhou et al. 2014
Ahsnp1321	[G/T]	TAAGGAGCGGTCCTCAAGACATCACGACGA[G/T]CCAGGCCCATCAAATCCGACAAACCGGACCCGCGGAAACATAAACAGCGCTA	Zhou et al. 2014
Ahsnp1327	[C/T]	TAAAGAAATTGCCCCAAAATCGAGCCAACGGGTCGAATCAGTTAGACCAAGCCAAAACTGGATCCAAGG[C/T]CCAACATATAAAATC	Zhou et al. 2014
Ahsnp1369	[A/G]	TAACGGCGATGACGATGGCGGCGGTG[A/G]CGACAGGTTCCACGACAATTCCCTTCTTCCCTTTTCCTCCCTTGATGGCGATTCGTGG	Zhou et al. 2014
Ahsnp1665	[A/G]	AGCTCAGATAGAACGAGAGTAATT[A/G]TCCGGCACGCGTTCATAGAATTGAGAATAATGATGAGGGTCACGGATCCTCAAATTTTTT	Zhou et al. 2014
Ahsnp1747	[T/C]	AGCTCTATCAATACGGCTACAGAA[T/C]TGTCCTTTGAACCATGTAAACTTACGGTCAGTAATCGGCAGGTCCACCAAACCCATGCCA	Zhou et al. 2014
Ahsnp1826	[T/C]	TAAAAAACCCTTTTAGGGGGAAAAAGAGCGCACATTGGCCTGAGACCTTTTTTCTAGCTGTAGTACCTTCTTAGGTTA[T/C]AGGCAT	Zhou et al. 2014
Ahsnp1958	[T/C]	TAAGTGTGGGTAGTGTTCCGAAGGTTACCTGAAACTGGAGGT[T/C]GATCTTGGATGAGATCTTCGGGTGTGATCAGAGCTGTGTG	Zhou et al. 2014
Ahsnp2015	[A/C]	TAATGTTCACCCCATACTATATATATTTTTGGAAATCCCTGGATGT[A/C]TACTTTCCAACGCCTTTGAAATCGTATCATTTGGAGCT	Zhou et al. 2014
Ahsnp2019	[A/G]	TAATTATGGGTCCGGTTGGACCCACGGGTCCG[A/G]TTTGGGCCCCAGTTCAATCGATTCAGCCCATCCGGTCCAATTTTGGGCCAAA	Zhou et al. 2014
Ahsnp225	[T/C]	AGCTCAAGGAGAGAGAACTCGAATTGAGAGAAGAGTAAAAAAT[T/C]TCACAATAGAATTCAAAGTCTTGGAAGCATTGAGTTCAGTG	Zhou et al. 2014
Ahsnp235	[T/C]	AGCTCAAGTTTTGGAAGCTTTACTC[T/C]TGTATAAAAGGGTAAACGGTCAGAAATTGAAGAAAAGAGAGTCAGCATACTGTTCGGAT	Zhou et al. 2014
Ahsnp410	[T/C]	AGCTCATCTATCGGTTATATAGCTAACCCGGATATCGT[T/C]TCTTTACACGAAGGGAATTATCAACCTTCTGATGCGTGAGTATCTT	Zhou et al. 2014
Ahsnp472	[T/C]	AGCTCA[T/C]TGGCAAAAAACGCTAGTAAAAGTCTGTTTTGGGCGTTCAACGCCCAAAAGAAGCATCCACTGGGCGTTGAACGCCAGT	Zhou et al. 2014
Ahsnp559	[C/T]	AGCTCCATAGCTCAAGTTATGGCTCC[C/T]GGAAGTTGATTGTGAATAGTATTTTATGAAACCTTTACTCGCTTCCTCTCATTCACGT	Zhou et al. 2014
Ahsnp733	[T/G]	AGCTCCTCCTCTAGGTTAGATAGGCGGTCCACCGTAAGCACCGCAACTCCTCCGCATGGTCCCTGAAAC[T/G]ACCCGCAACCATGTA	Zhou et al. 2014
Ahsnp807	[A/C]	AGCTCGAATTAGGGAGGAAACTCTAAAGCAAATGATGG[A/C]TCCAAGATATAACCAAAAGGGGGTCAAAAGGAACTTCAGCACTAAG	Zhou et al. 2014
Ahsnp951	[T/C]	AGCTCGGTCTTTCCTTTGAGGTCGTGTCTTTAGACTTCGACCCCTTTGGGGAAGT[T/C]GTGCTCGAGCATTTGCCTTTAGTCATTCT	Zhou et al. 2014
Ahsnp1010	[A/G]	AGCTCTAATGAAAGAGGCTTGTGCTTGAATTCATCATCGAACTTCC[A/G]CCAATGCTTGAATCTCCAATAAGCTCCATCATTCCAAG	Zhou et al. 2014
Ahsnp1080	[A/G]	AGCTCTCCCTCCCCTGTCGTA[A/G]CAGAGAGCCTCCAACCACTACGCGTAACACCCTTATTATCAGAATGTCACGCTTCCAGTTGTG	Zhou et al. 2014
Ahsnp1157	[T/C]	AGCTCTGTCATGAGGCTCAAGCTCTTCGAGTTATAGACTATTTGTATGGACTGCTTGTTTAGTTGCCTT[T/C]CCTGGTTCGACTTGA	Zhou et al. 2014
Ahsnp1217	[C/T]	AGCTCTTGCTGTAGCTAGGAAGGGTCTTCCAAGGATAATGGATTCATCCTCATCCTCCC[C/T]AGGGTCTAGGATTATGAAGTCAGCA	Zhou et al. 2014
Ahsnp1297	[G/A]	TAAGAATCGGAGTCCCTTGTAGGTACCACCACCCTCCAGTGACAACGGATCAGCAGCGCAGCAGTCCAACAAGTCGGACAC[G/A]ACC	Zhou et al. 2014
Ahsnp1302	[A/C]	TAAAAATTATAATTGAATAACTAAAAAAAATAGAAAAAAAAAACTCACTTTGGC[A/C]GCACACAGAGAAGAGGGAGACAGGAACCAA	Zhou et al. 2014
Ahsnp1351	[G/A]	TAATACTCGAATCCCACTTGTGGCTAAGAGACCGGACTCGAGTAGGG[G/A]CAATGTTCATACCTGACCCAATACTATGGTCCAGG	Zhou et al. 2014
Ahsnp1394	[A/G]	AGCTCTAACT[A/G]GTACGCCACATCCTGCAGTATAATTGTGCACTCCTTGAACAGTATATGAAATGTGTGCATCTCCGGATTCCATC	Zhou et al. 2014
Ahsnp1556	[A/G]	TAATCACAAGATAAACTATAAAATAGTGGTTTATCAAGCTAAAAATTC[A/G]TCCAAATAAACTAAAAAGAAAGGGTTCAATATGACA	Zhou et al. 2014
Ahsnp1592	[A/C]	TAATTACATGGTTGCGGGT[A/C]GTTTCAGGGACCATGCGGAGGAGTTGCGGTGCTTACGGTGGACCGCCTATCTAACCTAGAGGAGG	Zhou et al. 2014
Ahsnp1610	[A/C]	AGCTCCTGG[A/C]TACTATAGAAGTTTTTCTTTATTTTTTCCTTCTTACAAATCCTTTCTGGGAGGGTAAGCATAAGAAAGGGTACCT	Zhou et al. 2014
Ahsnp1741	[A/G]	AGCTCTAAATCTAATACAAGTGATTCCCCTTCCGAGGCTCACACAAGCATTCAATTGAATTCAACCCGCTTCT[A/G]GAGTGAGGACT	Zhou et al. 2014
Ahsnp1830	[A/G]	TAAAACCTCACCGGCGGCAAATCTCAGTGGCGGCAGAGGGGTTCTCCGGCGGCAGGACTC[A/G]GACAGAAGCTCTAACAACGGCGGC	Zhou et al. 2014
Ahsnp1906	[T/C]	TAACGTCCGTAAGTTGGACGCTCCACTAGCTCAGGCTTCGGCTTTG[T/C]GGGGATCTTCCATGAGGAAGATCTCGAGCTCTTTGAGA	Zhou et al. 2014
Ahsnp1926	[T/G]	TAAGAGGGGTTCTTTATCCCTGTTCCTGGTCATAAACAAGAAGAAAAGAGGAAAA[T/G]AAGAAGACTCTCTACACTAATAGGCAAGA	Zhou et al. 2014
Ahsnp1950	[G/A]	TAAGTAGAACGCATATGACGCGGTCCCATGACTGAGGCG[G/A]CCGCGTGGCAAGGAAAGGCTCCAAATGAGGCGACGGGGTGACC	Zhou et al. 2014
Ahsnp2027	[A/G]	TAATTGCTGGGTCGGTTGGGCCCACGGGCCC[A/G]GTTTAGGCCGTGTTCAACCGGTTCGATCCATTCGGTCCAATTTTGGACTGA	Zhou et al. 2014
Ahsnp41	[A/G]	TAACCTCCATGGCGTGCCACGCCTTCGAACCCAAGTGGCACGCCCAGGTTCTTCTCAAGCATTGGTTAGCCA[A/G]GCATGCCACGCC	Zhou et al. 2014
Ahsnp50	[C/T]	TAACAT[C/T]ACAACTGAGATTTACTCTTAGTATCAATAACTAAAAGAAAAGTACGAGGAGCCAATGGAATATTTGTATAACATGTAC	Zhou et al. 2014
Ahsnp234	[G/A]	AGCTCAAGTTTGAGAGGAAGGAGAAGGAGTGACTGCGTGAGAGAGTGCTTCGCAGAATC[G/A]CAGCTTAGCTTAGGGTTTCTCATTC	Zhou et al. 2014
Ahsnp259	[G/A]	AGCTCAATTCGAATTCTATTTATTGATACTCGTAGTAAATTGAATGAGTCTCATTC[G/A]AATAACCATGGGAGCACATTGTATATAA	Zhou et al. 2014
Ahsnp344	[A/G]	AGCTCAGCAGTGGCGACAGTGGCAAGACGCAACGGCAGTGGAGGCTTCTTTTCCCCTGTGC[A/G]TGCTCTTTCTTCTCCTTTCCGTG	Zhou et al. 2014
Ahsnp382	[A/T]	AGCTCATAGGGTAAAAAAAATTTGTGTAAGTGGTAAAAGGTAGGAGGTGGTGGTTGGGAGGGCAGTGCTGGGAAAAA[A/T]TTTTTTT	Zhou et al. 2014
Ahsnp392	[T/C]	AGCTCATCAGGACAGCATCCACGAAATTATTGCCAA[T/C]CCAGTGGTATTGGTGCCATTTGAACTTCAGCAGCTTTTATTATCAAAT	Zhou et al. 2014
Ahsnp395	[A/T]	AGCTCATCATCATC[A/T]TCTTCTTCTTCTTCTTCTTCTTCTTCTTCTTCGTCTCCAACAATCGTACACCGTCTTCTTTTTGAAGATC	Zhou et al. 2014
Ahsnp576	[A/C]	AGCTCCCAAAGTCGTGGCATG[A/C]TTACAACATGAGGAAGTATTATAGTTAGAAGCGAACTACACTCCCTGATGTACTCTTTTTCCT	Zhou et al. 2014
Ahsnp643	[G/A]	AGCTCCGATCGCAGCACCGTATGCGGCCAC[G/A]CGACCGCAGTGTCAAGCTCTACAAAGCCCAGTACTCAATTAGGTAAGGAAGTCA	Zhou et al. 2014
Ahsnp800	[A/G]	AGCTCGAACGGAGAAGTTACGGGGATCGGAAGGTTACC[A/G]TAAAGGGTTCGGTAAAGTTCGTTTCTCTTCTCCCCTAATGCACTTC	Zhou et al. 2014
Ahsnp879	[G/A]	AGCTCGCGGGAGAGGAGCTTGTT[G/A]CCGCCGCTACCATGGCTTCCTTGCCATCGCCGTGGTAGGGTAGCCACCGAAGGGAGCCGTC	Zhou et al. 2014
Ahsnp1026	[T/C]	AGCTCTACAAAGCCCAGTACATTGTAAGGTAAGAAAACCACTTTCTCCATCTCATTTT[T/C]CTCTCCTAAAATCCAAAAATGGTATG	Zhou et al. 2014
Ahsnp1056	[T/C]	AGCTCTATCTCTGTGTTTGTTGGCATTGCCATCACTTCT[T/C]TTTTTCCGCGCTGTCAGTAAACACTGTGACTTAGAATTAGTCTTA	Zhou et al. 2014
Ahsnp1058	[T/C]	AGCTCTATCTGGAGGACTATAATAGTAAAATTGGGATATCAAAGATCACATTGGGTAATCGCGTATTTACTC[T/C]AACTTCATTTGA	Zhou et al. 2014
Ahsnp1070	[A/G]	AGCTCTCA[A/G]TCACAGGGAACGACGTTGTCACTGGAAGTCATCACCGGAACTGCTGCTGCTTCGTTCCCTCATTTCTTCTTTATTA	Zhou et al. 2014
Ahsnp1158	[C/T]	AGCTCTGTGACATTTATGTATC[C/T]GGTGGTAATACTGGAAAATAAAATGCTTAGGGCCACGGTCAAGACTCATAAAAATAGTTATG	Zhou et al. 2014
Ahsnp1627	[A/T]	AGCTCCTT[A/T]TTTCTGCTTTTTGCTCTGAATTCTTTTGTAATTCTGTGAATTTCTGTAATTGAGAATCAATGTTGAAGATAATTTA	Zhou et al. 2014
Ahsnp1633	[C/T]	AAACATGACCCACATGACCAAACTTGGAGAGGAGGAAGAGGCAGTGATCGCCACTGATGAAGACCTCAATGGA[C/T]GTCCACTAG	Zhou et al. 2014
Ahsnp1703	[T/C]	AGCTCCTCACCCCCAACCAAGGGATTTAGAAACTTATGCCGT[T/C]AGAAATACAATATGAAATGTTGAGAATGTCATGAGGTCCATA	Zhou et al. 2014
Ahsnp1796	[A/C]	CGCTCCTCACCCCCACCTATAGGGTTTAGAGACTCATG[A/C]TGTCAAAGGTACAATTGAAGTGTAAAAATATCATAAGTTGTAAAAT	Zhou et al. 2014
Ahsnp1956	[G/A]	TAAGTGCCAGCGTGACACA[G/A]ACCAAAACGATGTAGTGTCAATCCTCCACCCCCAAATAAATGGAACGACGTCGTTTATGGTCTTG	Zhou et al. 2014
Ahsnp2024	[C/A]	TAATTCTTGAACGCAGTTACTTTATGAGTCTTGG[C/A]CGTGGCCCTAAGCACTTTGTTTTCCAGTATTACCACCGGATACATAAATT	Zhou et al. 2014
Ahsnp177	[G/A]	AGCTCAAATCGGGGAAGAGGCATTGAAACGTC[G/A]AATGGCTTCAAGATACAATCAAAAGGTAGTACTGCGAGGTTTTGCCGAGAAT	Zhou et al. 2014
Ahsnp298	[A/G]	AGCTCACGGTAAGCAACATAAATAAGGAGGTACCTCAAGCTTTTTTGGGGGACTTCAAT[A/G]ACATACTAAGTCAAGAAGAAAAGGT	Zhou et al. 2014
Ahsnp406	[T/C]	AGCTCATCGGGAAAGGTATAAGTGTCCGGCTACACTTATGACATAGGGT[T/C]AGCAGATGATCGAGTCTCAACCTGAAGCACCCAGT	Zhou et al. 2014
Ahsnp417	[A/G]	AGCTCATGAAAAAGGAGAAAGAAAAATATAGAAGTGACCAAAGGTCAAAGAGTAAACCATTTACTC[A/G]AAAAGAAAAGGTTGTCTA	Zhou et al. 2014
Ahsnp520	[G/A]	AGCTCCAATCGACGAGCCATTTGCGGTCAC[G/A]CGTCGCTCTTTTCATCCTCTATAATTCTATCTAAGTTTTTTGGTGAGTATTCTA	Zhou et al. 2014
Ahsnp557	[T/C]	AGCTCCATACGAGAAGCCTATGGTATATAATGG[T/C]ATTGTAACAGAGTAAAACTTTCCATGCTCATCATCCTACACCTCGCTCCCC	Zhou et al. 2014
Ahsnp645	[T/A]	AGCTCCGATCGCCGCACCGTTTGCGACCACGTGTCTGCAGTACTCCATTAGGTAAGGAAGCCACGTTTTT[T/A]TTTCCAATTTCTCC	Zhou et al. 2014
Ahsnp857	[T/A]	AGCTCGCAAGGTCATGGCACGCATGTAACCTAAA[T/A]AGATACTACATTTAGGAAGTGCACATTGCTCCCTGGTGTACTTTTTTCCC	Zhou et al. 2014
Ahsnp961	[A/T]	AGCTCGTATCTTGGGTGGAACTCCACCCGAACTTGGTGAAGATGGT[A/T]GGGATTTTCGTCAACCATTTGAGGAGCAAAGATCCTTG	Zhou et al. 2014
Ahsnp1050	[T/C]	AGCTCTATCAATACGGCTACAGAA[T/C]TGTCCTTTGAACCATGTAAACTTACGGTCAGTAATCGGCAGGGCCACCAAACCCATGTCC	Zhou et al. 2014
Ahsnp1147	[G/A]	AGCTCTGGG[G/A]GACTGAGGATAAATAGGCTTGTATATATAGTTCCTAAGATAGCCTCTGGAAAAGAGACAAAGACGGAGACACAGA	Zhou et al. 2014
Ahsnp1266	[C/T]	AGCTCTTTTCGATT[C/T]CGCGCTCTGGTTTCTCGTTTTCTGCTCCGAATTTGCAGTTTTTCTTCTTCCCTTTGATATTTCTTCTTTT	Zhou et al. 2014
Ahsnp1342	[A/G]	AGCTCG[A/G]CTAAAACTTCAAGAAATTTGAAAAACAAAATAAAACCAAAACCCAAAAAAAAAGACAAATTTGAGACGAACCCACACT	Zhou et al. 2014
Ahsnp1359	[A/C]	TAAGGGATGAAGAACTGGGGTCAAAT[A/C]GGGGCTTACCTCAAGGATAAAGTAGTGGGTTTTGTAGATCTCTTCACGGTGAATGCAT	Zhou et al. 2014
Ahsnp1621	[T/C]	AGCTCTCTTGTCT[T/C]TTAGAAGGACAATGGCAGAGAATTCTAAGTACTTTAGAGTACAAAAATCTCAATCTGAGGCAATGCTGCCG	Zhou et al. 2014
Ahsnp1623	[T/C]	AGCTC[T/C]TTCATTCTACGACAAATAGTTTCCCCCTTTTGATCTGGAGAGCAACACGCCGTCTACAACGAATAGCCCACAGTCTTTG	Zhou et al. 2014
Ahsnp1715	[A/G]	AGCTC[A/G]ACAATGTCCGGAAAGATTATTCCGGGCTCCAAAGTCATCTCGTTGGCAGCGTGACTGCGGCTTACGAGAACTTGAAGTA	Zhou et al. 2014
Ahsnp1731	[T/C]	AGCTCGGGTTTGGGAGGTTTCTCATCTTCCTGAGGGATTTTCAGAGGATCTATATTTTCT[T/C]TGGCTTCTCCAGATCAGGTTGAAC	Zhou et al. 2014
Ahsnp1890	[C/T]	TAACAATT[C/T]CACATAGTTCAACTTATTCTACGGTATCAATTGGCCAAAATTTTCACGTAATATTATATATTATCTATGAGAAAAA	Zhou et al. 2014
Ahsnp1951	[T/C]	TAAGTATATTGATTCTTGAACACAGCTACTTTCTGAGACTTGG[T/C]CGTGGCCCTAAGCCATTTGTTTTCCAGTATTACAACCAGAT	Zhou et al. 2014
Ahsnp1996	[A/G]	TAATCTTGTTCTCTACCACACAGACACAAGTTTGTTGAAAGTCAAAACATTGGCAGGG[A/G]GTCTCAGGTAGAGAATTTTTCAAATT	Zhou et al. 2014
Ahsnp13	[C/T]	AGCTCATGAAAATGATCACCATCATCAAGTGCCGCTCTAGGATCTAAGGTTGGAAGGAGACCAACCATGATAGCTATTTATG[C/T]TA	Zhou et al. 2014
Ahsnp418	[G/T]	AGCTCATGAATGGCAGAAGGAGATTTAGTGGAATCTCTATGGTCTCTA[G/T]ATAAGCCTCAGATTCCTTTAGGTCCTTGATAAACCC	Zhou et al. 2014
Ahsnp608	[G/A]	AGCTCCCGCAGTGCCTTCTGAAACAGAA[G/A]CTCCAGGTGACCAACCTCAAAGCACCTCTCGAAAAATCTGTCCTATTGGGTCGCGT	Zhou et al. 2014
Ahsnp669	[C/G]	AGCTCCGCGGTGGCTTTCTTTACCTTTTG[C/G]CATTTTCGATTTTCCTTCTCCTTCACCTGATTTTGTTTTTAGGCGAATTCTAAAG	Zhou et al. 2014
Ahsnp670	[T/C]	AGCTCCGCGGTGGCTTTCTTTACCTTTTGCCATTTTCGATTTTCCTTCTCCTTCACCTGA[T/C]TTTGTTTTTAGGCGAATTCTAAAG	Zhou et al. 2014
Ahsnp779	[T/C]	AGCTCCTTCGAAGTGAGGGGTCGCTCCATGTATGCTC[T/C]GGGATTCCCACAGACGGCGCCAATGTTCGAGACCTGGTGACCTCGGG	Zhou et al. 2014
Ahsnp1057	[A/G]	AGCTCTATCTGAAAGACTACAACGAAAAATTTTGGGTCTTGAGAACTGCATT[A/G]GGTATTTACGCGAATCTCAAGGACGACTATGT	Zhou et al. 2014
Ahsnp1374	[T/C]	AGCTCTAATTT[T/C]GCGCACCAAGTTTTTGGTGCCGTTGCCGGAGATTGTTCGTGATTGATAACTACCAGTTGTCTTGTTGCTTAGA	Zhou et al. 2014
Ahsnp1390	[C/T]	AGCTCTCTGCTCGCT[C/T]GGTGCTAAACACAGACCTAGGCATTTAGCACCACGCCCTCGTCCCTTGAATTTCAAAAAAAGACCCAGG	Zhou et al. 2014
Ahsnp1442	[A/G]	TAAAGATGTTCAACCTGATCTGGAGGAACCA[A/G]AGAAAATATAGAACCTCTGAAAATCCCTCAGGAAGAGGAGAAACCTCCCAA	Zhou et al. 2014
Ahsnp1477	[A/T]	TAACCTTCTCTGAGGTTGGACTACTGCTTTGAAATTC[A/T]CCTCCAAGAGAATTTTATGCATACATACTGCAGGGCTAATGCCCT	Zhou et al. 2014
Ahsnp1481	[G/A]	TAACGACCTCTTCGCTTGGGA[G/A]GGTGTTCCTACGTGTAGTAGCGTCGCAAGTTGGTGGCATTCCAGGATCTCGAGAGCTATGGTA	Zhou et al. 2014
Ahsnp1494	[A/G]	AGCTCT[A/G]TAACTCTGTGAGGGTTTTTGAGAGAGGAAAAAGTGAGGAGAGAAGTGAGAAGAGAGGAAATGACAGTAGAATTGGATA	Zhou et al. 2014
Ahsnp1520	[A/G]	TAAGATCAAAGGGCTCGGAAGTTTTTTGCTTTTTACTTGGAGGAACAATGGGTGGAACAGCA[A/G]AAGAAGAAGGGGGATCCACCAA	Zhou et al. 2014
Ahsnp1609	[A/C]	AGCTCCTCACCC[A/C]TACCTATGGGTTTAGAGACTCATGCCGTCAAAGATACAATATGGAATGTAAAAATGTCATGAGTTTCAAAAT	Zhou et al. 2014
Ahsnp1822	[A/T]	T[A/T]AAAAAAAAAAAAGCATAACGTCAAGAAAGTACCTGGGAGTAGGGCAAAGAAATAACAATTATTGTATTACAAAATCCAAAAAG	Zhou et al. 2014
Ahsnp1825	[A/C]	TAAAAAA[A/C]CAAAAGTAGAAGTTTGCAGAAGAAGAAAATGAATACAGAAAACTAAACTCAGATCCAATTCTTAGAATAATTGAGAA	Zhou et al. 2014
Ahsnp2007	[A/C]	TAATGCCTCTTCCTTGATCCAAGCT[A/C]TTTCTCGAATTTTTGGAAGTAGGTCGGGTTCTTCCCTTTGAAGTTGGGGGTTGGGTT	Zhou et al. 2014
Ahsnp496	[C/T]	AGCTCCAAATGATG[C/T]GCGTTCAAAGGCATTGAAAAGTAGAAATACAGGGCTTTCCAACAATATATAATAGTATGGAGTGGACACT	Zhou et al. 2014
Ahsnp647	[A/G]	AGCTCCGATCGCTACATCGTTTATGGCCAC[A/G]TGACTGTGGCGTTGAGATCTACAAAGCCCATAAGATTGTGTAAGAGGAAAGCCA	Zhou et al. 2014
Ahsnp727	[T/C]	AGCTCCTCCATGAGGCAATAAAATCATGATACATATGGTT[T/C]CACTTTCACATTCCCAAATAATTCTTTACACACTATTACATGCA	Zhou et al. 2014
Ahsnp734	[A/C]	AGCTCCTCGCCACCGCTGCTAGCGCCGAAAA[A/C]CGCCTTTCAAGCCGGTATCTGTTGGGAGGAGTCCAAGCAAGAAAAGGAAGAAG	Zhou et al. 2014
Ahsnp1272	[A/C]	AGCTCTTTTTCTCTTATTTTGTGTGCCGAGGTCTTCTGTAAATGATTATTTACCTTGTTGTCAATAAACTCTATATAAA[A/C]AAATA	Zhou et al. 2014
Ahsnp1504	[A/G]	TAACTTCTCTGATGAAGCCGGCCTCTAA[A/G]AGTGCTTGTACTTGCTCTTCCACCGCTTGAGCTAGTACTGGGCCGAGCTTACGC	Zhou et al. 2014
Ahsnp1593	[T/G]	TAATTATGGGGTCATCCATCCTTGATCATGACCTGTTATGGCTA[T/G]GATTTTTTCTTCTTCCGAGATGGACGGACTCTGCAATA	Zhou et al. 2014
Ahsnp1710	[G/A]	AGCTCCTTTTCTCTGTGGTTGTGTAATTCTTCTGTGCGTCATTTAGAACATG[G/A]CTTGCCTCGTACACCACGTGCAGAAGCTTGTT	Zhou et al. 2014
Ahsnp1755	[T/C]	AGCTCTCGCCGCCCAAAT[T/C]AGACCACCAAATACCTTTACCAATCAACCCTCAAGCTCTAGTGCACTTCCTTTTCAATCACAGTAT	Zhou et al. 2014
Ahsnp1867	[A/G]	TAAAGTGGAAAGAAACCACTTGGAAGAGAATGTTGCAAAATGCAACAGCTTTGCGTGAGATTATATTGGATG[A/G]TACAGNNNNGTC	Zhou et al. 2014
Ahsnp205	[A/G]	AGCTCAACCTTCTGGCGATC[A/G]GTGAGGGAGTTGAGGAAGCCTGGTTTGAGCTTGGAGAAGGCGGAGTCTTCAGGCGCGAAGAGGG	Zhou et al. 2014
Ahsnp273	[T/C]	AGCTCACATAGAGGGAAATACCATAATCGACGAGGAGAGG[T/C]CGATCACAAAGAAGGGAAATGAGCATGCTAGGGATCCCGTGCAA	Zhou et al. 2014
Ahsnp363	[A/C]	AGCTCAGTACACTGTCATCTG[A/C]TGCTCCATCTGCTGAAGTCGCTCCAGTTACTCCTTCCACTCTAGCCTAAGGTCATCCGTGTTC	Zhou et al. 2014
Ahsnp423	[T/C]	AGCTCATGCCCATGAACCACAACAACAAGAAGAGGAAGAGGCAGAAGAG[T/C]AACCTCAATTCTTGGCACTTCAACCACCACCACAA	Zhou et al. 2014
Ahsnp667	[T/C]	AGCTC[T/C]GCCGTTCGCGTTTCACCGTGCCTCGAGGTCTGCCGTTATGTGCGCTATGGCTTTCCTCTCCGGAAGCCTCAACTCTCCC	Zhou et al. 2014
Ahsnp1088	[C/T]	AGCTC[C/T]CCTTGGCTCATTTGGATTTTTTACCCTAAATAATAATTCTCTCTATAATCAAACTAATATGATATCAACTTGAAAATAC	Zhou et al. 2014
Ahsnp1160	[A/G]	AGCTCTGTTCGCAGCGTTTGCATGCATAGTGTGAACGCAGAAGCCTTTTTTATTTTTCATCCACGCATAC[A/G]TGTACATGGCACGT	Zhou et al. 2014
Ahsnp1183	[C/T]	AGCTCTTCAATTCTAGCTAACAAAGTTGGCAAGATGTCAATATCCATACTCCAGTTT[C/T]TAGCCCTAACAATTCCGCGATTTTGGG	Zhou et al. 2014
Ahsnp1220	[G/A]	AGCTCTTGGAGCAAATCTTTAGTGGCTGGAATAATTGGGTGTGGATTGGAGTCTTTGAAACTTGAATTTTGGTG[G/A]TTTTGAACTT	Zhou et al. 2014
Ahsnp1221	[G/A]	AGCTCTTGGAGCAAATCTTTAGTGGCTGGAATAATTGGGTGTGGATTGGAGTCTTTGAAACTTGAATTTTGGTGATTTTGA[G/A]CTT	Zhou et al. 2014
Ahsnp1536	[T/C]	TAAGGTTCAGACTTTCATTGTAACAGCATCACGCAATTTTTTGGTCTCCTTTTATCGTGGTGATCC[T/C]TTCTGGAGATGGGAAC	Zhou et al. 2014
Ahsnp1879	[G/A]	TAAATCAGGCAGAATCAGGAACAGAATTATAAAGTTGTAGAAAAAGAAATTGTAGCA[G/A]AGGATTATCAGAAACTGAAATTGCATA	Zhou et al. 2014
Ahsnp190	[T/C]	AGCTCAACAATAACAGTGGACCTCCTCATTGCTTTTGCCGCCATAATCTCCTTCAACTCCCCCTTCCCCTCTCTTT[T/C]CATCCCCT	Zhou et al. 2014
Ahsnp477	[T/G]	AGCTCATTTGAAATAAGAAAAAAAAAAGAGAAGCATCAAAGAAAGAATG[T/G]TTCAAGGGCCATGGGCTAAGGTATAGAAGAAGTCT	Zhou et al. 2014
Ahsnp634	[T/C]	AGCTCCCTTTTTCTCTCT[T/C]TGTGCTATACCCGAATGAGCAACACTTCAACAGCAGTAAACTTCTTTTCCTTCCATTTAGGCCACG	Zhou et al. 2014
Ahsnp861	[C/T]	AGCTCGCAGCTGATCGTTTTTGCCTTCCTCTTCCTC[C/T]ACTTCTATTTGAACTCGAGGATACAACATCACTGACCATAAAAAGCAT	Zhou et al. 2014
Ahsnp999	[T/C]	AGCTCTAAATGATGCGCTTCCAACAGCATTGGAACGTAGACAATCAGGGCTTT[T/C]AAAAAATATATAATAGTATGGGGTGGATGAT	Zhou et al. 2014
Ahsnp77	[A/C]	AGCTCCTCACCCCCAA[A/C]AATGAGGTTTAGAGATTCATGCCATCAAAGAGTATAAAATTCAGATCTAAAAATGGCATCAGATACAA	Zhou et al. 2014
Ahsnp1472	[A/G]	TAACCGTTGATCAACCAAATCGGAGGGTAAATTTCTGGAGTGAAATCGGACC[A/G]ACCGATTTCTTGACCATATATATATGTATA	Zhou et al. 2014
Ahsnp1473	[A/T]	TAACCGTTGATCAACCAAATCGGAGGGTAAATTTCTGGAGTGAAATCGGACCAACCGATTTCTTGACC[A/T]TATATATATGTATA	Zhou et al. 2014
Ahsnp1823	[A/T]	T[A/T]AAAAAAAAAAACAAAAACAATACTCACCAAGCACATAGTCACAACAAAAAAAAATACTCACCAAGCTGATAACTGAAACTATA	Zhou et al. 2014

## Sheet: SSR
S1 Table. The primers’ sequences of SSR markers of the genetic map used for QTL mapping in this study.
LGs	Univeral Name	Forward Primer Sequence (5'-3')	Reverse Primer Sequence (5'-3')	Reference
A01	TC4G05	AACCCACTACGGGACTACCC	ACGACGTGGAGGAGAAGAGA	Moretzsohn et al. 2005
A01	TC2D06	AGGGGGAGTCAAAGGAAAGA	TCACGATCCCTTCTCCTTCA	Moretzsohn et al. 2005
A01	GA110	GGAGAACCAGTGACGTGACATA	GGATTAATTCTGATACCATGAAAGG	Ma et al. 2006
A01	ARS721	TCAGGGTGGGTTACCAACAT	TAATCCACATTGAACCGACG	He et al. unpublished
A01	ARS729	GGGATCCATGCCTTGAAAAT	CCAAATCAAAACAAACAAAACA	He et al. unpublished
A02	AHGS1163	CCCAAGATAAAGCCAACGAA	CAAAGCTGCGATTTGGAAGT	Shirasawa et al. (2012b)
A02	AHGS0426	CTACCGTCGAGTCACCCATT	CTTCGACACCGACAACACTG	Shirasawa et al. (2012b)
A02	AHGS1495	CCCTTTGATTGAAGGATGGA	GACCTAATAGATTGTTGGCGG	Shirasawa et al. (2012b)
A03	ARS744	GGCAAATTTTTCACCTAGCG	TCAATACTTTCGTTGCATGGAT	He et al. unpublished
A03	ARS749	TTCTCATGCTGCTGCTTTTT	CCATTTTAGCCAATTCTTTTTACA	He et al. unpublished
A04	AHGS1816	CTCCCCTGATTTGCCAACTA	AAGGAAACCTTGTTAATGGGG	Shirasawa et al. (2012b)
A04	ARS726	GTGTCCGAATCTTTCACGGT	CGACATTAAAATGCCCGAAT	He et al. unpublished
A05	GM630	CAGCAATTCAGCAAACTAATGAA	TCCTCCCACGTCCTTTTATTT	Nagy et al. (2010)
A05	ARS702	ATGGCACATGAACAGCAAAA	TCCTCTTGCAAGCAAAATCC	He et al. unpublished
A05	ARS754	GAGATGCGTCAAAGGGCTTA	TCTAAATGGGTGGACAAGCG	He et al. unpublished
A05	GM1890	CTCTCCGATTATAGGCCAACC	TGGCTTCTCCGTGAAAATAAC	Knapp et al. (unpublished)
A06	AHGS1326	TTCAAGCAGCAGTGTTCACC	ATGTCGACGTTGGTCTCTCC	Shirasawa et al. (2012b)
A06	AHGS0153	CTCCATCGTGTTTTGCTCCT	GCACTTGCAACGCTGTTCTA	Shirasawa et al. (2012b)
A07	GM1990	TCCTTCCCACAATAACAATGAA	GAGGAGAAAACATGGCCTAAAA	Nagy et al. (2010)
A07	AHGS1475	TACTCGCCGCTCTCTTTGAT	ACAAGATCGGTGGCAAAAAC	Shirasawa et al. (2012b)
A07	AHGS1454	TGCTTTTGCTCAACATGCTA	ACAGACATTGCAGCTTCACG	Shirasawa et al. (2012b)
A08	AHGS1578	ACGGTTGTGAAGGGATCAAG	CCCGTATTTCTTTCACCCAA	Shirasawa et al. (2012b)
A08	AHGS1891	CAGCAACCAGCAACTCAGAA	GCGAACTCTGCACACATCAT	Shirasawa et al. (2012b)
A08	AHGS1434	CTGGTTAGATTCTCCGGCAC	CAGCTCAATCCTACGCATCA	Shirasawa et al. (2012b)
A09	ARS766	AACTGGTTAGACCGGGTTCA	TGTCACCCCTCACTCTCATCT	He et al. unpublished
A09	ARS742	GATTTAATGGGGGATGAGGG	TCACCCACACCCTTTTGATT	He et al. unpublished
A09	GM2792	ACTTCAACCTCCCATGTCCTATT	CAACCAGCTCCTTCTCTACCC	Knapp et al. (unpublished)
A09	ARS730	GTTCACGTCCTTGGTCTGGT	TTGAATCTTCAAGAATTGGGG	He et al. unpublished
A10	ARS775	TTCCTAGAGTGTTTTGGCTTACTG	AAAAACCTAATTATTCGACTTAAAGCA	He et al. unpublished
A10	GM692	TGAGGCCGTCTTGTTTAGAGA	CCTCTTCCATCACCGTTCATA	Knapp et al. (unpublished)
B01	GM1331	TCAAGCAAACTGGTCAGAGAA	CAACCAGCTCCTTCTCTACCC	Knapp et al. (unpublished)
B01	ARS756	TAACCACAAGCAAGGCAACA	AATGGCTTCCAGAAGCTTGA	He et al. unpublished
B02	AHGS1818	TCGTGCGACAGAGAAGTCAC	CCAACAGAAAATTCATTCGC	Shirasawa et al. (2012b)
B02	seq18E07	AACGTGCGTGGAAAGAGTTC	TGAGAGTGGTTTTTGTTGGTG	Ferguson et al. 2004
B02	AHGS1805	ACCAATATTGAGCCAAACGG	AGCCAAGGATTTGCATGTTC	Shirasawa et al. (2012b)
B03	AHGS1201	ATGGTGGTGGTGATGGAAGT	CCCACCAACAGAAGCAGAAT	Shirasawa et al. (2012b)
B03	AHGS1661	TTGGCGCTCTCTTTTCTCTC	TGTGCTCAAATTATTACCATTTTTG	Shirasawa et al. (2012b)
B03	AHGS2526	AATGATTTTTGGCTCCGTTG	CCCTCGAAAATTCGAATCAC	Shirasawa et al. (2012b)
B03	AHGS1429	CGCGACATAAGTGGACAGAG	ATGGTGATCTCTTTGGTGGG	Shirasawa et al. (2012b)
B03	AHGS0299	CTGTGCAAGCAAAGTTGGAG	AACAAAGGTCGGCCAGAGTA	Shirasawa et al. (2012b)
B04	AHGS1579	GCTGAGCTGAGCCAGAAACT	TTTCTGGAATCGCATCTCCT	Shirasawa et al. (2012b)
B04	GM1959	GTGTTCTCAGCCATCTTTTCG	GTGAAGGTGTTGTGAATGCAG	Nagy et al. (2010)
B04	AHGS0288	CAGTTCTGAGCAAGCACTCG	ATTAGAACCCCTCACCCCAC	Shirasawa et al. (2012b)
B05	AHGS1321	CTTTCACCGACTAACCACCC	TTCATGACGAGCATTTCGAC	Shirasawa et al. (2012b)
B05	AHGS1497	TCTTCCTAAGAAGGCAAGAGC	TGGGGAAGAATAAACCATGAA	Shirasawa et al. (2012b)
B06	AHGS1422	TAGAAATGGAAAGGATGGCG	CCACGAATAAACTGGGATGG	Shirasawa et al. (2012b)
B06	AHGS2093	CCGTCAAATTTTCCGTCACT	TGGTGGTGGCAACAACTCTA	Shirasawa et al. (2012b)
B06	AHGS2317	ATTCAGTTTGGGGGAGGAAG	TGGGTCTCTGTCCATCAGTG	Shirasawa et al. (2012b)
B06	AHGS1431	AGTGGAGGAGCTGTCAGAGG	TTGCGATCATTATCGTTGGA	Shirasawa et al. (2012b)
B07	GA24	AACGAAATATTTTGAGAAAGGAT	AGCATTAGCAACTCTAAGCTCAT	Ma et al. 2006
B07	GM624	AACGAAATATTTTGAGAAAGGAT	AGCATTAGCAACTCTAAGCTCAT	Knapp et al. (unpublished)
B08	AHGS1553	GGTGTGGGTTTCAAAGGTTG	CGAGTTTGGAGGCTTCTCAC	Shirasawa et al. (2012b)
B08	AHGS1388	AATGAGATGCGCGTAGAAGG	CTAATTGAACCCAAGCCCAA	Shirasawa et al. (2012b)
B08	GM1760	TGAAGAGCCATGTCAGATCG	AGGGCCCCAACAAGATAAGT	Knapp et al. (unpublished)
B08	AHGS1141	CCGACTCATGACTCACCACT	ACTTTCCTGTGGAGGTGACG	Shirasawa et al. (2012b)
B09	AHGS1445	AAAGAGGAAGTAGCGGAGGC	TTAGCAATTACCCATTCGGC	Shirasawa et al. (2012b)
B09	AHGS1998	TGAAACGGGAAAGTGTGATG	GGAAAGGCAAGGAATTGGAT	Shirasawa et al. (2012b)
B10	GM690	CTACTCCCTCTGCTGCTTCCT	TAGGGTTTCGTTGAGGAGGTT	Budiman et al.2006
B10	AHGS2010	TATTTCTGCTTCGGCGCTAT	TTTCCCCCATCTCACTCAAC	Shirasawa et al. (2012b)
B10	AHGS1564	CTCTCTGCCATTGCATGTGT	AACTGCTTTTAAAATCTCCCCC	Shirasawa et al. (2012b)
B10	AHGS1595	CCTTCACCCTTTGTTTCAGC	ATGCACCAACAAATCCAACA	Shirasawa et al. (2012b)
B10	AHGS1669	CTCCTTCTCTCCCCATCACA	CATTCATTGTGTGTTTGCCC	Shirasawa et al. (2012b)
B10	AHGS1742	TGGCAAATCTGCAAAGACAG	CGCACAACTCATCACCCTC	Shirasawa et al. (2012b)
B10	GM678	ATGTCCTTGCCTTGTTTCGTT	TAGTTGGCGGTATGGCTTAGA	Budiman etal.2006
